# Supplementary material for: Coastal HF radars in the Mediterranean: Applications in support of science priorities and societal needs
Source: Copernicus journal article supplement (doi:10.5194/os-2021-115), 2021-12-14
Supplement: Supplementary file [file os-2021-115-AC3-supplement.pdf]

## Coastal HF radars in the Mediterranean: Applications in support of science priorities and societal needs

Emma Reyes<sup>1</sup>, Eva Aguiar<sup>1</sup>, Michele Bendonì<sup>2</sup>, Maristella Berta<sup>3</sup>, Carlo Brandini<sup>2,4</sup>, Alejandro Cáceres-Euse<sup>5</sup>, Fulvio Capodici<sup>6</sup>, Vanessa Cardin<sup>7</sup>, Daniela Cianelli<sup>8,9</sup>, Giuseppe Ciralo<sup>6</sup>, Lorenzo Corgnati<sup>3</sup>,  
5 Vlado Dadić<sup>10</sup>, Bartolomeo Doronzo<sup>2,4</sup>, Aldo Drago<sup>11</sup>, Dylan Dumas<sup>5</sup>, Pierpaolo Falco<sup>9,12</sup>, Maria Fattorini<sup>2,4</sup>, Maria J. Fernandes<sup>13</sup>, Adam Gauci<sup>11</sup>, Roberto Gómez<sup>14</sup>, Annalisa Griffa<sup>3</sup>, Charles-Antoine Guérin<sup>5</sup>, Ismael Hernández-Carrasco<sup>15</sup>, Jaime Hernández-Lasheras<sup>1</sup>, Matjaž Ličer<sup>16,17</sup>, Pablo Lorente,  
18,19, Marcello Magaldi<sup>3</sup>, Carlo Mantovani<sup>3</sup>, Hrvoje Mihanović<sup>10</sup>, Anne Molcard<sup>5</sup>, Baptiste Mourre<sup>1</sup>, Adèle Révelard<sup>1</sup>, Catalina Reyes-Suárez<sup>7</sup>, Simona Saviano<sup>8,9</sup>, Roberta Sciascia<sup>3</sup>, Stefano Taddei<sup>2</sup>, Joaquín  
10 Tintoré<sup>1,15</sup>, Yaron Toledo<sup>20</sup>, Marco Uttieri<sup>8,9</sup>, Ivica Vilibić<sup>10,21</sup>, Enrico Zambianchi<sup>9,22</sup>, Alejandro Orfila<sup>15</sup>

<sup>1</sup> SOCIB, Balearic Islands Coastal Observing and Forecasting System, Palma, 07122, Spain.

<sup>2</sup> Consorzio LaMMA, Livorno, 57126, Italy

<sup>3</sup> Consiglio Nazionale delle Ricerche (CNR), Istituto di Scienze Marine (ISMAR), Lerici, 19032, Italy

<sup>4</sup> Consiglio Nazionale delle Ricerche (CNR), Istituto per la Bioeconomia (IBE), Sesto Fiorentino, 50019, Italy

15 <sup>5</sup> Mediterranean Institute of Oceanography, Université de Toulon, Aix Marseille Univ., CNRS, IRD, MIO, Toulon, CS 60584 83041, France

<sup>6</sup> Università degli Studi di Palermo, Palermo, 90218, Italy.

<sup>7</sup> Istituto Nazionale di Oceanografia e di Geofisica Sperimentale (OGS), Sgonico, 34010, Italy.

<sup>8</sup> Stazione Zoologica Anton Dohrn, Naples, 80121, Italy.

20 <sup>9</sup> Consorzio Nazionale Interuniversitario per le Scienze del Mare (CoNISMa), Rome, 00196, Italy

<sup>10</sup> Institute of Oceanography and Fisheries, Split, 21000, Croatia

<sup>11</sup> Physical Oceanography Research Group, University of Malta, Msida, MSD 2080, Malta.

<sup>12</sup> Università Politecnica delle Marche, DISVA, Ancona, 60121, Italy

<sup>13</sup> Qualitas Instruments Lda., Caparica, 2825-182, Portugal

25 <sup>14</sup> Helzel Messtechnik GmbH, Kaltenkirchen, 24568, Germany

<sup>15</sup> Mediterranean Institute for Advanced Studies – IMEDEA- (CSIC-UIB), Esporles, 07190, Spain.

<sup>16</sup> National Institute of Biology, Marine Biology Station, Piran, 6330, Slovenia

<sup>17</sup> Slovenian Environment Agency, Ljubljana, SI-1000, Slovenia

<sup>18</sup> NOLOGIN CONSULTING SL, Zaragoza, 50018, Spain.

30 <sup>19</sup> Puertos del Estado, Madrid, 28042, Spain.

<sup>20</sup> School of Mechanical Engineering, Tel-Aviv University, Tel-Aviv, 6905904, Israel.

<sup>21</sup> Ruder Bošković Institute, Division for Marine and Environmental Research, Zagreb, 10000, Croatia

<sup>22</sup> Dipartimento di Scienze e Tecnologie (DiST), Parthenope University of Naples, Naples, 80133, Italy.

Correspondence to: Emma Reyes (ereyes@socib.es)

35 **Abstract.** The Mediterranean Sea is a prominent climate change hot spot, with many socio-economically vital coastal areas being the most vulnerable targets for maritime safety, diverse met-ocean hazards and marine pollution. Providing an unprecedented spatial and temporal resolution at wide coastal areas, High-frequency radars (HFRs) have been steadily gaining recognition as an effective land-based remote sensing technology for a continuous monitoring of the surface circulation, increasingly waves and occasionally winds. HFR measurements have boosted the thorough scientific knowledge of coastal

Eliminado: -

Eliminado: Ocean

Eliminado: -

Eliminado: being their

processes, also fostering a broad range of applications, which has promoted their integration in Coastal Ocean Observing Systems worldwide, with more than half of the European sites located in the Mediterranean coastal areas. In this work, we present a review of existing HFR data multidisciplinary science-based applications in the Mediterranean Sea, primarily focused on meeting end-users and science-driven requirements, addressing regional challenges in three main topics: (i) maritime safety; (ii) extreme hazards; (iii) environmental transport process. Additionally, the HFR observing and monitoring regional capabilities in the Mediterranean region required to underpin the underlying science and the further development of applications are also analyzed. The outcome of this assessment has allowed us to provide a set of recommendations for the future improvement prospects to maximize the contribution in extending the science-based HFR products into societally relevant downstream services to support the blue growth in the Mediterranean coastal areas, helping to meet the UN's Decade of Ocean Science for Sustainable Development and the EU's Green Deal goals.

Eliminado: the

Eliminado: finally

### 1 Coastal monitoring to support Blue Growth in the Mediterranean Sea

The coastal and ocean economy has been since ancient times and is nowadays, more than ever, the backbone of the Mediterranean countries' blue economy. In 2017, the Mediterranean was the third largest sea basin in terms of Gross Value Added (GVA) and the first in terms of employment (European Commission, 2020). The key sector is clearly coastal tourism, from which the Mediterranean is the world's leading destination, followed by maritime transport, living resources and port activities. Furthermore, coastal tourism and fisheries benefit from the location of the Marine Protected Areas (MPAs) which are currently covering 7% of the northern Mediterranean Sea surface (Meola et al., 2019), and are expected to increase as one of the goals of the United Nations (UN) Decade of Ocean Science for Sustainable Development.

Eliminado: the

Mediterranean coastal areas and communities are, however, negatively impacted by all human activities related to these traditional sectors. Regarding the sector of maritime transport, it is worth highlighting that the Mediterranean Sea is one of the world's busiest shipping lanes of oil and gas tankers, container vessels and ships, involving a higher risk of marine oil and marine litter (ML) pollution. Although the extent of the latter is not fully understood yet, first estimations provided from Cózar et al., (2015) identify the Mediterranean Sea as a great accumulation zone of plastic debris, being comparable to the accumulation zones described for the five subtropical ocean gyres. Additionally, Soto-Navarro et al., (2021) have recently found that the hot-spots for the ML risk concentrate in the coastal regions, highly impacting on the Mediterranean biodiversity, specially, in the MPAs and, particularly, in those near ML sources.

Eliminado: Both,

Given the strategic role of ports in the globalized trading system, it is important to underline that four ports from the Mediterranean (i.e. Algeciras, Valencia, Piraeus and Marseille) are included in the top-five European ports when looking at different categories according to the Eurostat statistics from 2020. Moreover, the Mediterranean Sea hosts the three main migratory routes to Europe, representing a huge humanitarian, political and security challenge for the bordering countries. In this context, we cannot ignore the more than 99400 migrants who arrived in Europe in 2020, mainly by sea and, particularly, to Spain, Greece and Italy by crossing the Mediterranean Sea, according to the data from the International Organization for

80 Migration (IOM). This complex migratory hub contributes to the increased risk to life and maritime safety in the Mediterranean.

Last but not least, as recently reviewed by Tintoré et al., (2019), the Mediterranean is one of the most vulnerable regions in the world due to the impact of climate change. As a result of large-scale warming, among many other impacts reported by the authors, an increase in frequency and/or intensity of extreme events is expected (Mitchell et al., 2006). In this context, De  
85 Alfonso et al., (2021) points out an average of eight storms per year registered in the Spanish Mediterranean coast with particular severe events registered in November 2001 (Gómez et al., 2002), October 2007 (Cohuet et al., 2011), December 2008 (Sánchez-Arcilla et al., 2014), January 2017 and January 2020 (Amores et al., 2020; de Alfonso et al., 2021, Lorente et al., 2021a, Sotillo et al., 2021). Aiming to monitor and understand this regional and sub-regional ocean state and variability, from daily to interannual scales, a set of indicators for the Mediterranean Sea and the Balearic Islands (Juza and Tintoré, 2021) are made available through a user-friendly visualization tool by SOCIB (Tintoré et al., 2013, 2019).

The increased capability to address the above-mentioned regional challenges at the required spatio-temporal scales has directly benefited, *inter alia*, from the key features of the High Frequency Radar (HFR hereinafter) technology, i.e. unprecedented high spatio-temporal resolution (i.e. 0.2-6 km and 15-60 min) over wide coastal areas (up to 200 km offshore, depending on the operational frequency). HFRs provide continuous monitoring of the surface circulation (Lipa, Barrick and Maresca, 1981;  
95 Paduan and Graber, 1997; Headrick and Thomason, 1998; Molcard et al., 2009; Paduan and Washburn, 2013; Wyatt, 2014; Roarty et al., 2019; Dumas and Guérin, 2020), increasingly, wave parameters (Lipa et al., 1990, 2005, 2006; Gurgel et al., 2006; Wyatt et al., 2006; Orasi et al., 2018; Wyatt and Green, 2009; Long et al., 2011; Wyatt, 2011; Falco et al., 2016; Saviano et al., 2019; 2020; Basáñez et al., 2020; Bué et al., 2020) and, occasionally, wind field (Long and Trizna, 1972; Heron, 2002; Huang et al., 2004; Shen et al., 2012; Kirincich et al., 2016a; Zeng et al., 2016, 2018; Shen and Gurgel, 2018; Saviano et al.,  
100 2021). This land-based remote sensing technology gives us a unique insight to coastal ocean state and variability with relative ease in terms of technical effort, manpower and costs (i.e. for the same amount of information and compared to other conventional observing platforms), allowing us to improve our understanding of sub-mesoscale and mesoscale coastal processes.

Moreover, coastal ocean surface current and wave real-time information, which are the primary and the secondary basic  
105 products of HFRs, respectively, are being used extensively by: search and rescue (Ullman et al., 2006; Ličer et al., 2020; Révelard et al., 2021), environmental agencies for pollutant monitoring of oil spill (Abascal et al., 2009), marine litter tracking (Declerck et al., 2019), recreational activities, navigational safety, ports & shipping, ship detection and tracking (Ponsford et al., 2001; Dzvankovskaya et al., 2007; Maresca et al., 2013; Laws et al., 2016), coastal and offshore engineering applications, aquaculture, marine renewables (Wyatt, 2012; Basáñez and Pérez-Muñunzuri, 2021; Mundaca-Moraga et al., 2021) and early  
110 warning detection systems for natural hazards (Lipa et al., 2006; Gurgel et al., 2011; Grilli et al., 2015; Guérin et al., 2018), among others. Furthermore, the mapping of surface currents at high spatio-temporal resolution provided by the HFRs in the coastal strip allow us to use them as a ground truth for coastal model real-time assessment (Wilkin and Hunter, 2013; Lorente et al., 2016, 2019b; Moure et al., 2018; Aguiar et al., 2020) and improvement, through HFR data assimilation (Breivik and

Eliminado: is expected

Eliminado: offered by the High Frequency Radar (HFR hereinafter) technology in

Eliminado: P

Eliminado: ing

Eliminado: and

Eliminado: , HFR is a

Eliminado: that

Saetra, 2001; Paduan and Shulman, 2004; Barth et al., 2008; Iermano et al., 2016; Hernández-Lasheras et al., 2021), as well as for the evaluation of coastal remote sensing products (Manso-Narvarte et al., 2018; Caballero et al., 2020; Gommenginger et al., 2021). The development of advanced HFR data products as the gap-filled nowcasts and Lagrangian trajectories, allow us to satisfactory estimate the transport making the HFR data a key asset in the assessment and protection of the coastal marine environment including: dispersal/retention of particles (Cianelli et al., 2017; Hernández-Carrasco et al., 2018a; Davila et al., 2021), cross-shelf exchanges and transport (Sciascia et al., 2018), eddy tracking (Nencioli et al., 2010; Bagalini et al., 2020) and 3D eddy characterization (Manso-Narvarte et al., 2021).

In addition to this, many strong coordinated efforts to significantly increase the prompt distribution, availability, easy access and accuracy of HFR data have been made in recent years at the global (Roarty et al., 2019), European (Rubio et al., 2017) and regional levels (Lorente et al., 2021b), also leveraged by national initiatives and specific projects. These joint efforts have enhanced the creation of a community at the HFR operator level, accelerating therefore the speed of the take up of the data, also underpinning the growth of HFR multidisciplinary applications worldwide (Fujii et al., 2013; Paduan and Washburn, 2013; Wyatt, 2014; Rubio et al. 2017 and Roarty et al., 2019).

These wide range of applications have also boosted the positive trend on the HFR installation all around the world. Consistently, HFRs are also nowadays playing a crucial role as one of the backbones of the Coastal Ocean Observing Systems -COOS- of the Mediterranean Sea, which are currently encompassing more than the half of the existing HFR systems installed in Europe (Lorente et al., 2021b), constituting therefore an important focus of HFR activity.

Demonstrating the potential of the HFR observing and monitoring regional capabilities, this work reviews the existing mature and emerging scientific and societal applications using HFR data, developed to address the major challenges identified in the Mediterranean coastal waters, organized around three main topics: (i) maritime safety; (ii) extreme hazards and (iii) environmental transport processes. Recognizing also the added value of networking, it is worth highlighting that this review encompasses the main outcomes of multidisciplinary, international and intersectoral regional coordinated efforts in the frame of the Mediterranean Operational Network for the Global Ocean Observing System (MONGOOS) HFR Task Team. These endeavors are primarily focused on meeting end-users and science-driven requirements, aiming to unlock HFR data potential, delivering greater uptake, use and value from the data, for the benefit of the ecosystems, services and human activities of the coastal areas of the Mediterranean Sea.

This manuscript constitutes the second part of two complementary contributions, the first one providing a detailed overview of the main achievements, ongoing activities, future challenges and the roadmap towards an integrated, mature, HFR network in the Mediterranean Sea (Lorente et al., 2021b). The sections of this paper are as follows: Sect. 2 presents several HFR applications addressing science priorities and societal needs, classified in the above-mentioned three topics. Sect. 3 includes the discussion and a preliminary assessment of the capabilities of the existing HFR applications. Based on this assessment, Sect. 4 outlines the future prospects for HFR applications along with a set of key recommendations aiming to leverage the HFR data to its fullest extent, thus helping to harness the HFRs potential in the further development of operational monitoring systems at the regional level.

Eliminado: submitted to this Special Issue

Eliminado: , as described by several authors

Eliminado: et al.

Eliminado: implementation

Eliminado: submitted to this Special Issue

Eliminado: advanced

Eliminado: to

Eliminado: providing

Eliminado: ,

Eliminado: submitted to this Special Issue

Eliminado: the

Eliminado: provides

Eliminado: towards setting out future prospects,

Eliminado: maximize the contribution in the provision of the required data products and benefits needed by the socio-economically vital and often environmentally stressed coastal risk-prone areas of the Mediterranean Sea.

This contribution will help to achieve the challenges of the United Nations (UN's) Decade of Ocean Science for Sustainable Development (Ryabinin et al., 2019) and to address the transitional changes required towards the European Green Deal (Sikora, 2021). Finally, a summary and the main conclusions are provided in Sect. 5.

Eliminado: overcome

## 2 High-Frequency radar applications in the Mediterranean

This section presents the existing advanced and emerging scientific and societal applications using HFR data, aiming to address science priorities and societal needs identified in the Mediterranean coastal waters (Lorente et al., 2021b), organized around three main topics: (i) maritime safety; (ii) extreme hazards and (iii) environmental transport processes.

Con formato: Sin Resaltar

### 2.1 Maritime Safety

Around 200.000 large vessels operate annually in the Mediterranean Sea, including ferries, cargo and commercial vessels, of which around 300 tankers transport oil-based products every day accounting for more than 350 million tons per year (more than 25% of the world's oil tonnage) as highlighted by Di Muccio et al., (2020). This intense maritime traffic makes the basin a susceptible area in terms of oil spills, search and rescue (SAR) operations and other maritime emergencies. Over the past half century spills over the sea from tankers have shown a downward trend, reaching its lowest in early 2020 due to the global health and economic crisis triggered by the COVID-19 pandemic (March et al., 2021). However, oil spills as well as chemical spills and other hazardous substance releases are still present, putting marine health at risk. For instance, in the second half of February 2021, around 170 km of coastline from Israel to southern Lebanon suffered from a large oil spill (García-Sánchez et al., 2022), one of the worst ecological disasters in decades. In this context, accurate forecasting of oil spill modeling (for this particular event, the model MEDSLIK-II was used, as described in De Dominicis et al., 2013a, 2013b) and Lagrangian trajectory analysis of floating objects (Sayol et al., 2014; Ličer et al., 2020) have demonstrated to successfully help marine SAR operations and oil spill containment. These forecasts depend strongly on the accuracy of the forcing data (i.e. wind, waves and currents, as stated in Sect. 2.1.2) ingested in atmospheric and oceanographic models, where in particular ocean surface currents maps from HFRs can greatly improve short-term model outputs due their high resolution and their near-real time nature (Abascal et. al., 2009; Abascal et. al., 2012; Breivik et al. 2013), as described in Sect. 2.1.3. In this context real-time HFR data was accepted as a reliable operational tool for SAR, oil spill and other operational protocols in coastal waters (Roarty et al., 2019). Concerning the last two sections, it is important to mention the wider implementation of the ocean models and the short-term predictions in other cross-cutting areas from the three addressed main topics. Nevertheless, we have included them in this section to highlight the HFR strengths for SAR applications through model assessment and improvement, backtracking and short term forecasting.

Eliminado: it has once again been demonstrated how

Eliminado: can

Eliminado:

Eliminado: highly

Eliminado: its

Eliminado: its

#### 2.1.1 Search and Rescue

Agencies in charge of SAR operations, marine pollution response and maritime traffic control are among the most significantly

210 targeted users of reliable met-ocean information. Access to multi-platform quality control~~led~~ near real-time met-ocean observations and high-resolution forecasts available for their specific areas of responsibility for marine SAR, assigned by the IMO (International Maritime Organisation), is essential for them to support emergency response missions. Winds, waves and surface currents observations and forecasts are needed to be seamlessly integrated into their SAR emergency ~~tools~~, in order to predict ~~the trajectory of a drifting target for determining the optimal search region~~. In the sphere of maritime safety, HFRs

215 have the great advantage of providing high spatio-temporal resolution surface currents in wide coastal areas, very close to the coastline when HFR gap-filling methods are applied (listed in Sect. 2.1.3) and where most of the SAR incidents occur (as shown by the Fig. 1), as the review of the location of the SAR incidents from 5 countries (i.e. Croatia, France, Italy, Slovenia and Spain) along 2019 and from Malta along 2020, clearly shows:

(i) Croatia: 612 SAR interventions were registered in 2019, ~~of which 389 are SAR interventions and 223 are MEDEVAC ones~~ (i.e. actions related to transportation of injured or sick persons). Most of these incidents occur during summer, from June to September and over 98% in inner and territorial waters. Coastal waters from Croatia are operationally monitored by the HFR-SPLIT Wera Radar System, consisting of 2 WERA HFR sites (Ražanj and Stončica) in the eastern part of the eastern mid-Adriatic basin. The HFR-NASCUM system is a historical network located in the eastern part of the Gulf of Venice. All 4 sites were used to build NEURAL project short term predictions (described in Sect. 2.1.3).

225 (ii) France: ~~has 5 SAR responsibility areas in the continental littoral coordinated by 340 SAR operators from the 5 Maritime Rescue Coordination Centre, including 1 for the French Mediterranean responsibility area~~. In 2019, a total of 13507 SAR incidents occurred (with 22313 people assisted), ~~of which 51% were from June to September, as indicated in the website of the French Ministry of the Sea~~. In particular, ~~the number of SAR incidents in the French Mediterranean responsibility area accounts for 23% (3110) of the total number of cases and 32% (7293) of the people assisted, as included in the 2019 activity report of the French Mediterranean Coordination Center~~. 94% of the SAR incidents occur in coastal areas in the first 12 nm (22.2 km) and mostly during summer season (from June to September), ~~with more of the 89% related to recreational boating and sailing~~. Currently, two HFR networks are operating in the French Mediterranean coastal waters of Nice and Toulon, named HFR-MedTln and HFR-MedNce.

(iii) Italy: SAR operations are under the responsibility of the Italian Coast Guard covering 500000 km<sup>2</sup> of sea and 8000 km of coast. In 2019 the Italian coast guard responded ~~to 1875 SAR missions, 226 of them related to human migration~~. SkyTruth, a non-governmental agency reported one spill 60 km south of Genoa in the Ligurian sea. ~~Six HFR networks are currently monitoring the coastal areas of the Tyrrhenian and Ligurian Sea (HFR-TirLig) and the Tuscan Archipelago (HFR-LaMMA), Gulf of Naples (HFR-GoN), the Malta-Sicily Channel (HFR-CALYPSO), the Northern Adriatic Sea and the Gulf of Trieste (HFR-NAdr) and the recently deployed in the southwest of Sicily island (HFR-SIC)~~. ~~Two additional HFR networks in the Gulf of Manfredonia (HFR-GoM) and the Gulf of Venice (HFR-NASCUM) are historical deployments~~.

240 (iv) Malta: there is one Maritime Rescue Coordination Centre with around 50 SAR operators, covering one Search and Rescue Region (SRR) of 267874 km<sup>2</sup> with 196.8 km coastline (including Comino & Gozo). During 2020, 429 missions were coordinated by the MRCC (Maritime Rescue Coordination Centre) in Malta, 26% of which were reported as SAR cases.

Eliminado: response  
Eliminado: and environmental modelling tools  
Eliminado: oil spill drift and fate or the trajectory of a  
Eliminado: aiming to  
Eliminado: e

Eliminado: from

Eliminado: accounts with  
Eliminado: being the  
Eliminado: P  
Eliminado: ly  
Eliminado: (covering 115000 km<sup>2</sup>), the number of SAR incidents

Eliminado: a  
Eliminado: the  
Eliminado: The  
Eliminado: being  
Eliminado: for

Eliminado: No oil spills were reported as for 2019 by the Italian MISE (Ministero dello sviluppo economico) whereas spills from other sources were not officially reported.

Eliminado: Five  
Eliminado:  
Eliminado: , while  
Eliminado: t  
Eliminado: ,  
Eliminado: ,

Eliminado: , being also another new deployment (HFR-SIC) in a planned stage  
Eliminado:  
Eliminado: ,

occurring within Maltese Territorial Seas. The HFR-CALYPSO monitors the Malta-Sicily channel, accounting for 7 HFR sites and the HFR-CALYPSO-SOUTH, is composed by two HFR sites located in the South of Malta. HFR data are combined with forecast model outputs to get the best representation of the sea state during SAR operations.

(v) Slovenia: has 42 km of coastline and a semi-enclosed coastal area. During 2019, the SAR agency has responded to 9 SAR missions (7 times the rescue boat went out to sea while 2 rescues were of injured people on a moored boat in port). All cases occurred within the 3 nm from the coast (i.e. 3 within 200 meters, 3 around 1 nm and 1 at 3 nm from the coast). The HFR-NAdr, in the Northern Adriatic Sea and the Gulf of Trieste, is jointly operated through trans-national collaboration with Italy.

(vi) Spain: the 4 SAR responsibility areas cover 1 500 000 km<sup>2</sup> of marine surface (3 times the size of the Spanish national territory) and 8 000 km of coastline. The Spanish Maritime Safety and Rescue Agency (SASEMAR hereinafter) is divided in 19 MRCCs plus 1 National Centre, with more than 370 SAR operators. SASEMAR responded to 5 891 missions in 2019, of which almost 88% were SAR operations. Fifty percent of the total SAR incidents occurred within 3 km off the Spanish coastlines. Of the 7 HFR networks operating inside their 4 responsibility areas, 3 of them are located in the Western Mediterranean, monitoring the Strait of Gibraltar (HFR-Gibraltar), the Ebro Delta (HFR-Ebro) and the Ibiza Channel (HFR-Ibiza) and all of them are integrated in the SASEMAR Environmental Data Server.

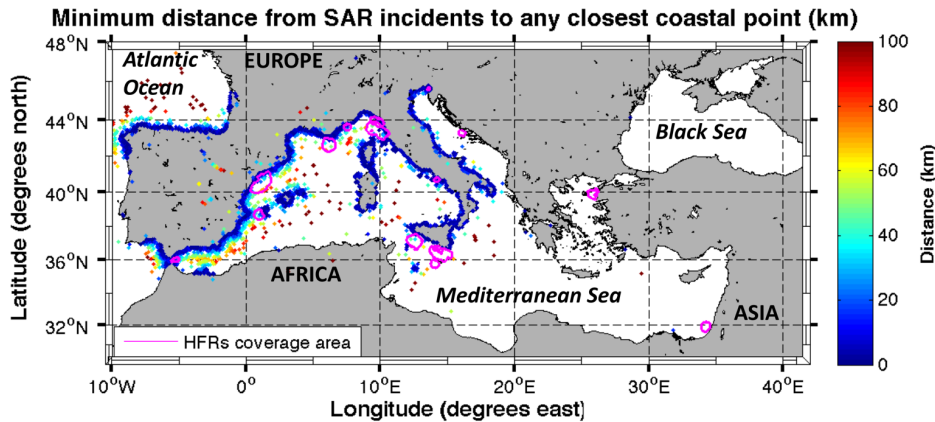

Figure 1. Map of the Mediterranean showing the HFR mean spatial coverage (pink contours) and the location of SAR incidents of France, Italy, Slovenia and Spain from 2019 colored based on their distance to the closest coastal point. For further details about the operational status and the names of the HFR systems the reader is referred to Lorente et al. (2021b).

As aforementioned, maritime SAR operations most often depend on leveraging Lagrangian tracking tools using timely and reliable knowledge of surface circulation, near surface winds and, if applicable, surface gravity waves. Surface circulation is generally provided by numerical circulation models but HFR observations can offer valuable insight into marine conditions

- Eliminado: ed
- Eliminado: the
- Eliminado: which
- Eliminado: s
- Eliminado: ,
- Eliminado: 4 around the Malta island and 3 more in the Sicilian southern coast
- Eliminado: The
- Eliminado: together with the outcome of
- Eliminado: ing
- Eliminado: are served by the Physical Oceanography Research Group being used for
- Eliminado: from
- Eliminado: (being the 12% in response to issues related to marine pollution)
- Eliminado: From
- Eliminado: of the

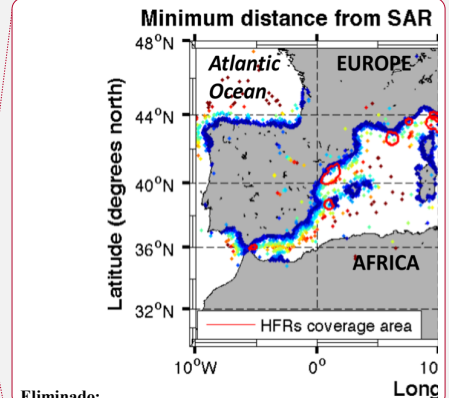

- Eliminado:
- Con formato: Revisar la ortografía y la gramática
- Con formato: Justificado
- Eliminado: bounding boxes
- Eliminado: HFR bounding boxes are shown with red boxes.

over the region of the accident and can - especially when coupled to short term prediction models (see Sect. 2.1.3) - act as a complementary input for Lagrangian predictions, hindcasts or back-tracking simulations. Révelard et al. (2021) evaluated the use of HFR-derived trajectories to complement drifter observations for assessing the performance of different models (i.e. GLO-, IBI- and MED-MFC, provided by the Copernicus Marine Service and WMOP) in predicting Lagrangian trajectories. They used the Skill Score (SS) metric, based on the Normalized Cumulative Lagrangian Separation distance (Liu and Weisberg, 2011), which is a commonly used metric for assessing Lagrangian performance. They have concluded that whereas drifters only provide assessment along their drifting paths, HFR allows for a large number of trajectories, improving not only the robustness of the Skill Score statistics but also the spatial and temporal assessment of the model performance (Fig. 2). Since HFR data are quasi-continuous in time, this method can be applied in near-real-time, which is a strong advantage for evaluating extremely scenario-dependent models. Indeed, the quality of any numerical model performance varies with time and can have substantial fluctuations on short temporal and spatial scales even if the model otherwise exhibits good overall forecasting skills. In cases like these, quality controlled HFR observations represent particularly valuable short-term inputs for Lagrangian products assisting SAR efforts.

Aiming to improve the applicability of this model assessment methodology for SAR operations in coastal areas, Révelard et al. (2021) also analyzed the SS sensitivity to different forecast horizons and showed that, in coastal regions: (i) the SS is sensitive to the forecast time, i.e. the longer the forecast (i.e. 72 hours), the higher the SS value, due to the high variability of the surface currents; (ii) a shorter forecast time (e.g. 6 hours), consistent with the duration of the search that maximizes survivors in SAR missions, is therefore more appropriate. In addition, they have shown that whereas the original definition of the Skill Score from Liu and Weisberg (2011) is correct for analyzing its spatiotemporal distribution, the use of a novel Skill Score (SS\*) is recommended to assess the average model performance over an area of interest and along a specified period to avoid biased conclusions. The advantage of the SS\* is that, despite its similar formulation to the SS, defined by Liu and Weisberg (2011), SS\* does not impose the negative values to zero, allowing to obtain a correct average, as in Fig. 2. However, they clarified that only SS\* values > 0.5 should be interpreted as a good agreement between HFR surface current observations and model outputs.

Eliminado: shown

Eliminado: obtaining

Eliminado: Skill Score

Eliminado: , where most of the SAR incidents occurred in the Mediterranean Sea, an overly long

Eliminado: can lead to an overestimation of the Skill Score

Eliminado: .

Eliminado: A

Eliminado: of

Eliminado: when using HFR as the observing reference

Eliminado: it is not adequate if averages are going to be applied afterward, because of the previous imposition of the negative values to zero. In the aim of estimating the relative average performance of different datasets over an area and/or period, they introduced the novel Skill Score SS\*

Eliminado:

Eliminado: T

Eliminado: is

Eliminado: as

Eliminado: in

Eliminado: but without the

Eliminado: ition

Eliminado: of

Eliminado: where the SS\* is temporally averaged over a period of 6 hours

Eliminado: as pointed out in Révelard et al. (2021),



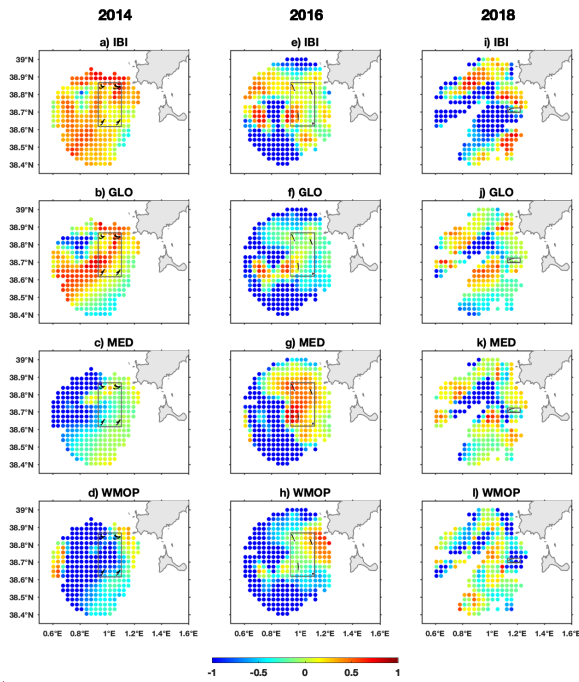

Con formato: Revisar la ortografía y la gramática

Figure 2.: Temporally averaged Skill Score  $SS^*$  obtained for four models as indicated in the title of each panel, by comparing against the HFR-derived trajectories of the Ibiza Channel during a forecast time of 6 hours. Simulated trajectories are initialized hourly at each grid points on 30-sept-2014 from 13:00 to 16:00 (left panels), on 28-July-2016 from 16:00 to 22:00 (middle panels) and on 15-Nov-2018 from 13:00 to 16:00 (right panels).  $SS^*$  values, with red colors representing the higher average model performance, are only obtained in those grid points with data temporal availability equal or higher than 80%. Black lines show the drifter paths available during the same periods, and the boxes indicate the regions where the averages are applied for comparison with the results obtained with drifter observations. Original source: From Révelard et al. (2021).

Eliminado: the figure title

370

Eliminado:

A further academic study of the value of quality controlled HFR observations in SAR operations was the recent case of a person lost at sea in the Northern Adriatic during a Sirocco storm on 29 Oct 2018. In this case, HFR-NAdr observations were employed for hindcasting and survivor's drift trajectory verification (Ličer et al., 2020). Fig. 3 depicts Lagrangian drifter dispersal computed from modeled surface winds (the dominant contribution to the drift in this case) and HFR surface currents from the HFR-NAdr network in the Gulf of Trieste after this accident.

Eliminado: example

Eliminado: Sirocco

Eliminado: ure

Eliminado:

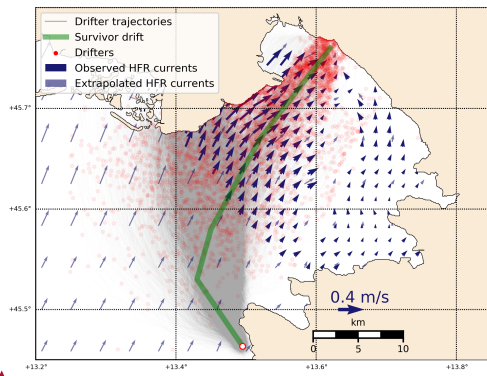

Con formato: Revisar la ortografía y la gramática

385

Figure 3. Using HFR currents for Lagrangian hindcasting of an accident on 29 Oct 2018 in the Gulf of Trieste, details in (Ličer et al., 2020). Blue arrows denote the HFR surface current field on 29 Oct 2018 22UTC. Thinner (but scaled to length) light-blue arrows depict nearest-neighbor extrapolated currents outside the HFR domain (every third point is plotted for clarity). Red dots denote modeled virtual drifter locations after 24 hours of the drift, starting from the accident location (white circle at 13.495 E, 45.4635 N). Green line indicates the survivor's estimate of his drift trajectory. Adapted from Ličer et al., 2020.

390

Even though in this case part of the survivor's trajectory outside of the HFR-NAdr domain had to be inferred from extrapolated currents, such HFR-based nowcasting products would have been valuable during this and similar rescue attempts. However, since HFR data arrive in near real time, some sort of model-based extension of their prediction horizon is necessary before they can be used for operational nowcasting. One possible solution is data assimilation of HFR data into a numerical model (see Sect. 2.1.2.), followed by a forecasting time window. An alternative and numerically less demanding option, gaining ground in recent years, is the machine learning approach where a neural network model is trained on past data and then used to create short term predictions of surface currents, addressed in Sect. 2.1.3.

395

### 2.1.2 Model assessment and improvement

400

This section addresses one of the main interests and needs of end-users of operational oceanography information: users want to be able to have confidence in modelled data and they need to know how good they are. Addressing end-user overarching concerns, model assessment, essentially built upon comparison to observations, is crucial to evaluate the quality of the diversity of modelling products available in a systematic and long-term routine manner, and to inform users about their usefulness for a given application.

405

For this reason, seeking also to strengthen end-user loyalty, the validation of Operational Ocean Forecasting Systems against independent measurements constitutes a core activity in operational oceanography (Hernández et al., 2015) since it aids: (i) to infer the relative strengths and weaknesses in the modelling of several key physical processes; (ii) to compare different versions

of the same operational ocean forecasting system and evaluate potential improvements and degradations before a new version is transitioned into operational status; (iii) to compare coarse-resolution “parent” and nested high-resolution “child” systems to quantify the added value of downscaling; (iv) to inform end-users about the consistency and skill of the modeling products disseminated.

410  
415  
420  
425  
430  
435  
440  
445  
450  
455  
460  
465  
470  
475  
480  
485  
490  
495  
500  
505  
510  
515  
520  
525  
530  
535  
540  
545  
550  
555  
560  
565  
570  
575  
580  
585  
590  
595  
600  
605  
610  
615  
620  
625  
630  
635  
640  
645  
650  
655  
660  
665  
670  
675  
680  
685  
690  
695  
700  
705  
710  
715  
720  
725  
730  
735  
740  
745  
750  
755  
760  
765  
770  
775  
780  
785  
790  
795  
800  
805  
810  
815  
820  
825  
830  
835  
840  
845  
850  
855  
860  
865  
870  
875  
880  
885  
890  
895  
900  
905  
910  
915  
920  
925  
930  
935  
940  
945  
950  
955  
960  
965  
970  
975  
980  
985  
990  
995

Developments in ocean modelling have clearly advanced to address the challenges associated with the increased resolution and its application to coastal areas, also responding to the high demand of providing 4D estimates of multiple oceanic variables at fine-scales (Mourre et al., 2018; Fox-Kemper et al., 2019). Coastal modeling faces numerous challenges and issues such as downscaling and representation of open boundary conditions or land-sea/air-sea interactions (Kourafalou et al. et al. 2015a). Synergies between models and ocean observations are needed to face these challenges and improve ocean processes representation (Kourafalou et al.2015b; De Mey-Frémaux et al., 2019; Davidson et al., 2019). Additionally, it is worth mentioning the current lack of real-time and historical availability of observations on the coastal areas, which limits the operational capability and reduces the potential of skill assessment operational services aiming to provide synthetic metrics addressing specific user’s needs (Révelard et al., 2021).

Eliminado:

Eliminado: , for instance

Within this context, HFR systems play a first-order role thanks to their unique ability to provide fine-resolution maps of the surface currents over broad coastal areas. This ability of the HFR system makes them particularly appropriate for the validation of numerical models in coastal areas, where other observations are scarce and/or their resolutions (i.e. in space or in time) are not high enough to capture the fine scale. Many HFR systems have therefore been used with this purpose in several regions of the Mediterranean Sea including the Northern Current area off Toulon (Berta et al., 2014a), the Ebro Delta area (Lorente et al., 2016; Ruiz et al., 2020; Aguiar et al., 2020; Lorente et al., 2021a; Sotillo et al., 2021), the Northern Adriatic (Vilibić et al., 2016), the Gulf of Naples (Uttieri et al., 2011), the Ibiza Channel (Mourre et al., 2018; Aguiar et al. 2020; Révelard et al., 2021; Sotillo et al., 2021) and the Strait of Gibraltar (Lorente et al., 2019a; Aguiar et al., 2020).

An example of this added-value of the HFR data was recently shown in the multi-model comparison exercise performed in the Strait of Gibraltar in 2017 (Lorente et al., 2019a). In that case, the JBI-MFC model (Sotillo et al., 2015) was compared against their partially nested SAMPA (Sánchez-Garrido et al., 2013) high-resolution coastal forecast system to elucidate the accuracy of each system characterizing the Atlantic Jet (AJ) inflow dynamics. To this aim, HFR-derived hourly currents at the midpoint of the selected transect (square in Fig. 4,a) were used as a benchmark. The scatter plot of HFR-derived hourly current speed versus direction (taking as reference the north and positive angles clockwise) revealed interesting details (Fig. 4, b): (i) the AJ flowed predominantly eastwards, forming an angle of 78° with respect to the north; (ii) the current velocity, on average, was 1 ms<sup>-1</sup> and reached peaks of 2.5 ms<sup>-1</sup>. Speeds below 0.5 ms<sup>-1</sup> were registered along the entire range of directions; (iii) westwards currents, albeit in the minority, were also observed and tended to predominantly form an angle of 270° (i.e. towards the Atlantic), mostly related to intense easterly winds episodes (Garret, 1983; García-Lafuente et al., 2002; Menemenlis et al., 2007; Péliz et al., 2009; Reyes et al., 2015; Lorente et al., 2019b and 2019c; Bolado-Penagos et al., 2021), as further detailed in Sect. 2.2.1. The scatter plot of SAMPA estimations presented a significant resemblance in terms of prevailing current velocity and direction (Fig. 4,c). Although the time-averaged speed and angle were slightly smaller (0.9 ms<sup>-1</sup> and greater (88°),

Eliminado: This comparison was made between the coarser

Eliminado: CMEMS-

Eliminado: and

respectively, the main features of the AJ were qualitatively reproduced: maximum velocities (up to  $2.5 \text{ ms}^{-1}$ ) were associated with an eastward flow and an AJ orientation in the range of  $50^\circ$ – $80^\circ$ . Besides, surface flow reversals to the west were properly captured. By contrast, noticeable differences emerged in the scatter plot of regional IBI-MFC estimations (Fig. 4, d): surface current velocities below  $0.3 \text{ ms}^{-1}$  were barely replicated and the AJ inversion was only observed very occasionally. Despite the fact that IBI-MFC appeared to properly portray the mean characteristics of the eastwards flow, the model tended to favor flow directions between  $60^\circ$  and  $180^\circ$  and to overestimate the current velocity, with averaged and maximum speeds around  $1.17$  and  $2.80 \text{ ms}^{-1}$ , respectively.

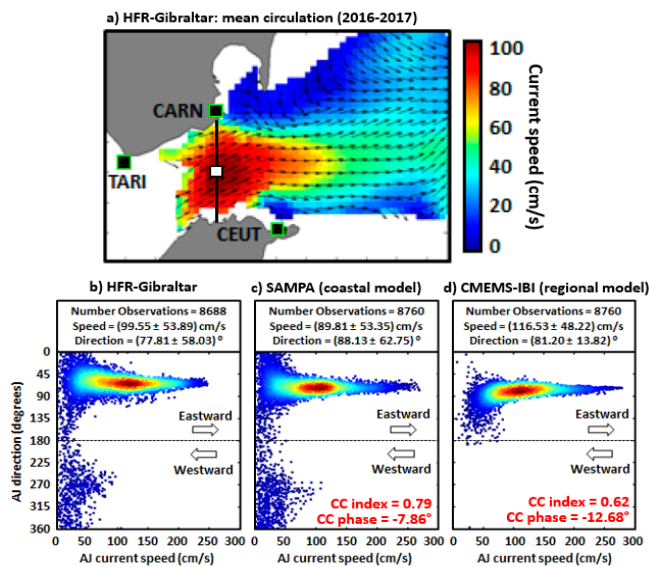

Con formato: Revisar la ortografía y la gramática

460 Figure 4. (a) HFR-derived mean surface circulation pattern in the Strait of Gibraltar for 2016–2017: classical Atlantic Jet inflow into the Mediterranean, with strong surface currents flowing to the NE. Solid black squares represent radar sites. Black line and the related white square indicate the selected transect and its midpoint, respectively. (b-d) Quantitative validation at the selected grid point (5.43°W, 35.99°N) within the Strait of Gibraltar: annual (2017) scatter plot of hourly current speed versus direction (angle measured clockwise from the north); estimations provided by HFR-Gibraltar (b), SAMPA high-resolution coastal model (c) and JBI-MFC (d), a regional model in which SAMPA is nested into. Mean and standard deviation values of both AJ speed and direction are gathered in black boxes. **Magnitudes of the complex correlation (i.e. CC index) and phase between HFR and model-predicted currents, are provided in red font color.** Adapted from: Lorente et al., 2019a.

465 In summary, HFR measurements are able to precisely assess the added value of the downscaling performed through the SAMPA coastal system with respect to the JBI-MFC regional solution, in which SAMPA is nested. Overall, a steady improvement in the Atlantic Jet characterization is evidenced in model performance when zooming from regional to coastal configurations, highlighting the benefits of the downscaling approach adopted and also the potential relevance of a variety of factors at local scale, among others: a more refined horizontal resolution, a tailored bathymetry or the higher spatio-temporal resolution of the atmospheric forcing. Furthermore, SAMPA appeared to better reproduce the reversal events detected with HFR estimations, demonstrating the added value of imposing accurate meteorologically driven barotropic velocities in the open boundaries, imported from the NIVMAR storm surge model (Álvarez-Fanjul et al., 2001), in order to consider the remote effect of the atmospheric forcing over the entire Mediterranean basin, which was only partially included in IBI-MFC.

475 During the next phase of **the Copernicus Marine Service**, the higher focus will be on coastal downstream applications (e.g., very high-resolution ocean models integrated with coastal observatories) for **a wide range of coastal stakeholders including ports, and environmental agencies.** Despite the significant progress in the field of coastal modelling, some storm-induced hazards are still not properly resolved (or even misrepresented) by ocean models due to a variety of factors (e.g. too coarse horizontal resolution, inadequate meteorological forcing, poor representation of land-sea interactions and the related river freshwater outflows, among others) as described by Sotillo et al. (2021). Within this framework, HFR might act as a monitoring cornerstone to calibrate and validate successive, upgraded versions of operational ocean forecasting models with the aim of better capturing extreme events in terms of strength, extension and timing (Lorente et al., 2021a).

480 Aguiar et al. (2020) used the three HFR systems available in the Western Mediterranean Sea (Gibraltar Strait, Ibiza Channel - described in Lana et al., 2016 - and Ebro Delta) to evaluate the impact of downscaling on the surface coastal circulation in the case of the **Western Mediterranean Operational forecasting system (WMOP)** (Juza et al., 2016; Mourre et al., 2018). The authors showed that the time-average circulation in the coastal areas of the Ebro delta and Ibiza Channel were improved through downscaling. In particular, the nested model showed a better representation of the small-scale coastal flow intensification at the mouth of the Ebro River and a refinement in the characterization of the circulation in the Ibiza Channel. Notice that HFR-Gibraltar, HFR-Ebro and HFR-Ibiza *versus* model comparisons are updated daily on SOCIB WMOP webpage [-https://socib.es/?seccion=modelling&facility=wmedvalidation-](https://socib.es/?seccion=modelling&facility=wmedvalidation). Those HFR systems, among others, are also integrated in the IBISAR science-based data downstream service (Reyes et al., 2020) –freely available under registration in [www.ibisar.es](http://www.ibisar.es)– for visualizing, comparing and evaluating the performance of ocean current predictions in the Iberian-Biscay-Irish regional seas.

Eliminado: CMEMS-

Eliminado: C

Eliminado: )

Eliminado: and phase

Eliminado: illustrated

Eliminado: CMEMS-

Eliminado:

Eliminado: CMEMS

Eliminado: specific

Eliminado: such

Eliminado: as harbors

Eliminado: model

505 IBISAR allows the identification of the most accurate ocean current dataset in a specific area and period of interest, thus facilitating decision-making to SAR operators and emergency responders. [Lorente et al., \(2021b\)](#) consider the IBISAR service as a successful example of the long-lasting engagement built in collaboration between HFR operators with end users (i.e. the [Spanish Maritime Safety and Rescue Agency](#)). Additionally, those HFR systems are also being used for the JBI-MFC model assessment purposes by means of the NARVAL multi-parameter and multi-platform validation tool (Lorente et al., 2019c) for the JBI-MFC model validation.

Eliminado: CMEMS

510 Another added-value of HFR systems is their use to improve model forecast through data assimilation (DA). DA aims at optimally combining observations and models to provide a better representation of the ocean dynamics. In this sense, HFR provides very valuable high-resolution observations in areas where satellite observations tend to suffer limitations due to the vicinity of the coast (Vignudelli et al., 2019). While the assimilation of HFR measurements has been applied in many regions of the world since the first studies from Breivik (2001) and Oke et al. (2002), only a limited number of studies have been

Eliminado: CMEMS

515 performed in the Mediterranean Sea. Marmain et al. (2014) assimilated radial [velocity](#) observations from Toulon HFR system in a regional model in the Gulf of Lion. They showed how HFR observations can be successfully used to correct the wind forcing used to constrain the model coastal surface circulation. In the Ligurian Sea, Vandenbulcke et al. (2017) were able to correct surface currents and improve the representation of inertial oscillations after the assimilation of all the available hourly radial observations in a regional model of the area. Variational methods were also applied to improve model dynamics through

520 multi-platform data assimilation including HFR in the southern Tyrrhenian Sea (Iermano et al., 2016) and in the Adriatic Sea (Janeković et al., 2020).

Eliminado: s

More recently, Hernández-Lasheras et al. (2021) specifically assessed the impact of assimilating HFR observations on the surface currents in the Ibiza Channel using the WMOP operational system. They compared the performance of both radial and total daily mean HFR-Ibiza surface currents (Tintoré et al., 2020) for correcting meso and submesoscale circulation using

525 different initialization methods in an operational-like context. An independent Lagrangian validation performed by comparing non-assimilated, assimilated without and with HFR measurements with a set of 14 surface drifters (Tintoré et al., 2014) showed that the best results were obtained when using HFR total observations along with the traditional observation sources (i.e. satellite altimetry, [sea surface temperature \(SST\)](#) and Argo temperature and salinity profiles). After 48 hours, the mean separation distance between virtual buoys and real drifters was reduced by 53% compared to the simulation without any data

530 assimilation, and by 29% compared with the simulation assimilating traditional observations only (as shown in the Fig. 5).

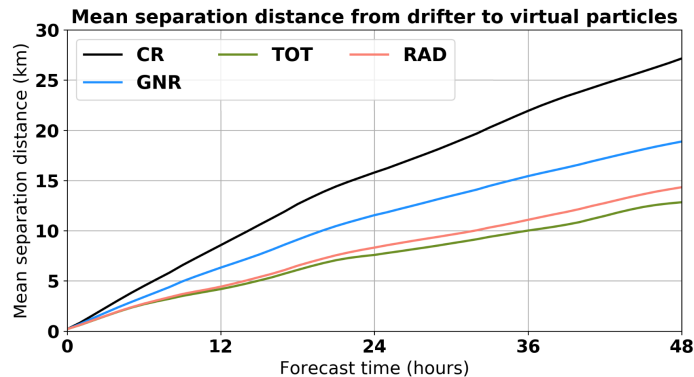

535 Figure 5. Mean separation distance between virtual particles and drifters as a function of the forecast horizon. **Black** color represents the simulation without DA (i.e. control run, CR). Blue stands for generic (GNR), which assimilates data from satellite altimetry, SST and Argo profiles. Green and red lines represent the simulation which assimilates HFR daily mean total (TOT) and radial (RAD) observations, respectively, together with generic observation sources. Original source: Hernández-Lasheras et al. (2021)

540 To the best of authors' knowledge, SOCIB WMOP (<https://socib.es/?seccion=modellling&facility=forecast>) is presently the only system in the Mediterranean Sea including an assimilation scheme of HFR data in its operational chain.

### 2.1.3 Short Term Predictions

545 Assimilation of HFR data into models is still computationally expensive and a complex issue, not to mention operational capabilities of such a procedure. Because of these constraints, the availability of real-time high-resolution HFR current fields has led to alternative solutions in order to obtain short term prediction (STP) of surface coastal currents, through the direct use of HFR historical and nowcast observations using different approaches (e.g. Zelenke 2005; Frolov et al. 2012; Barrick et al., 2012; Orfila et al. 2015; Vilibić et al., 2016).

550 The above-mentioned studies develop and implement different STP approaches (harmonic analysis of the last hours, genetic algorithms, numerical models, etc.) which often require additional data, or long training periods of data without gaps. Hardware failures due to power issues, communications or environmental conditions often result in spatio-temporal gaps within HFR datasets. Spatial gaps can be filled on a real-time basis but the filling of long temporal gaps is not straightforward. Several gap-filling methodologies have been developed for HFR data sets: Open Modal Analysis – OMA - (implemented by Lekien et al., 2004 and further optimized by Kaplan and Lekien, 2007), Data Interpolating EOFs -DINEOF- (Beckers and Rixen, 2003; Alvera-Azcárate et al., 2005; Hernández-Carrasco et al., 2018b, Bourg and Molcard, 2021), Self-Organizing Maps -SOM- (Kohonen, 1982, 2000, 2001; Hernández-Carrasco et al., 2018b), Reduced Order Optimal Interpolation -ROII- (Kaplan et al.,

Con formato: Revisar la ortografía y la gramática

Eliminado: Blue

Eliminado: (generic)

Eliminado: and

1997), Optimal Interpolation -OI- (Kim et al., 2008), Artificial Neural Network -ANN- (Ren et al., 2018), Variational Analysis (Yaremchuk and Sentchev, 2011) and Data-Interpolating Variational Analysis in n-dimensions -DIVAnd- (Barth et al., 2021). HFR derived short term predictions were developed by Zelenke (2005), Frolov et al. (2012), Barrick et al., (2012), Orfila et al. (2015), Solabarrieta et al., (2016), Vilibić et al. (2016), Abascal et al., (2017). More recently, Solabarrieta et al. (2021), developed a Lagrangian-based empirical real-time, Short-Term Prediction (L-STP) system in order to provide short term forecasts of up to 48 hours of ocean currents from HFR data.

Through the NEURAL project (<http://www.izor.hr/neural>), an innovative neural network-based ocean forecasting system has been developed, providing gridded hourly surface current forecasts in the northernmost part of the Adriatic for the next 72 hours. The forecasting system is using an unsupervised neural network algorithm, Self-Organizing Maps (SOM, Kohonen, 1982; Liu et al., 2006), to train joint solutions coming from the HFR measurements and numerical weather prediction model as hourly surface currents and surface winds, respectively. Once the joint SOM solution has been trained, the surface current forecast follows the predicted surface winds being the closest to the specific SOM solution (Fig. 6). Such a system requires a strong relationship between the predictor (i.e. surface winds) and the predictand (i.e. surface currents), which is largely found in coastal regions of the Mediterranean, yet it can be applied for any other combination of predictors and predictands. Also to add, high-frequency processes such as tides are removed from the system as being minor to the wind-driven dynamics, yet the tides can be added to the forecast.

The quoted northern Adriatic forecast system has been trained using 20 SOM solutions (so-called Best Matching Units, Liu et al., 2006) on HFR data measured between February and November 2008 conjoined with 3-hourly surface winds interpolated to 1-hour resolution coming from Aladin/HR operational model run once a day by the Croatian Meteorological and Hydrological Service (Tudor et al., 2013). The forecasting system performance has been tested in the forecast (hindcast) mode during 2009 and 2010. Unfortunately, the HFR system has had substantial problems since 2010 and the antennas were eventually removed in the following years, resulting in a relatively short dataset possibly not sufficient to put a strong reliability to the forecasting system solutions. However, Vilibić et al. (2016) compared this SOM-based surface current forecast system (available online in <http://jadran.izor.hr/neural/about.htm>) with the operational ROMS -Regional Ocean Modelling System- (Shchepetkin and McWilliams 2003, 2005) ocean model for the Adriatic, showing the former lower biases and root-mean-square errors.

Eliminado: ;

Eliminado:

Eliminado: ,

Eliminado: ,

Eliminado:

Eliminado: prerequisites

Eliminado: here

Eliminado: here

Eliminado: , while

Eliminado: ing

Eliminado: and found that the SOM-based forecasting system performed better, having



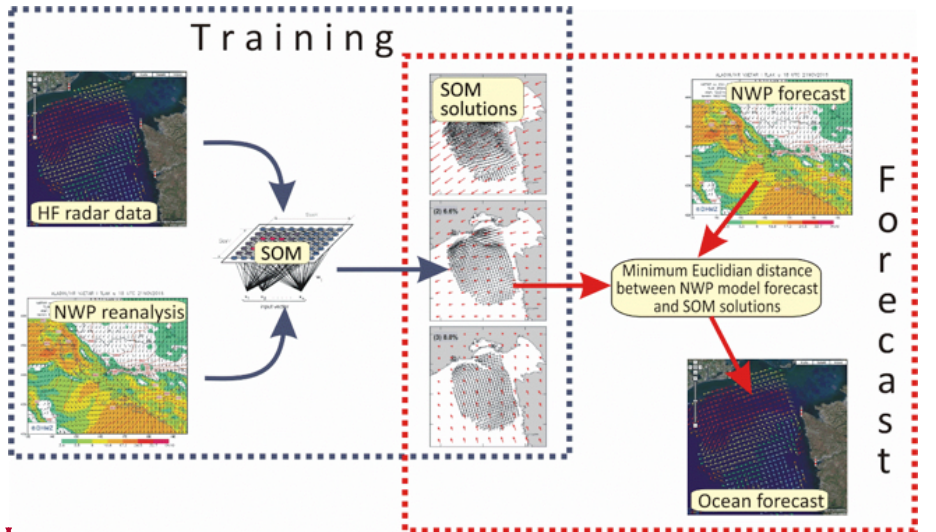

Figure 6. The architecture of the SOM-based surface currents forecasting system in the northern Adriatic. Original source: from Vilibić et al., 2016.

## 600 2.2 Extreme hazard coastal monitoring

Under the current climate-change scenario, no portion of the coastline is safe from the threat of meteocean hazards, which are expected to increase in frequency, duration and virulence during this 21<sup>st</sup> century (Mitchell et al., 2006; Stott, 2016). HFR constitute a profitable asset for wise decision-making since it presents a wide range of practical applications, including the effective monitoring in near real time of extreme coastal hazards, such as: (i) extreme wind events; (ii) severe river discharges; (iii), record-breaking storms and (iv) strong flow reversals (all above-mentioned events are addressed in Sect. 2.2.1); (v) storm surges; (vi) tsunamis (in Sect. 2.2.2); (vii) typhoons and hurricanes (Barrick and Lipa, 1986; Miles et al., 2017; Lipa et al., 2019).

610 In response to the increasingly frequent extreme events associated with climate change, their detailed characterization by means of surface current, waves and wind maps derived from HFRs may aid the Blue Economy development in coastal vulnerable areas of the Mediterranean region. Regardless of this, the increasing retrieval of waves and winds maps derived from HFRs (Lorente et al., 2021b), is very relevant for the development of renewable ocean energy, an emerging and innovative Blue Economy sector.

**Eliminado:** As HFR measurements expanded a lot in the last decade, both in space (new HFR systems) and time (longer time series), such a forecasting system that uses self-learning algorithms might be applied to other Mediterranean locations, in particular to those having multi-year surface current datasets. For such sites, the stability of SOM-solutions in time may be tested as well, or the self-learning and training of SOM solutions might change in time to properly reflect long-term changes in oceanographic conditions in a coastal area.

**Con formato:** Revisar la ortografía y la gramática

**Eliminado:** ,

**Eliminado:** ,

**Eliminado:** see further details

**Eliminado:** ,

**Eliminado:** ,

**Eliminado:** more information available

**Eliminado:** ,

**Eliminado:** A

**Eliminado:** of unusual phenomena

**Eliminado:** as well as

**Eliminado:** ly

**Con formato:** Sin Resaltar

**Eliminado:** emerging and innovative

**Eliminado:** s, including marine renewable energy, among others

### 2.2.1 Extreme events monitoring

HFRs have been used to investigate the upper ocean response to an extreme wind event in the Ligurian Sea (NW Mediterranean) during October-November 2018, as described in Berta et al. (2020). This work focused on the analysis of coastal submesoscale structures, shaping surface currents and passive transport. Authors estimate the pattern and magnitude of kinematic properties (e.g. divergence/convergence and vorticity patterns), derived from surface currents measured by the HFR-TirLig network (Fig. 1) to characterize the evolution (before and after the event) of ocean scales at a few kilometers.

During the storm, sea surface vorticity (Fig. 7, top panels) and divergence (not shown but available in Berta et al., 2020) reach order of the Coriolis parameter  $f$ , indicating ageostrophic activity typical of submesoscale structures. The evolution of the sea surface structures suggested nonlinear interactions with the wind forcing. Considering the time series of wind speed and sea currents properties (Fig. 7, lower panels), during and right after the storm (around October 29), currents magnitude increased approximately four times while vorticity and divergence associated with the small features almost doubled. Such abrupt changes in horizontal currents and transport might impact also the vertical properties and in turn the ecosystem.

- Eliminado: response of coastal submesoscale structures, shaping surface currents and passive transport,
- Eliminado: , a sub-basin in the North-Western Mediterranean
- Eliminado: The analysis
- Eliminado: was based on
- Eliminado: estimates
- Eliminado: '
- Eliminado: pattern and magnitude
- Eliminado: before and after the extreme wind event. In particular this work focused on divergence/convergence and vorticity
- Eliminado: ation indicative of

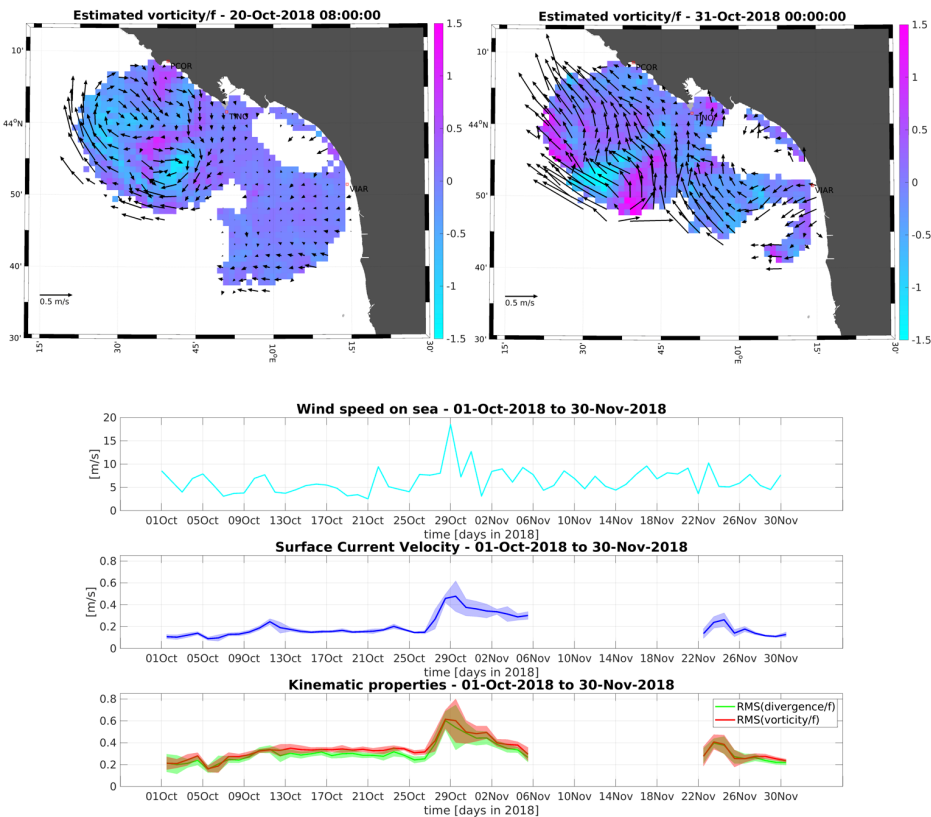

Con formato: Revisar la ortografía y la gramática

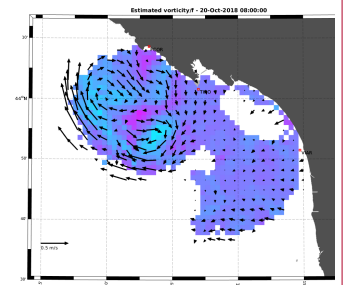

Eliminado:

... [1]

Con formato: Revisar la ortografía y la gramática

Con formato: Revisar la ortografía y la gramática

Con formato: Revisar la ortografía y la gramática

Eliminado: , also in the

Eliminado: orth-

Eliminado: estern

Eliminado: coast

Eliminado: and the high impact of the freshwater-pulse discharged on the surface circulation pattern

Eliminado: that

Eliminado: the surface circulation pattern is highly influenced by the river discharge,

660

Figure 7. From top to bottom: example map of normalized vorticity before/during the extreme event. Time series of wind speed, surface currents magnitude, and RMS of normalized vorticity and divergence. Original source: from Berta et al., 2020.

In the Delta of the Ebro river (NW Mediterranean), the HFR-Ebro system observations have been crucial to capture the evolution of the most extreme Ebro river freshwater discharge event registered over the last 15 years in April 2018 (Ruiz et al., 2020). Results show the high impact of the freshwater-pulse discharged on the surface circulation pattern, exhibiting a clear correspondence with high concentrations of satellite-derived Chlorophyll-a (Chl-a hereinafter) concentration. Hovmöller diagrams of HFR derived meridional and zonal currents indicate an increase of the south-eastward velocity during the period

665

of the extreme river discharge. The proper representation of the basic oceanographic features of the HFR-Ebro, as the Ebro river impulsive-type freshwater discharged, was previously reported by Lorente et al. (2015).

680 This same region (i.e. Delta Ebro) has been severely impacted by an exceptional storm in January 2020 (19-24), which  
surpassed the 99th percentile for several parameters (i.e. wind speed, significant wave height, wave period and surface current  
685 velocity), compared with the climatology and with a previous storm in January 2017. Particularly for this event, Lorente et al.  
(2021a) have assessed the ability of the HFR-Ebro to characterize waves and currents under the record-breaking storm Gloria.  
By analyzing the data from the HFR-Ibiza and HFR-Gibraltar, authors have also evidenced Gloria's remote-effect in the Ibiza  
690 Channel and the Strait of Gibraltar, altering the usual water exchanges between adjacent sub-basins. Furthermore, the effect  
of Gloria was also manifested on the highest rates of particle dispersion at the Ebro river mouth on the 21st of January.  
As in the previous case, the HFR system strategically installed in the Strait of Gibraltar (SoG) is considered an appropriate  
asset to effectively monitor the Atlantic Jet (AJ) inflow (Lorente et al., 2019b) and the water exchanges between the Atlantic  
695 Ocean and the Mediterranean Sea. The classical picture of the surface circulation is characterized by current pulses often  
exceeding 2  $\text{ms}^{-1}$  and time-averaged north-eastward speeds around 1  $\text{ms}^{-1}$  in the narrowest section of the SoG (Fig. 4, a).  
Complete collapse of the AJ and quasi-permanent inversion of the surface inflow during prevalent intense easterlies is a  
singular phenomenon that deserved detailed exploration (as previously mentioned in Sect. 2.1.2). Under this temporal premise,  
a monthly Hovmöller diagram was computed for HFR-derived zonal currents at the selected transect to easily detect a 2-day  
full reversal episode during March 2017, represented by black boxes in Fig. 8, a. The event detected consisted of an abrupt  
700 interruption of the eastward inflow and complete reversal of the surface stream through the narrowest section of the SoG (Fig.  
8, b). The circulation in the easternmost region of the study domain was accelerated up to 0.8  $\text{ms}^{-1}$ , following clockwise rotation  
that likely fed the Western Alboran Gyre (WAG), which was out of the picture.  
The prevailing atmospheric synoptic conditions were inferred from ECMWF predictions of sea level pressure and zonal wind  
at 10 m height (U-10), as shown in Fig. 8, c-d. A significant latitudinal gradient of sea level pressure was observed, with high  
705 pressures over the Gulf of Biscay and isobars closely spaced in the SoG, leading to extremely intense easterlies (above 10  $\text{ms}^{-1}$ ),  
channeled through the Strait due to its specific geometric configuration. Therefore, high pressures and intense, permanent,  
and spatially-uniform easterlies prevailed over the entire study domain, inducing a westward outflow through the SoG as  
revealed by the 2-day averaged HFR circulation maps. Local wind forcing at this scale seemed to play a primary role in  
explaining such AJ collapse and the related inflow reversals in agreement with previous studies (Garret, 1983; García-La Fuente  
710 et al., 2002; Menemenlis et al., 2007; Péliz et al., 2009; Reyes et al., 2015; Lorente et al., 2019b, 2019c; Bolado-Penagos et  
al., 2021).

Eliminado: recently

Eliminado: (19-24 January 2020)

Eliminado: and

Eliminado: its

Eliminado: adjacent choke-points of the NW-Mediterranea

Eliminado: n

Eliminado: , adding to the analyzing the data from the HFR-Ibiza and HFR-Gibraltar

Eliminado: 's

Eliminado: 's

Eliminado: has been established. The main findings are the identification of: (i) the storm Gloria as an extreme event in the NW Mediterranean Sea, considering the persistent surpassing of the 99th percentile for several parameters (i.e. wind speed, significant wave height, wave period and surface current velocity) in relation to the climatology and to a previous storm in the same region (in January 2017); (ii) the remote effects of the Gloria storm in the Ibiza Channel and the Strait of Gibraltar, which altered the usual water exchanges between adjacent sub-basins. Specifically, the flash pressure drops of about 18 hPa in 27 hours in the Ibiza Channel causes very strong easterly winds of about 11  $\text{ms}^{-1}$  by the end of the 19th January. As a result, surface current speed reached its monthly maximum of 0.6  $\text{ms}^{-1}$ , showing a clockwise veering from NE, to SW during the storm and to NW afterwards. In the Strait of Gibraltar, the Atlantic Jet speed decreased one third and the HFR registered a uniform inversion of the surface circulation with westwards currents above 0.7  $\text{ms}^{-1}$  on the 20th of January. In the HFR-Ebro system the maximum current speed of about 0.87  $\text{ms}^{-1}$  was registered on the 21st of January towards the S-SW, surpassing all values, i.e. the mean value of about 0.16  $\text{ms}^{-1}$ ; the P99 of ~0.34  $\text{ms}^{-1}$ , being more than twice the mean and the peak value of 0.53  $\text{ms}^{-1}$  registered during the severe 2017 event (iii) areas of elevated instantaneous rate of separation

Eliminado: 21st

Eliminado: Strategically located at the only natural entrance from the Atlantic Ocean to the Mediterranean Sea

Eliminado:

Eliminado: can be

Eliminado: to be

Eliminado:

Eliminado: S

Eliminado: .

Eliminado: S

Eliminado: .

a) Hovmöller diagram at selected transect

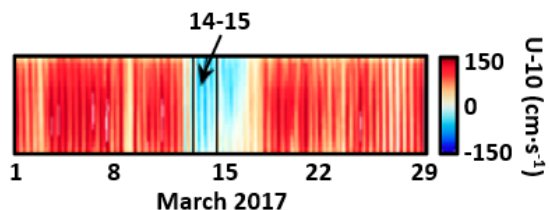

c) Mean sea level pressure

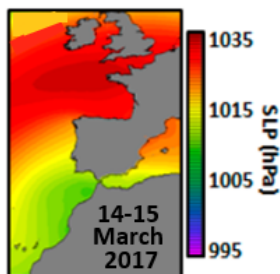

b) Mean circulation (14-15 March 2017)

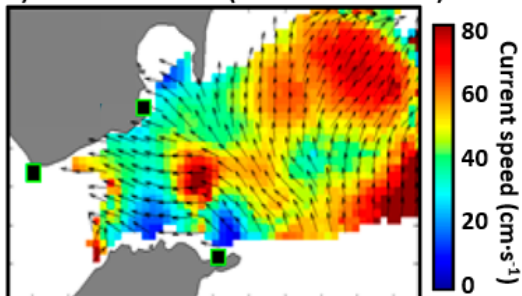

d) Mean zonal wind at 10 m

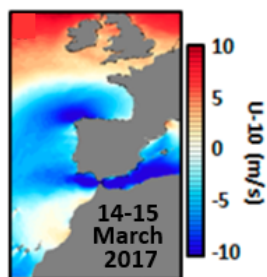

Con formato: Revisar la ortografía y la gramática

785 Figure 8. (a) Monthly Hovmöller diagram of HFR-derived zonal current speed at the selected transect (shown in Figure 4. a). Red (blue) colors represent eastward (westward) surface flow. A 2-day episode of permanent flow reversal is marked (14-15 March). (b) HFR-derived mean surface circulation for 14-15 March 2017: permanent flow reversal. (c-d) 2-day mean sea level pressure and zonal wind at 10 m height (U-10), respectively, as provided by the ECMWF: intense and persistent easterlies were the driver of the flow reversal. Original source: from Lorente et al., 2019b.

Eliminado: .

### 2.2.2 Tsunami detection

790 Tsunami early warning and alert is an emerging and promising application of HFR. The main principle underlying the detection is that the abnormal surface current pattern induced by the orbital velocity of the tsunami wave train can be measured and interpreted in real-time by an appropriate detection algorithm. The idea was first proposed by Barrick (1979), but it was only after the 2004 Indian Ocean disaster that the proof of concept was made on the basis of actual HFR data. It was shown numerically with simulated (e.g. Lipa et al., 2006; Gurgel et al., 2011) and real (e.g. Lipa et al., 2011 & 2012; Dzvonkovskaya et al., 2012) events that the tsunami signature could be clearly seen in the HFR radial currents and some appropriate detection algorithms were proposed. One strong point of HFR tsunami detection is that it is not bound to the nature of the source (i.e.

seismic or atmospheric) and can be used as a useful complement to other warning systems in places where those are either not available or non-effective. Today, more than 20 real tsunamis have been detected ‘offline’ with the reanalysis of HFR data. In view of the growing interest for these new capabilities of HFR, some radar manufacturers now provide commercial toolboxes along with their hardware system for the early detection of tsunamis; such systems have been installed in some places at risk (e.g. Vancouver Island Canada, Oman, New Jersey USA, [Sagres in the SW Portugal](#)). To date, the only real-time detection was issued following a [meteotsunami](#) that occurred on the [1<sup>st</sup> of October 2016](#) in Tofino, BC, Canada (Dzvonkovskaya et al., 2017; Guérin et al., 2018).

However, no such HFR tsunami alert system has been yet installed in the Mediterranean Sea, [even though](#) there is a non-negligible tsunami hazard in this region, as witnessed by very destructive co-seismic events in recent history (e.g. Messina, [Sicily](#), 1908). Some worst-case scenarios with a strong (M7.8) earthquake in the North Algerian margin predict important tsunami waves with 3-4 meter amplitude on the French-Italian Riviera (BRGM, 2007). Moderate earthquakes such as the M6.9 21 May 2003 Boumerdes-Zemmouri are sufficient to cause 1-3 meter amplitude harbor oscillations within 40-60 minutes in the Balearic Islands, which would be the most impacted spot by seismic sources in North Algeria (Wang et al., 2005; Sahal et al., 2009). The impact in the French Mediterranean coast impacted by a seismic source in the North Algerian margin is shown in Fig. 9.

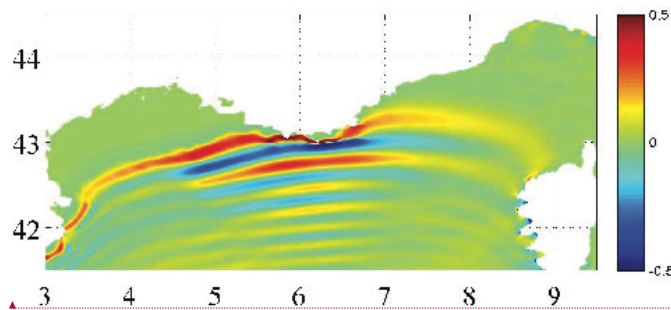

**Figure 9:** Map of the French Mediterranean coast (close to the HFR-TIn system) within the simulated surface elevation (in meter) after 1h10 propagation for a tsunami generated by a M7.8 seismic source in the North Algerian margin. The numerical simulation uses FUNWAVE-TVD software with 3 nested grids in the West Mediterranean basin (courtesy of Stephan Grilli, University of Rhode Island, USA).

In addition to co-seismic tsunamis, frequent [meteotsunamis](#) (i.e. tsunamis of meteorological origin) have been reported in the Balearic Islands, named –“rissaga”- (Jansa, 2007), Adriatic Sea –“šćiga”- (Vilibić and Šepić 2009; Orlić, 2015), Sicily Channel –“marrobbio”- (Candela et al., 1999; Zemunik et al., 2021), Malta – milghuba”- (Drago, 2008), northern Persian Gulf (Kazeminezhad et al., 2021), Black Sea (Vilibić et al., 2021) and Aegean Sea (Papadopoulos, 1993). Even though these events have limited regional impact, they can cause severe local damage in harbors and bays due particularly to the micro-tidal regime,

Eliminado: meteo-tsunami

Eliminado: . Nevertheless

Eliminado: Sicilia

Con formato: Revisar la ortografía y la gramática

Eliminado: S

Eliminado: meteo-tsunami

Eliminado: s

830 resulting in rapid sea level changes (Vilibić et al., 2021). Indeed, the strongest known meteotsunami in the Mediterranean Sea (and likely in the world) was in the Adriatic, the so-called Great Vela Luka Flood (June 1978), with an amplitude of 6 m and periods of about 20 min, as detailed by Vučetić et al. (2009), closely followed by the event from Ciutadella Harbor (Menorca island, Spain) in June 2006 (Jansa et al., 2007) with 4-5 m of amplitude. Meteotsunamis are caused by atmospheric disturbances combined with several further possible amplification mechanisms of the induced sea surface wave; these are mostly the so-called Proudman-, Greenspan-, shelf- resonances in coastal areas which can lead to strong harbor resonances in semi-closed basins (Orfila et al., 2011). Today, the generation of these meteotsunamis is better understood (Monserrat et al., 2006; Šepić et al., 2009, 2015; Vilibić and Šepić 2009; Ličer et al., 2017) but their prediction is still a very challenging task (Denamiel et al., 2019, Romero et al., 2019, Mourre et al., 2020).

Eliminado: meteo-tsunami

Eliminado: ,

Eliminado: They

835 When located in the areas affected by the meteotsunamis, HFR-based tsunami early warning systems could be a useful complement to these forecasting systems, helping issuing specific alerts on the basis of the actual observed surface currents 20-40 km offshore a few minutes before the generation of the extreme sea level oscillations. Note that tsunami early warning systems only require software update of existing HFR and could be installed at reduced cost in some places. However, some strategic spots are not covered yet and would deserve a novel installation to monitor the travel directions of incoming waves from the most probable sources (North Algerian earthquake, West Corsica submarine mass failure, North Ligurian earthquake, etc.). Another related issue is extending the range of these HFR, which would imply operating at lower frequency bands (4-5 MHz or 9 MHz) than those usually employed in the Mediterranean region (13, 16 or 25 MHz). A HFR prototype (i.e. Stradivarius radar) operating at 4.5 MHz with 200-300 km range was developed by the Diginext Ltd. a few years ago for the Gulf of Lion as a proof of concept (Grilli et al., 2015). Such HFR systems can serve the double purpose of warning and characterizing abnormal surface current patterns arising from tsunami-like waves of seismic or atmospheric origin. As recently suggested by Domsps et al. (2020), they can also be used as proxies for the observation of low-pressure fronts of atmospheric gravity waves that could lead to storm surge, if not meteotsunamis.

Eliminado: meteotsunami

Eliminado: a

Eliminado: Nevertheless, a software for tsunami detection and warning has been installed in the HFR site located in Sagres (Portugal), which operates at 13 MHz (Roarty et al., 2019). Such a

Eliminado: (i.e. Stradivarius radar) on the French Mediterranean side to monitor a large part of

Eliminado: . A proof of concept was made that such radar could provide early alerts of plausible tsunamigenic sources in the Mediterranean Sea

Eliminado: meteo-tsunami

Eliminado: (Domsps et al., 2020)

### 2.3 Environmental Transport Processes

855 In the Mediterranean, as elsewhere in the world, the coastal zones serve as the main entry point of nutrients, pollutants and sediments into the ocean, being the multi-scale coastal ocean dynamics the key drivers for their transport, also impacting their dispersal and retention and the cross-shelf exchanges. HFRs have demonstrated a capacity to provide very valuable measurements to continuously monitor the mesoscale structures and frontal dynamics that organize the coastal surface flow and associated transport, by the developments in the understanding of Lagrangian dynamics from HFR data (Rubio et al., 2020). The comprehension of the coastal ocean conditions and variability underlying ocean productivity that correlate with fish stock abundance, fish recruitment in coastal areas, dispersion and retention of larvae, etc., is critical for a sustainable management of fisheries resources (Sciascia et al., 2018). Coastal and littoral areas are also very vulnerable target regions for pollution, in terms of environmental and ecosystem impact as well as economic and societal consequences, being also essential

Eliminado: being the

Movido (inserción)[1]

Eliminado: Coastal and littoral areas are also vulnerable target regions for pollution.

Con formato: Sin Resaltar

Eliminado: ,

to assist water quality management by tracking source and drift of contaminants (e.g. chemical, sewage, oil spills or harmful algal blooms). In the Mediterranean Sea, the applicability of HFRs in the study of environmental transport processes are particularly relevant due to its limited exchange with the oceanic basins, its microtidal character and its intense internal meso and submesoscale circulation. These specific characteristics of this semi-enclosed sea reduce the potential of dilution and dispersion of dissolved and particulate wastes, maximizing the impact of one of the most commonly identified threats (i.e. marine litter and contaminants). In addition, despite being considered one of the most oligotrophic areas in the world ocean, it is also one of the world's hot spots for biodiversity (Coll et al. 2010, Gabrié C., et al. 2012), providing vital areas for the reproduction of pelagic species (e.g. Atlantic bluefin tuna, white shark and sea turtles) and hosting sensitive ecosystems in the shallow coastal waters (e.g. seagrass meadows of the endemic *Posidonia oceanica*, the key intertidal habitat of vermetid reefs built by endemic gastropod *Dendropoma petraeum*, the coralligenous assemblages, etc., as detailed by Coll et al., 2010).

### 2.3.1 Pollution and floatables tracking

Coastal regions in the Mediterranean Sea are heavily inhabited with strong tourism pressure and maritime activity resulting in human and industrial waste intentionally or accidentally dumped into coastal waters. These pollutants evolve according to their chemical transformation over time and are caught in the 3D general circulation and carried offshore and to other distant coastal areas by currents. For example, heavy metals or other chemical contaminants that may be present in semi-enclosed harbors (Tessier et al., 2011) could have important consequences on the ecosystem, and plastic litter is today a massive and particularly harmful component (e.g. Ryan et al. 2009; Declerck et al., 2019) of the marine pollution in the Mediterranean Sea. Furthermore, detecting monitoring and cleaning up oil slicks following an offshore spill before they reach the coast is a major challenge. Consequently, monitoring, understanding and forecasting coastal dynamics is a critical step to develop adequate strategies to mitigate the effects of pollution in marine environments, from or towards coastal areas. However, forecasting coastal dynamics is one of the most challenging issues in geosciences due to their strong space-time variability as well as the complexity of the processes controlling the dynamics that interact simultaneously over a broad range of time-space scales, as previously highlighted in Sect. 2.1.2. Thanks to the growing importance of HFR as a key element of coastal observing systems, coastal currents can nowadays be continuously measured in relatively large coastal areas, thus enabling the analysis of transport properties of the surface flow by means of different diagnostics based on the Lagrangian approach (i.e. addressing the effects of the spatio-temporal variability of the velocity field on drifted particles or tracers). Recent studies have demonstrated the potential of this land-based remote sensing technology for different applications in the field of tracking oil spills (Abascal et al., 2009), marine litter (Declerck et al., 2019) or phytoplankton (Hernández-Carrasco et al., 2018a). In this regard, the trajectories of passive tracers are determined by the velocities measured by HFR (e.g. Ullman et al., 2006), often including the effect of subgrid scale diffusion. When chemical pollutants are considered, additional processes should be included. For instance, when simulating oil spill trajectories, the advection term is a linear combination of the surface current

Eliminado: pollution

Eliminado: this field

Eliminado: is

Eliminado: since, in addition

Eliminado: s

Eliminado: e.g

Eliminado: Coastal areas are very sensitive to pollution impact, in terms of environmental and ecosystem impact as well as economic and societal consequences, and can be both source and target of pollution.

Eliminado: t

Movido hacia arriba[1]: Coastal and littoral areas are also vulnerable target regions for pollution.

Eliminado: Coastal and littoral areas are also vulnerable target regions for pollution. Detecting

Eliminado: Coastal and littoral areas are also vulnerable target regions for pollution.

Eliminado:

Eliminado:

Eliminado: fast

Eliminado: th

Eliminado:

Eliminado: providing a regional synoptic view of the surface dynamics with high spatial and temporal resolution. ¶ Therefore,

Eliminado: can be analyzed using continuous HFR observations

Eliminado: Transport and mixing properties can be studied from the Eulerian or the Lagrangian approach. While the Eulerian perspective describes the basic characteristics of the velocity field, the Lagrangian approach addresses the effects of this field on drifted particles or tracers. Lagrangian diagnostics have the advantage of exploiting the spatial and temporal variability of a given velocity field. They can even unveil the presence of filaments at sub-grid scales generated by the chaotic mixing, providing an improved description of transport phenomena in geophysical flows and complementing the Eulerian metrics. The Lagrangian framework indeed allows to effectively track the physical processes occurring along the history of the fluid parcels, which clearly is of utmost relevance for biogeochemical and biological dynamics (Hernández-Carrasco et al., 2018a; 2020)

Eliminado: a

Eliminado: p on the ocean surface is advected by a velocity (Hernández-Carrasco et al., 2011; Sayol et al., 2014) ... [4]



velocity, the wind velocity and the Stokes drift, and spreading, evaporation and emulsification should be included in the transport model.

Here we provide evidence to support the reliability of the HFR currents for tracking substances at coastal areas. The Lagrangian validation has been performed using data from 8 drifters' trajectories available in the domain of the HFR area of coverage in the Ibiza channel (HFR operated by SOCIB, Tintoré et al., 2020) during October 2012. We use the HFR velocity fields to compute the Lagrangian Coherent Structures (LCS) which are very suitable to provide a template of the fluid flow transport (see Haller, 2015, and references therein), allowing the detection of transport barriers, which are of great relevance for marine dynamics. For example, LCS obtained from ridges of the Finite Size Lyapunov Exponents have been correlated with filaments of remote-sensed Chl-a (Lehahn et al., 2007; Hernández-Carrasco et al., 2014, 2018a, 2020), sea bird foraging behavior (Tew Kai et al., 2009), with the modelled extension of oxygen minimum zones (Bettencourt et al., 2015) and with wind forcings (Berta et al. 2014b). At coastal scales, the dynamical picture in the Lagrangian frame has been analyzed using data from HFR currents to identify relevant small-scale transport barriers (Lekien et al., 2005; Gildor et al., 2009; Rubio et al., 2018), some of them focusing on coastal areas of the Mediterranean Sea (Haza et al., 2010; Berta et al., 2014b; Hernández-Carrasco et al., 2018a). Fig. 10 shows the evolution of a set of virtual neutrally buoyant particles initially deployed on the northern (blue dots) and southern (black dots) flank of a given LCS measured from the HFR-Ibiza in January 25<sup>th</sup>, 17:00 UTC in 2013 (Fig. 10a). Although the location and magnitude of this LCS evolve in time, the LCS persists for several hours manifesting the presence of a coherent transport barrier preventing both sets of particles to be mixed up. A meridional LCS is formed and maintained during the simulated period, limiting water exchanges between the coast and the open ocean (Fig. 10a–c).

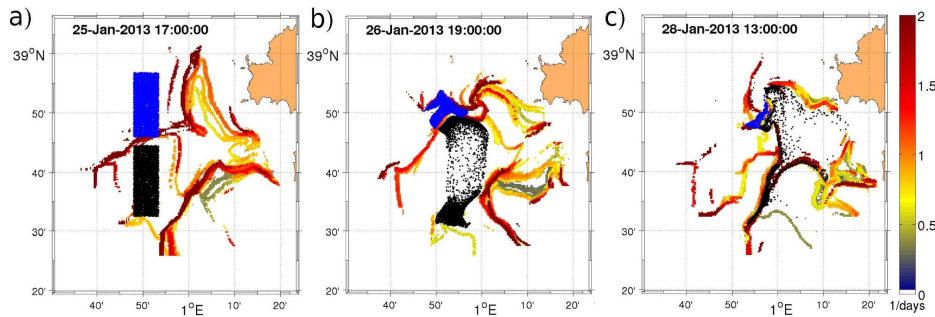

Figure 10. Evolution of two sets of particles (black and blue) in the area covered by the HFR-Ibiza in January 2013 superimposed on the backward FSLE (colorbar). The virtual particles are initially deployed at both sides of a barrier revealed by a zonal LCS on Jan 25<sup>th</sup>, 2013 at 17:00 evolving for 68 hours.

Another example of application of the Lagrangian properties derived from the HFR focuses on the monitoring of the physical mechanisms that can influence the escape times of mesotrophic and/or polluted coastal waters to the oligotrophic offshore

**Eliminado:** (from HFR or Ocean General Circulation Models -OGCM-)

**Eliminado:**

**Eliminado:** Leaving aside the diffusive component that can be parameterized by an empirically determined diffusion coefficient and a random walk model, the two dimensional position of the particle at the ocean surface Eq. (2) can be obtained by integrating the velocity Eq. (1):  
$$x_p(t + \delta t) = x_p + \int_t^{t+\delta t} u_p^{adv} dt \quad (2)$$
 Thus, by integrating the measured velocities  $u_p^{adv}(lon, lat, t)$  from the HFR, we can track (either forward or backwards in time) the evolution of floating debris at the ocean surface.

**Con formato:** Revisar la ortografía y la gramática

**Eliminado:** Moreover, we

**Eliminado:**

**Eliminado:** As seen in

**Eliminado:** , by integration of Eq. (2) for

**Eliminado:** Besides, coastal waters are enriched in nutrients from river outflows, sediment resuspension and coastal upwelling, that can also contain increased quantities of pollutants (e.g. floating marine litter). The physical mechanisms that contribute to the offshore transport of these mesotrophic coastal waters to the oligotrophic offshore areas are critically important for boosting oceanic primary production and sustaining the trophic chain. The mechanisms that can influence the escape times of these waters in a target area can be monitored by means

areas, as described in Rubio et al., (2020). Using as input gap-filled HFR velocity fields a Lagrangian Particle-Tracking Model provides the particle trajectories. From the Lagrangian model outputs, it is possible to infer the characteristic time-scales for transport processes in the HFR footprint area by means of the escape rate of active particles (Fig. 11). Thus, HFR shows to be an excellent tool to monitor conditions and identify the different scenarios that favor the local retention and dispersal of shelf waters in two study areas under the influence of ocean boundary currents.

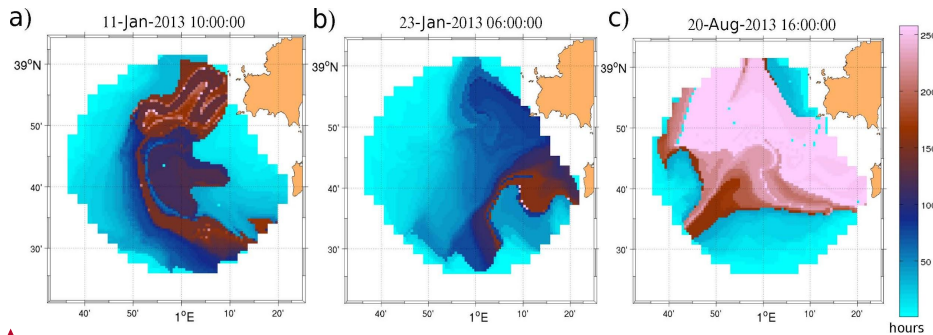

Figure 11. Maps of particle residence times (hours) computed for different dates and seasons, from HFR observations in the Ibiza Channel SOCIB (a,b for winter and c for summer conditions). Original source: from Rubio et al., 2020.

### 2.3.2 Eddy tracking

Ocean eddies are ubiquitous, pervasive flow structures which dominate the ocean velocity field at several scales, from the meso- to the local scale (Chelton et al., 2011). They play a fundamental role in sea dynamics, being responsible for the energy transfer among different scales (down to the dissipative range) as well as for their ability to transport nutrients, biomass, sediments and pollutants. Mesoscale eddies, produced by geostrophic instabilities, are not able to advance the energy transfer, being constrained by geostrophic and hydrostatic balance (Charney, 1971). When the balance is broken, the downscale may continue through inertia-gravity waves emitted from currents, ageostrophic instabilities, and bottom boundary layer turbulence, which are responsible for the formation of submesoscale eddies. At a lower scale, three-dimensional turbulence proceeds toward the dissipative range (McWilliams, 2019).

The presence of ocean eddies has become more evident in recent years, thanks to the introduction of new oceanographic measurement techniques, while their exhaustive characterization would require synoptic time series of the velocity field in the ocean (Robinson, 1983). Such synoptic observations are made available only through satellite data, however, besides being limited to relatively large scales, and preferably to the open ocean, they do not provide direct measurements of the total velocity field. Indeed, altimetry data can be used to retrieve the surface geostrophic field, which lacks a possibly important portion of the dynamics (Rinaldi et al., 2010; Conti et al., 2016). Other ways to observe eddies from satellites consist in the observation of their presence in the sea surface temperature or in the tracer field patterns, as displayed by ocean color (Robinson, 2010).

Eliminado: by means of the residence times and the escape rate/times (Rubio et al., 2020)

Eliminado: (Eq. 2)

Con formato: Revisar la ortografía y la gramática

Coastal HFRs overcome all the above limitations, enabling the detection and the tracking of the time history of surface eddies down to submesoscale, at the cost of a reduced spatial extent.

Mandal et al. (2019) provide quite an extensive list of recent literature reporting submesoscale features observed by HFRs, with examples of observations in various coastal areas, from the Atlantic to the Pacific and Indian oceans (Shay et al., 1995, 2000; Kirincich, 2016b; Archer et al., 2017; Lai et al., 2017; Arunraj et al. 2018). It is worth noticing that such features may have a strong vertical signature that HFR data fail to account for, and therefore need to be complemented with further information, spanning from direct measurements of the horizontal and vertical velocity profile to indications indirectly derived from, e.g., satellite turbidity measurements (see discussion in Uttieri et al., 2011).

A vast HFR network now covers the North-Western Mediterranean coastal areas (see Lorente et al., 2021b), which is characterized by significant mesoscale variability and eddy generation that, in some cases, shows recursive and seasonal patterns. Allou et al. (2010) used HFR to observe and characterize vortex structures, mostly anticyclonic, in the Gulf of Lion. They also argued they were correlated with specific wind patterns. Schaeffer et al. (2011) improved the analysis and employed both HFR measurements and numerical modeling to analyze the eddy generating mechanism. They found it is primarily influenced by wind forcing and its interaction with topographic constraint (northerly offshore wind), and freshwater input from Rhone river (southerly onshore wind). The combination of HFR and *in-situ* observations, and modelling tools, allowed Guihou et al. (2013) to identify an anticyclonic coastal eddy which was generated in front of Nice by a meander of the Northern Current, and advected downstream toward the Toulon area, interacting with the mean circulation. More recently, the analysis of the long 2012-2019 HFR time-series in Toulon allowed to identify cyclonic and anticyclonic recurrent eddies mainly generated by wind and boundary current undulations (Bourg and Molcard, 2021).

The development of monitoring networks providing long time series of data, is making automatic eddy detection methods more and more topical and important. Generally speaking, existing eddy detection algorithms can be divided into three families: (i) those that are based on the geometrical features of the velocity field, typically in terms of streamline closeness, winding angle or vector geometry (Sadarjoen et al. 1998; Heiberg et al. 2003; Ebling and Scheuermann 2003; Nencioli et al. 2010); (ii) those based on dynamical characteristics, such as parameters quantifying the eddy intensity, its vorticity, etc. (Jeong and Hussain 1995; Fang and Morrow 2003; Isern-Fontanet et al. 2003; Morrow et al. 2004); (iii) and hybrid methods, based on the combination of geometric and dynamical criteria (Mkhini et al. 2014; Conti et al., 2016, see also the extensive review in the paper by Le Vu et al., 2018).

Algorithms specifically devised for HFR data are very few. The methods tested in the Mediterranean Sea (Caldeira et al., 2012) are limited to those by Nencioli et al. (2010), and by Bagagli et al. (2020). The former, even though developed for HFR data (and for high resolution numerical model outputs), has found a widespread range of applications to observations collected by different platforms, as witnessed by current oceanographic literature (Liu et al., 2012; Dong et al., 2014). It is a method based on the geometry of the velocity vectors. It was conceived for geostrophic or quasi-geostrophic recirculating features, showing very little divergence. For this reason, it is very suitable to describe mesoscale eddies, but may fail in detecting submesoscale ones, which often are characterized by divergence or convergence and by a high degree of deformation of the velocity field

**Eliminado:** and provide direct measurements of the total surface velocity field at high spatial and temporal resolution, thus

**Eliminado:** o

**Eliminado:** follow

**Eliminado:** submitted to this Special Issue

1100 geometry. The YADA (Yet Another eddy Detection Algorithm) algorithm developed by Bagaglini et al. (2020) was conceived specifically to overcome this limitation and be utilized to automatically detect submesoscale eddies, which may exhibit highly non-geostrophic characteristics. It is a hybrid method, which focuses on both the dynamical and geometric features of the velocity field, first identifying the local extrema of a dynamical field characterizing recirculation (e.g., the local normalized angular momentum, see Mkhinini et al., 2014; or the Okubo-Weiss parameter, Okubo, 1970; Weiss, 1991), similarly to the first step from AMEDA (Angular Momentum Eddy Detection and tracking Algorithm) defined by Le Vu et al. (2017), and thereafter analyzing the streamline geometry in a neighborhood of the extremum. The YADA (Bagaglini et al., 2020) has been successfully applied to 1 km-resolution HFR data from the Gulf of Naples, showing its ability to identify strongly asymmetric, convergent or divergent submesoscale eddies. Its application to coastal HFR data from other areas of the Western Mediterranean is presently under way.

1110 The HFR system from LaMMA Consortium (described in Lorente et al., 2021b) covers part of the Ligurian Sea and the Tuscan Archipelago, which is a shallow area separating the Ligurian and Tyrrhenian basins, bordering eastward the Corsica Channel, with complex topography and coastal morphology, also due to the presence of several islands (Elba, Capraia, Montecristo, Gorgona). Sea dynamics are strongly influenced by seasonality and characterized by the presence of the Tyrrhenian boundary current and its bifurcation, the Eastern Corsica Current (Astraldi and Gasparini, 1992; Millot, 1999; Vignudelli et al., 2000). Through drifters, *in-situ* data, and a numerical model, Poulain et al. (2020) studied the area in the summer season. They found prevailing southward current flowing next to the Italian coast, then turning westward and northward encountering Elba island. A further eastward motion led to the formation of anticyclone centered on Capraia island, which exhibited variations correlated to wind forcing. The presence of an anticyclone north of Corsica Channel, in summer and autumn seasons was previously documented by Ciuffardi et al. (2016) by means of *in-situ* profiles and altimetric data. Furthermore, they argued that the characteristics of the anticyclone (position and size) may affect the general circulation, by isolating the Tyrrhenian and Ligurian basin, mostly in summer. These hydrodynamics features can influence the concentration of floating marine litter, which was shown to be particularly high in certain periods of the year (Fossi et al 2017).

1120 Here, we show the application of both the YADA and Nencioli et al. (2010) algorithms to the surface currents derived from the HFR- LaMMA system, during the year 2019.

1125 Figure 12 reports four eddies detected by the YADA algorithm, and the corresponding surface currents in August 2019.

Eliminado: submitted to this Special Issue

Eliminado: of the LaMMA consortium

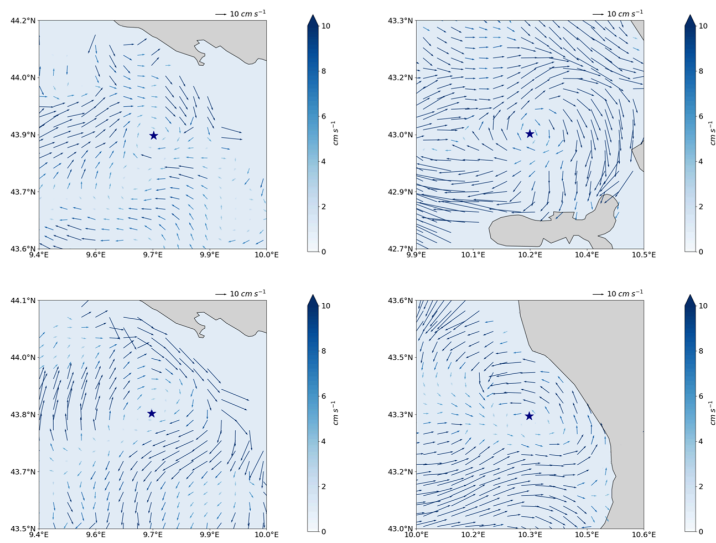

Con formato: Revisar la ortografía y la gramática

Figure 12. Maps of the area of eastern Ligurian Sea and Tuscany Archipelago showing the HFR derived surface currents (colored arrows indicating the current speed) and the detection of four eddies in early August 2019 by the YADA algorithm. The blue star marks the eddy center.

Fig. 13 shows the results of the application of the algorithm by Nencioli et al. (2010) to the whole year 2019, which provided a seasonal census of anticyclonic and cyclonic eddies in the area sampled by the HFR- LaMMA system. The HFR coverage was not uniform during the year with generally lower percentages for the warmer seasons (i.e. spring, summer). The area north of Elba island was characterized by the highest eddy activity throughout the year, with a predominance of anticyclonic eddies in colder seasons, and a clustered pattern in summer, showing anticyclonic eddies east of Capraia island and cyclonic ones toward the coast.

Eliminado: Furthermore,

Eliminado: LaMMA

The number of detected eddies depended also on the availability of HFR data; indeed, a smaller number of eddies was found in spring (28) with respect to the other months (62 winter, 68 summer, 62 autumn). Median eddy life-span was around 1.125 days for all seasons except in spring, although some were able to survive up to 6 days.

Eliminado: even if they

Eliminado: , except in spring

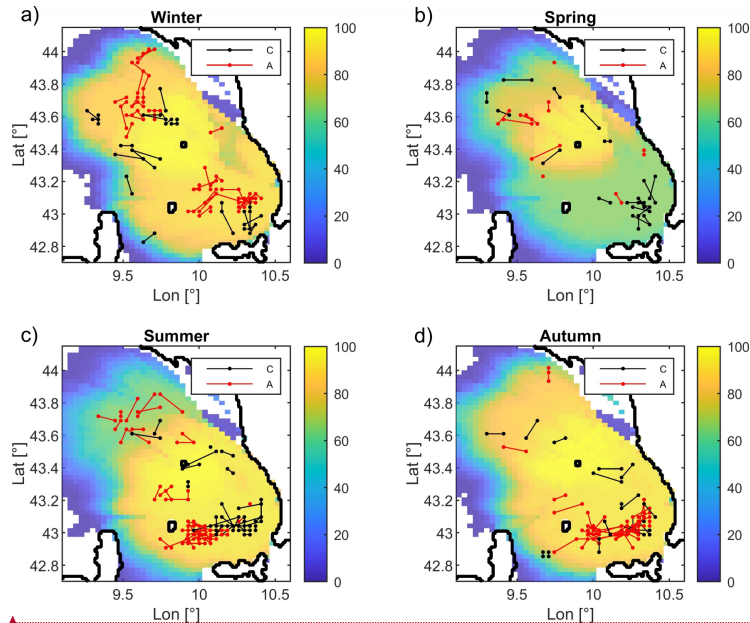

Con formato: Revisar la ortografía y la gramática

Figure 13. Maps of the area covered by the LaMMA HFR network showing the percentage of HFR data availability along 2019 for a) winter; b) spring; c) summer and d) autumn. The Tuscan Archipelago (i.e. Elba island) is at the lower-right corner of the figures. Tracked cyclonic (black) and anticyclonic (red) eddies detected in each season are overlaid.

Although the present work is preliminary, it may lay the basis for a detailed analysis concerning the seasonal features of eddy activity within the Tuscan Archipelago, and its effect on the general circulation. Surface currents from HFR can be combined with the numerical model outputs both to bridge the gap relative to the spatial and temporal coverage of data, and to improve the representation and forecast of the real sea state. HFR observations enhance numerical simulations by resolving fine-scale processes in intricate regions with complex-geometry configurations. In turn, hydrodynamic models can reciprocally serve as integrative connectors of sparse *in-situ* observations and gappy HFR surface current maps by offering a seamless predictive picture of the three-dimensional ocean state.

Eliminado: reliability with respect to the actual sea dynamics

Eliminado: .

Con formato: Fuente: Cursiva

Con formato: Sin Resaltar

### 2.3.3 Transport of biological quantities and connectivity

The necessity to preserve the marine ecosystem equilibrium and the water quality, has fostered the use of HFR data in supporting the coastal zone management and assessing the variability in the dynamics of marine ecosystems. In particular,

HFR data have been used worldwide to address ecological and water quality issues such as: (i) to understand the transport and retention processes of plankton or wastewater discharge in some regions of NW Spain (Ria de Vigo) (Piedracoba et al., 2016) and Western Mediterranean (Hernández-Carrasco et al, 2018a), at coastal upwelling fronts off central California (Bjorksted and Roughgarden, 1997) and in Monterey Bay (Coulliette et al., 2007); (ii) to investigate the enhancement of productivity due to the retain of phytoplankton within the flow in the Santa Barbara Channel (Brzezinski and Washburn, 2011) and (iii) to analyze the relationship between populations of larval and juvenile fishes and the mesoscale flow field in the California Current System (Nishimoto and Washburn, 2002).

Here we present examples of application of HFR data to investigate ecological questions in three Mediterranean coastal areas: the Gulf of Naples (GoN, Tyrrhenian Sea), the Gulf of Manfredonia (GoM, western Adriatic Sea) and the Malta-Sicily Channel (mid Mediterranean Sea).

In the GoN, the continuous observations of the HFR current fields highlighted several characteristics of the surface circulation and water exchange between the interior of the gulf and the neighboring open Tyrrhenian Sea (Cianelli et al., 2013). An oscillating plankton population dynamic has been also frequently observed in the GoN, at Long-Term Ecological Research station MareChiara (LTER-MC), where plankton abundance is monitored weekly since 1984. A proof of concept study (Cianelli et al., 2017), was thus conducted in order to characterize the spatial scales and the provenance of phytoplankton assemblages detected at LTER-MC and to dissect processes regulating plankton dynamics.

The study focused on a year-long analysis carried out for 2009, which was characterized by a very accurate estimate of the surface dynamics, with a reduced number of gaps among ecological measurements and HFR data. The approach followed these conceptual steps: (i) Reconstruction of the annual and seasonal regimes of HFR currents detected at the LTER-MC site;

(ii) Computation of Lagrangian backtracking simulations advecting virtual phytoplankton patches (VPPs) in the HFR field (Fig. 14, a). VPPs were released at LTER-MC site on the dates of the weekly oceanographic campaigns and tracked backward, allowing thus the estimation of the positions of the VPPs up to 4 days (i.e. 96 h) prior to its arrival at LTER-MC; (iii) Identification of the prevailing directions from which the VPPs arrive at LTER-MC site, as resulting from backtracking simulations (Fig. 14, b), also allowing the definition of the spatial distribution of the VPPs origin zones (not shown) in the GoN; (iv) Comparison among backtrack Lagrangian reconstruction and ecological analysis based on salinity and Chl a data obtained through weekly sampling at LTER-MC (Fig. 14, c); (v) Identification of different modes of coupled physical and ecological functioning in the GoN as resulting from physical transport and biological processes ('allogenic' and 'autogenic' factors, respectively).

Eliminado: T

Eliminado: in the GoN,

Eliminado: GoN

Eliminado: at the

Eliminado: Running

Eliminado: . V

Eliminado: in time (up to 96 h earlier) to their zone of origin (Fig. 14, a)

Eliminado: , and showing a higher percentage of occurrences of VPPs coming from the coastal area

Eliminado: (iii) Identifying

Eliminado: scales

Eliminado: horizontal transport of virtual phytoplankton patches

Eliminado: (Fig. 14, b)

Eliminado: c

Eliminado: orophyll

Eliminado:

Eliminado: Identifying

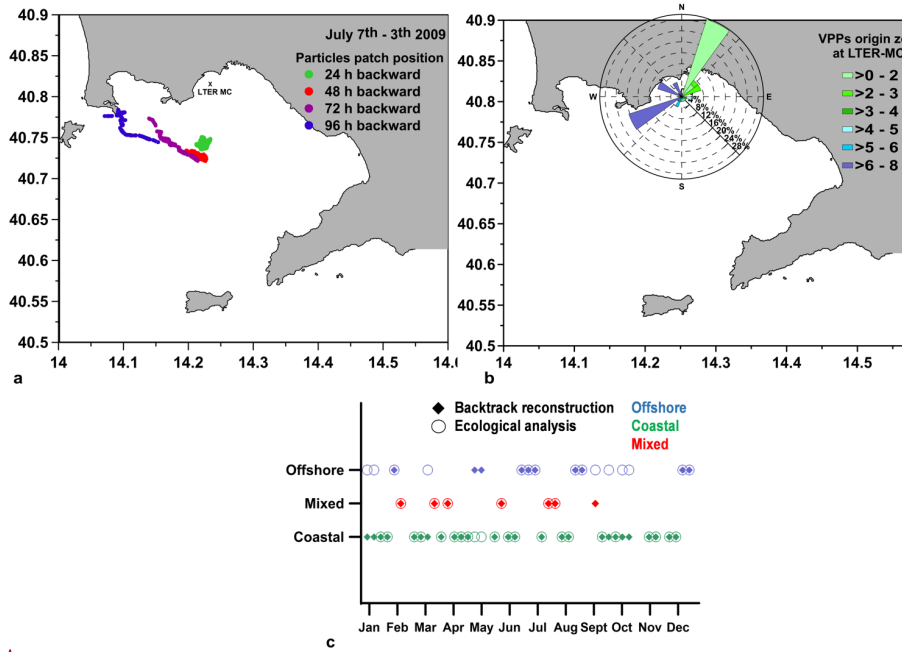

210 Figure 14. a) Map of the Gulf of Naples (southern Tyrrhenian Sea) showing the: a) Lagrangian backtracking trajectories of  
 Virtual Phytoplankton Patches (VPPs) in the period 7th - 31th June 2009 and b) main origin sectors of the VPPs at LTER-MC  
 site resulting from backward simulations, index sectors of VPPs are 1-2-3-4-5 for coastal areas and 6-7-8 for offshore areas;  
 215 c) comparison among backtracking Lagrangian origin and ecological analysis based on salinity and Chl-a data weekly measured  
 at LTER-MC. Green = VPPs originating from coastal areas; blue= VPPs originating from offshore areas; red = VPPs  
 originating partly from coastal and partly from offshore areas. Adapted from: Cianelli et al., 2017.

The results showed an alternation in plankton dynamics between phases reflecting the influence of coastal (green) and offshore (blue) circulation patterns on the biological community. The phytoplankton community detected at LTER-MC generally originated from the coast, whereas the offshore inflow marginally changed the main traits of phytoplankton assemblages. Backtracking simulations and biological data strictly agree, highlighting that the plankton community at LTER-MC during 220 2009 is affected by the alternation of coastal and offshore influence.

Biological autogenic factors drive the modifications of coastal phytoplankton communities during the coastal 'green' phases, thus suggesting that the GoN tends to retain the same communities via coast-ward circulation, especially during summer. Physical allogenic factors are important in driving dilution and species advection of coastal phytoplankton, during the offshore

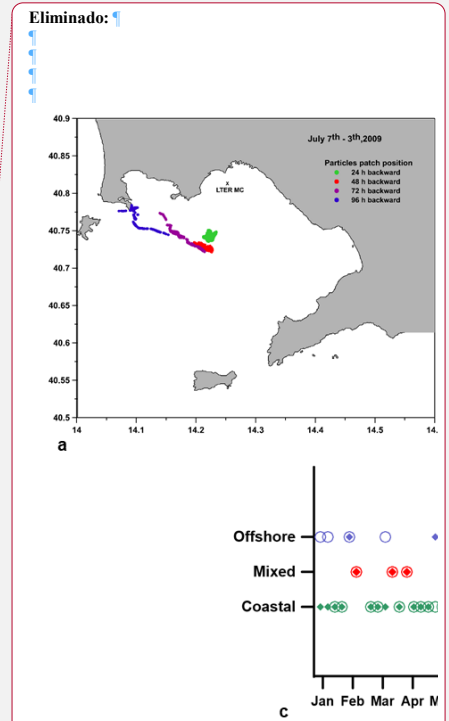

Eliminado: 1

Con formato: Revisar la ortografía y la gramática

Con formato: Revisar la ortografía y la gramática

Eliminado: :

Eliminado: 9

Eliminado: 20

Eliminado: as

Eliminado: chlorophyll

Eliminado: -

Eliminado: determinant



'blue' phase. This marked alternation between coastal and offshore water masses acts to promote phytoplankton diversity, because the dilution in the phytoplankton density may decrease the impact of the dominating species over the available resources.

1240 The integration of long-term biological data and high-resolution current fields represents an optimal tool to investigate the role of surface circulation in structuring the marine plankton community, thus confirming the value of HFR systems to analyze the seasonal fluctuations in marine ecosystems dynamics and to unveil the mechanisms of coastal connectivity.

The GoM is a well-known recruitment area in the Adriatic Sea (Sciascia et al., 2018; Corgnati et al., 2019a). In this region, HFRs have been used to understand the role of ocean currents in the recruitment of small pelagic fishes (i.e. European sardines,

1245 *Sardina pilchardus*). Fig. 15 shows residence times within the GoM, estimated using trajectories of virtual drifters computed from the surface currents measured by HFRs. Months with high (October)/low (February) residence times are associated with weaker/stronger surface currents in the central area of the Gulf. The relatively short (<12-day) average residence times have shown that local spawning is less likely to take place than the transport to the Gulf from remote spawning areas through advection pathways. Results agree with otolith measures, suggesting that the arrival of larvae within the Gulf is characterized

1250 by repeated pulses from remote spawning areas that are likely to play a fundamental role in maintaining the nursery.

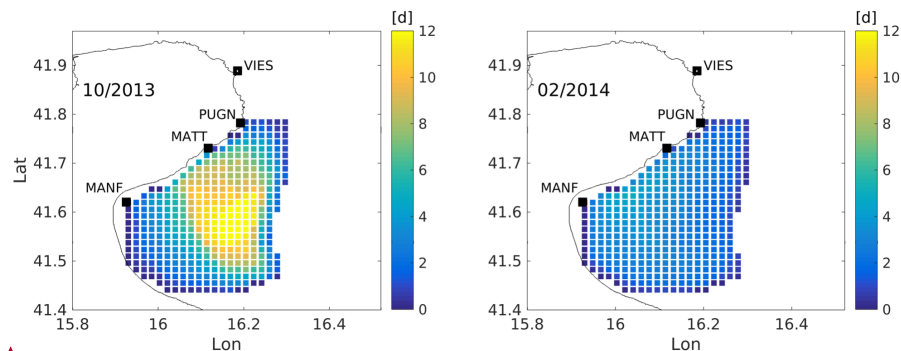

1255 **Figure 15. Maps of the Gulf of Manfredonia showing monthly bootstrap estimates of average residence times (in days) of virtual particles advected in the HFR velocity field and released within the Gulf of Manfredonia for the months of October 2013 (left panel) and February 2014 (right panel). Black squares represent the locations of the four HFR antennas along the Manfredonia gulf. Adapted from: Sciascia et al., 2018.**

The Malta-Sicily Channel is both the most fished area in western Mediterranean Sea and a very important hotspot of biodiversity (Médail & Quézel, 1999). In this region, Capodici et al., (2018) combined the HFR-CALYPSO surface currents together with satellite images of Chl-a and SST, to explain physical driving mechanisms that can help interpret ocean

1260 monitoring water quality data provides valuable insight into the understanding of processes driving spatial and temporal

Con formato: Revisar la ortografía y la gramática

Eliminado: chlorophyll-a concentration -CHL-

Eliminado: Sea Surface Temperature -

Eliminado: -

Eliminado: en

265 changes in productivity at sea (Behrenfeld et al., 2006). Chl-a and SST are generally accepted as proxies for water quality and  
are very helpful to detect upwelling events, which are frequently occurring along the Sicilian coast. In particular, sea currents  
are responsible for dispersion, transport or retention of nutrients of which Chl-a is widely used as a proxy variable; moreover,  
current jets or eddies are often observable as cold or warm areas in the SST maps, respectively. Even if both Chl-a and SST  
maps are usually retrieved by means of satellite data maps, cloudiness often reduces the satellite data availability; thus,  
270 temporal aggregated products (e.g. at 8 or 16 days) are the only data available. In this framework, the integration of sea surface  
current data provided by HFRs can fill the gap of knowledge due to the inadequate temporal (and sometimes spatial) resolution  
of these water quality maps. Capodici et al., (2018) used the Principal Component Analysis -PCA- (Preisendorfer, 1988) to  
firstly extract the dominant spatial patterns of these variables in 2013 (Fig. 16, left panels) and to secondly quantify the degree  
of correlation between SST (or Chl-a) and HFR derived surface current spatio-temporal patterns (see Fig. 16, bottom-right  
275 panel). The spatial correlation analysis suggests the importance of current advection in the phytoplankton transport, being  
characterized by fringes where very high positive correlation areas are surrounded by very high negative ones and viceversa.  
Moreover, the spatial distributions of time-averaged radar currents and corresponding TKE (Total Kinetic Energy), EKE (Eddy  
Kinetic Energy) and the absolute value of the products between temporal fluctuations of the deviations from the time-averaged  
zonal and meridional velocity components (ReS), shown swirling areas for the first time at high spatio-temporal resolution.  
280 The trapping zones, characterized by low values of TKE (see Fig. 16, top-right panel), EKE and ReS at their cores, may help  
explain why this channel is particularly rich in pelagic species, highlighting how the continuous high resolution HFR derived  
surface currents can improve the decision-making in fisheries resource management.

Eliminado: CHL

Eliminado: CHL

Eliminado: CHL

Eliminado: along

Eliminado: CHL

Eliminado:

Eliminado: process

Eliminado: spatial

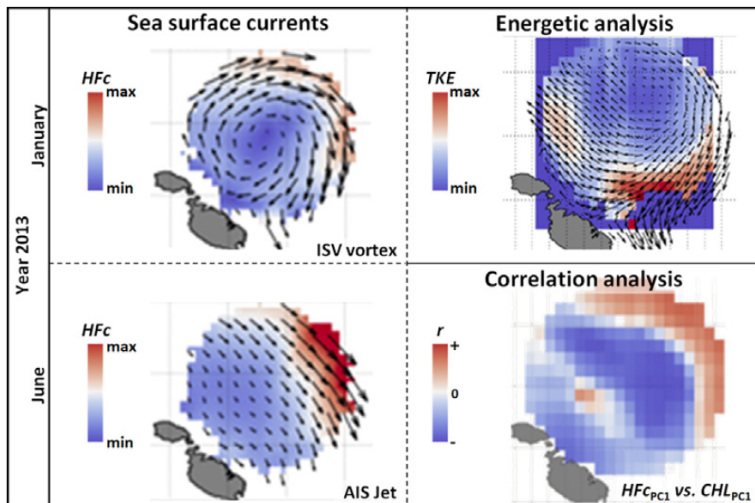

Con formato: Revisar la ortografía y la gramática

295 Figure 16. Map of the Malta-Sicily Channel showing the monthly averaged HFR sea surface currents for January and June 2013 (top left and bottom left panels, respectively), spatial distribution of the Total Kinetic Energy (top right panel) and of the correlation coefficient between the first PC of both HFR and CHL- $\alpha$  (bottom right panel). Original from: Capodici et al., (2018), graphical abstract.

Eliminado: CHL

### 3 Discussion and preliminary assessment of the HFR regional capabilities

300 This initial review of scientific and societal applications using HFR data, implemented in the Mediterranean coastal areas, have allowed us to know their potential and limitations to continue contributing to the regional observing system in addressing the regional existing environmental threats, the scientific key priorities and the societal needs. Considering also the current threats and the opportunities ahead along the UN Ocean Decade (2021-2030), we have conducted a SWOT (i.e. strengths, weaknesses, opportunities, and threats) analysis, as schematized in Fig. 17.

305 One of the main weaknesses found is the limited adoption of common data and metadata models for HFR surface currents. As a result of international and European efforts made in recent years towards the HFR data harmonization and distribution, detailed in Lorente et al., (2021b), it has already been defined: (i) the common data and metadata model for HFR surface currents (Corgnati et al., 2018, 2019b; Mantovani et al., 2020); (ii) the tools for near real-time (Corgnati et al., 2020) and for historical data processing (Corgnati et al., 2019c); (iii) the guidelines (Reyes et al., 2019) and (iv) the training activities. Despite of that, only 23% of the near real-time and 15% of the historical data from the Mediterranean HFR sites are integrated to the

Eliminado: inventory

Eliminado:

Eliminado: HFR

Eliminado: strengths and weaknesses

Eliminado: further

Eliminado: e

Eliminado: y

Eliminado: this

Eliminado: d

Eliminado: the

Eliminado: , and as discussed in this section for each one of the three challenges: i) maritime safety; ii) extreme hazards and iii) environmental transport process

European HFR node (Lorente et al., 2021b), established in November 2018 as a focal point for data management and distribution.

In the sphere of maritime safety, the main strength of HFRs is the provision of high spatio-temporal resolution surface currents over wide coastal areas, where most of the SAR incidents occur (see Sect. 2.1.1). HFRs are used as alternatives of the models for backtracking drifting objects in near-coastal risk-prone environments and for complementing other scarce *in-situ* observations, also helping to assess and to improve the ocean models, through data assimilation (see Sect. 2.1.2). In this regard, the provision of HFR data uncertainties (Moore et al., 2019) might boost the use of HFR data for data assimilation and model

assessment. In addition to that, the machine learning approach where a neural network model is trained on past data and then used to create short term predictions (see Sect. 2.1.3) is gaining ground in recent years. The steadily growing of the European HFR network (Rubio et al., 2017; Roarty et al., 2019), increasing both the coastal coverage in many countries and the length of the time series, will allow us to implement these self-learning algorithms in other Mediterranean areas. Nevertheless, there is a strong need for consensus on the methodology to generate these scientific added-value products, and on the definition and further adoption of a common data and metadata model as well as the quality control tests. This lack of consensus hinders the operational distribution of standardized HFR gap-filled data and derived STPs, which may lock the HFR data potential for their use in several Lagrangian applications.

Additional efforts for unlocking interoperable HFR (basic or added-value) data access will greatly contribute to deliver greater uptake, use and value from the HFR data. Once we are able to turn HFR data into customized information, the further challenge is to extend the science-based added-value products and applications into societal relevant downstream services (Tintoré et al., 2019). To face this challenge, a clear stakeholder engagement strategy is needed to identify, categorize and analyze the user needs and requirements. By strengthened links with the identified stakeholders, the HFR community will reinforce the user's loyalty, whereas by involving them along the life cycle of the application development, it will ensure the achievement of their needs, raising their interest and usage. Furthermore, emerging HFR applications will enable new communities and sectors to discover and use the HFR data.

As a land-based remote sensing technology, HFRs are able to continuously monitor the coastal ocean response to extreme events without the need to be deployed at sea under severe meteocean conditions, thus avoiding the risk to be faced by other observing platforms (i.e. research vessels, ferry boxes or even autonomous instruments). Moreover, HFRs are also unaffected by cloud coverage, which is usually associated with extreme storms and that prevent the ocean color satellites and infrared radiometers to infer and further observe the Chl-a concentration and the SST, which are generally being used as proxies of surface circulation. In addition, it is worth highlighting that under severe weather phenomena, near-real time met-ocean information gains value since it is essential to avoid risky situations and to support the emergency response at sea. The resilience of HFRs under unfavorable weather conditions, has allowed us to monitor and deeply investigate the impacts of intense wind episodes, severe river freshwater discharges and record-breaking storms as well as to observe the weakening or even the reversal of main surface currents and jet streams (Sect. 2.2.1). Furthermore, being demonstrated that tsunami signature, irrespective of its origin (i.e. seismic or atmospheric), could be clearly seen in the HFR radial currents, it opens up

Eliminado: in

Eliminado: HFRs

Con formato: Fuente: Cursiva

Eliminado: ,

Eliminado: or being used as alternatives of the models for backtracking drifting objects in near-coastal risk-prone environments.

Eliminado: , to

Eliminado: ly

Eliminado: e

Eliminado: helping to un

Eliminado: Moreover, the use of the HFR data for data assimilation and model assessment should be boosted through the provision of data uncertainties (Moore et al., 2019).

Eliminado: surface's

Eliminado: , by providing near real-time information of the surface's ocean response on a continuing basis. In this context, HFR strength is based on its no deployment requirement,

Eliminado: ,

Eliminado: being

Eliminado: and making also easier their routine maintenance tasks under these severe episodes

Eliminado: Furthermore

Eliminado: to be

Eliminado: ed

Eliminado: This capability

Eliminado: their

385 the possibility of using them as a useful complement to other warning systems in places where those are either not available  
or non-effective (Sect. 2.2.2). Nevertheless, despite the existing risk from tsunamis and the frequent occurrence of  
meteotsunamis in particular coastal areas of the Mediterranean Sea, there has not been installed any HFR tsunami alert system  
in this region. Facing a growing interest in these HFR new capabilities, several threats must be previously addressed: (i) the  
installation of new systems to monitor the most probable source areas and (ii) the extension of the range by using lower  
operational frequencies in the Mediterranean Sea to be able to detect the tsunami-induced currents far offshore, to offer early  
390 warning.

The recognized capabilities of the continuous HFR observations to analyze the transport properties of the surface flow and to  
detect and track surface eddies down to submesoscale (Sect. 2.3.2), have allowed us: (i) to understand the phytoplankton  
distribution and to identify different local retention scenarios (Sect. 2.3.1) as well as (ii) to investigate the role played by the  
characteristic mesoscale variability and eddy generation in the transport of biomass, pollutants and in the recruitment and  
395 abundance of small pelagic species in the Mediterranean coastal waters (Sect. 2.3.3). These practical applications have fostered  
the use of HFR data in supporting the coastal zone management (CZM) and assessing the variability in the dynamics of marine  
ecosystems, becoming a valuable asset for contributing in the achievement of the Good Environmental Status (GES) of the  
Mediterranean waters. However, it has been found that the number of detected eddies depend on the HFR data availability,  
highlighting the need to combine the HFR data with numerical model outputs aiming to bridge the spatio-temporal gap of the  
400 observed data and to improve the reliability of the simulations. It should also be noted that the HFR limited coverage reduces  
the potential of the larger scale applications and connectivity studies, thus requiring their integration with other *in-situ* and  
satellite observations as well as models, which in turn will benefit from the future expansion of the HFR network.

Considering the key features (see Sect. 1) of HFRs as their main competitive strengths when compared versus other observing  
platforms, it must be recognized that the provision of information at the very near surface layer constitutes its most serious  
405 limitation, as highlighted in the SWOT analysis from Lorente et al., (2021b). In order to fully understand ocean dynamics, the  
knowledge of the 3D processes in the entire water column is essential as well. A significant number of coastal ocean  
observatories in the Mediterranean Sea (as described by Tintoré et al., 2019) encompass a complex multi-platform network  
including HFRs, aiming to meet the primary but challenging need to monitor both the surface and the water column. This has  
motivated the development of techniques able to combine the information of the processes in the entire water column, in order  
410 to provide a three-dimensional picture of the overall dynamics. The combination of such observations is challenging mainly  
for two reasons: surface and ocean interior are prone to different processes and forcings with different spatio-temporal scales  
and at, the same time, the capabilities to resolve and characterize the diverse processes may be different for observing platforms  
at the sea surface and in the water column. Despite the promising results obtained by Berta et al. (2018) and Guihou et al.  
(2013) in the Mediterranean Sea, necessary efforts must continue towards the further development of methodologies to  
415 combine HFR data with water column measurements and models.

Eliminado: improved capacities to detect tsunami-induced currents make it a valuable complement to other warning systems in the Mediterranean.

Eliminado: and

Eliminado: risk

Eliminado: meteo-tsunami

Eliminado: no

Eliminado: has still been installed

Eliminado: challenges

Eliminado: regarding

Eliminado: as usual

Eliminado: ,

Eliminado: ,

Eliminado: and

Eliminado: In this regard, it has

Eliminado: n

Eliminado: of great value to

Eliminado: e

Eliminado: ed

Eliminado: also

Eliminado: both

Eliminado: being these applications also

Eliminado: ed

Eliminado: high spatio-temporal resolution

Eliminado: derived surface currents being one of its

Eliminado: is that it provides information at the very near surface layer

Eliminado: water column

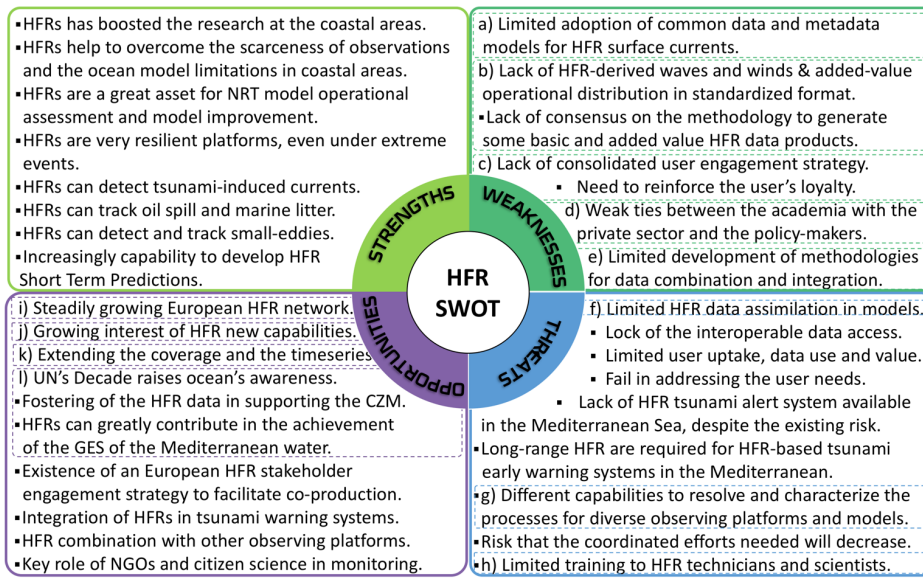

445 **Figure 17. SWOT analysis of the HFR capabilities and applications. Dashed-line boxes around the text highlight those weaknesses, threats and opportunities that have been addressed in the recommendations.**

#### 4. Future prospects for HFR applications and recommendations

450 After the description of the current implementation status of the HFR applications in the Mediterranean coastal areas, and based on the results obtained from the previous SWOT analysis, we present here the prospects for the future and a set of key recommendations. Future prospects for HFR applications will benefit from the progressive implementation of the defined recommendations: (i) to ensure that the potential of the HFR data is fully exploited in the development of operational monitoring systems at the regional level; (ii) to help to derive the added-value achieved by the European HFR network (Rubio et al., 2017; Rubio et al., 2021; Corgnati et al. 2021; Lorente et al. 2021b), such as the data management centralization and the standard data distribution, the development of new products and cross-disciplinary emerging applications, the provision of training workshops, etc.; (iii) to include the recommendations in the long-term monitoring strategy. This last point is crucial for: (i) the development and the integration of the different COOSs into a robust regional ocean observatory; (ii) ensuring that

Con formato: Revisar la ortografía y la gramática

Eliminado: ¶ ... [5]

Con formato: Revisar la ortografía y la gramática

Con formato: Sin Resaltar

Eliminado: Finally,

Eliminado: a

Eliminado: These

Eliminado: aim

Eliminado: , helping also

Eliminado: (i.e.

Eliminado: of the data management

Eliminado: development,

Eliminado:

Eliminado: schools

Eliminado: ).

Eliminado: T

Eliminado: se

Eliminado: should be part of

Eliminado: for

Eliminado: structuring the ocean observation at the regional level, for

such integration is fully aligned with the European and the global roadmap; and (iii) addressing key science priorities and societal challenges of the Mediterranean coastal regions.

Although the future prospects at the regional level are shared far beyond the geographical borders of the Mediterranean Sea, recommendations have a stronger regional focus: (i) to coordinate cross-national efforts (i.e. implementation of technical, financial and management approaches at national and regional level, establishment of cross-border agreements for obtaining dedicated frequency allocation for HFR technology); (ii) to account for regional specificities (e.g. north-south unbalance in the monitoring capabilities, prominent use of medium and short range HFR frequencies, existence of ship noise and radio frequency interferences due to high marine traffic density, high restrictions for obtaining the required HFR installation licenses in coastal tourism areas, etc.) and to respond to regional needs (in terms of scientific key priorities, societal needs and existing environmental threats) and (iii) to map the existing and potential HFR data regional end-users, also facilitating the interaction with them. On the basis of the future prospects, 12 recommendations can be highlighted in the same alphabetical order as the weaknesses (items a-e) and threats (items f-h) which are intended to be covered, as well as the opportunities (items i-l) to be seized by each one of them (as in the schema of the Fig. 17).

**a) Keep promoting the HFR data interoperability and distribution at the regional level:** In order to reduce the bottlenecks that hinder the HFR data harmonization and their provision as open data, a data policy or data sharing agreement between the parties providing and receiving data should be defined and put in place. It might also partly resolve the difficulties for sharing the HFR data held by companies or controlled by arrangements with the private sector, who partially or fully funded the installations. The collaboration with international initiatives will ensure convergence and interoperability. The HFR data harmonization and sharing will ultimately contribute to provide the research community with continuous and more valuable coastal data and to underpin the development of the HFR applications.

**b) Reinforcing the Mediterranean's leadership for defining the standard models of HFR basic and added-value products.** The Mediterranean institutions are key players in the European and international HFR research effort in multidisciplinary fields and in the development of applications, as mostly covered in the Sect. 2 of this work. In addition to that, HFR experts from the Mediterranean institutions are actively contributing to the definition of the European HFR network roadmap detailed in Rubio et al., (2021), leading crucial tasks. One of these tasks aims to define the standard model and to increase the availability and accuracy of the HFR wave parameters, which are weaknesses included in Lorente et al., (2021b). Another important task focuses on seeking consensus on the methodology for the provision of the HFR added-value data products (i.e. gap-filling data). The creation of partnerships between different research groups and institutions in the context of European, regional and national projects (Lorente et al., 2021b) is contributing to move forward both the expansion of the HFR network and the main research areas, also fostering the HFR data interoperability and distribution, helping to unlock the HFR data potential, discovery and usage.

**c) Enhancing data discoverability, access and usability:** The EuroGOOS HFR Task Team has already taken the first steps towards the definition of the user engagement strategy (Rubio et al., 2021), building a database of current and potential stakeholders, with the input of some Mediterranean institutions. However, a stronger involvement is needed to avoid

Eliminado: towards

Eliminado: tific questions

Eliminado: meeting the

Eliminado: related to

Eliminado: , being always aligned with the European strategies to ensure the integration

Eliminado: for the HFR data use and applications

Eliminado: the regionalization of the recommendations constitutes a benefit

Eliminado: (

Eliminado: )

Eliminado: ii

Eliminado: Therefore, we specifically address them in this section, as follow:

Eliminado: continuing to be a major European focus of HFR activity

Movido (inserción)[2]

Eliminado: a clear stakeholder engagement strategy will allow us to identify, categorize and analyze their needs, thus reinforcing the links and the loyalty with current users and enabling new communities and sectors to discover and use the HFR data.

Eliminado: this

535 imbalances between countries and greater efforts are required to move it forward by means of programs that promote networking and coordination. Tight interactions with stakeholders on a fit-for-purpose basis and the enhancement of the societal impact of the HFR data are major elements of the strategy, especially, towards ensuring long-term sustainability. Boosting the regional involvement in this strategy will result in the spreading of end-user applications at the regional/local level, stimulating also the development of new ones in response to the users' feedback.

540 **d) Strengthening public-private-partnerships:** (i) at the regional level, by enhancing inter-institutional collaboration, to exchange expertise, to build consortia and for sharing job opportunities in this field. In this sense, the Mediterranean HFR network is being benefited from both, the activities carried out in the context of EuroGOOS HFR Task Team, summarized in Rubio et al., (2021), and from the ongoing regional joint projects and the existing national HFR coordination structures, as listed in Lorente et al. (2021b). It is also highly recommended the participation in annual fora led by stakeholders, like the 1<sup>st</sup> MED-FORUM that brought together the Heads of maritime services or Coast Guards of almost all Mediterranean States, aiming to develop a regional policy in the field of maritime safety and to improve the efficiency of SAR services in the

545 Mediterranean area (Trevisanut et al., 2010); (ii) at the European level, by being aligned with ongoing initiatives and projects, contributing to the EuroGOOS HFR Task Team and the main marine data portals (e.g. Copernicus Marine Service, EMODnet, SeaDataNet), that will avoid duplication of efforts; (iii) at the Global level, by collaborating with the international institutions that are world leaders in HFR and ocean observation as well as with the Global HFR network, to ensure the consistency in the data standards and best practices; (iv) with the private sector, by transferring the knowledge and the applications from the

550 academia to the operational oceanography industry to turn them into commercial services, improving the links between research and new technologies. The development of the existing and potential applications will also assist the HFR manufacturers in marketing their technologies.

555 **e) Fostering the HFR data integration** with other *in-situ* and satellite data: Exploiting the nature of their measurements, HFRs are currently being used for filling the gaps of other sparse or lower spatio-temporal resolution observations in coastal areas, as well as for improving and assessing satellite observations. In this context, it should be considered the opportunity that the launch of the wide-swath Surface Water & Ocean Topography (SWOT) altimeter expected for November of 2022 will offer. SWOT altimeter should be complemented with other remote and *in-situ* sensors to fully resolve the typical Mediterranean mesoscale structures of 10-100 km (Gómez-Navarro et al., 2018). Additional complementarities might be fostered with the monitoring of surface current worldwide using the information from the Automatic Identification System -AIS- data streams

560 (Benaïchouche et al., 2021), where HFR measurements can be used as a consistent ground-truth dataset for validation purposes and for increasing the spatial resolution of the AIS-reconstructed fields at coastal areas. The integration of HFR measurements with other multi-platform observations from gliders or ADCPs (Manso-Narvarte et al., 2020) have already been implemented and tested, particularly under the umbrella of the JERICO-NEXT project (Griffa et al., 2019). This multi-platform combination underpins sound understanding of the three-dimensional coastal circulation, allowing the broadening of the HFR applications

565 (i.e. below the surface). Data fusion and integration will contribute to increasing the societal and scientific value of all observations, not only the HFR ones.



570 **f) Boosting the HFR data assimilation** for model improvement: As shown in the Sect. 2.1.2 of the present work, HFR surface current data assimilation have demonstrated to improve the model performance in many studies (Paduan and Shulman, 2004; Barth et al., 2008; Hernández-Lasheras et al., 2021). Furthermore, the HFR standard data distribution in near real-time throughout the main European marine data portals, facilitating the data access and ensuring the timeliness, make them an ideal dataset for efficient data assimilation in operational modelling (Capet et al., 2020). However, WMOP is the only regional model from the Mediterranean, which is systematically assimilating HFR data in its operational chain (Hernández-Lasheras et al., 2021). As highlighted by Capet et al., (2020), the lack of expertise, training and capacity building is limiting the uptake of assimilation practices.

575 **g) Expansion of the pool of expertise** by including not only HFR technology, but data management and applications, satellite remote sensing, ocean modelling, data assimilation, training aspects, and exchanging and sharing knowledge, tools, data, know-how between diverse research groups at the European, regional and global levels.

580 **h) Training of the new generations of HFR technicians and scientists** are needed to ensure the knowledge exchange, the sufficient expertise to allow for a significant expansion of the coverage and the sustainability of the operations and the HFR applications. This is currently being done in the context of periodic workshops and summer schools (such as the recent ISSOR and SICOMAR plus summer schools, etc.) within the academia context. Moreover, the development of best practices for demonstrations are not only key to reach satisfactory quality standards but also for fostering the learning process. However, additional technical training courses provided by the manufacturers at the HFR operator level are recommended. Furthermore, the participation of Mediterranean institutions and companies in the creation of an international, intersectoral and interdisciplinary qualified supporting training network will contribute to boost knowledge and know-how exchanges, involving all actors (e.g. academia, operators, manufacturers, private sector, etc.).

585 In addition to all above-mentioned recommendations, the seeking for funding is a compulsory task aiming to support, together with the stakeholder's engagement and the training of the new generations, the long-term sustainability of the HFR network, their data and applications at national, regional and European levels. To this end, EuroGOOS HFR Task Team has taken early steps to prepare a competence matrix that will facilitate the building of effective, interdisciplinary, intersectoral and well-balanced consortia, grounded in shared research interests and goals, aiming to prepare competitive bids and applications for funding, taking advantage of the expertise of the team in diverse grant calls (Rubio et al., 2021). In addition to the research/grant funding, long-term infrastructure funding at national, regional and European government level with financial input from other operational users through regional consortia will be needed towards a truly sustainable infrastructure. For further details about the diverse socioeconomic and technical challenges to be tackled during the implementation of a sustained and integrated HFR regional network, the reader is referred to the Sect. 5.1 of the companion publication from Lorente et al., (2021b).

590 The Mediterranean HFR network must also take advantage of the opportunities the arise in the framework of the UN Decade of Ocean Science for Sustainable Development and the European Green Deal to lead the way towards the future prospects. Four recommendations are given to benefit from the opportunities, as included in the SWOT analysis (Fig. 17, bottom-left panel) are as follows:

Movido (inserción)[3]

Eliminado: +

Eliminado: etc

Eliminado: etc

Eliminado: ¶

Con formato: Fuente: Sin Negrita

Eliminado: ¶

**i) Expansion of the Mediterranean HFR network:** although **this** network is already representing the 55% of the HFR sites existing in the European inventory (Lorente et al., 2021b), and despite the very recent installations (i.e. in **Port of Licata**, **Portofino and Celle Ligure** -Italy-, in **Port of Menton and Mimizan** -France- and in **Ta' Cenc in Gozo** -Malta), and several new deployments in an initial planning stage (i.e. in Haifa Bay -Israel-, Sardinia and Sicily islands, Gulf of Genoa and Gulf of Naples, Tuscany Archipelago -Italy-, Gulf of Trieste -Slovenia- and in the Aegean -Greece-), the Mediterranean coastal areas are still under-sampled. In this regard, it should be noted that the spatio-temporal scales currently provided by the HFRs in the Mediterranean allow us to monitor the current environmental threats adequately, but always in limited coastal areas, thus reducing the potential of the larger scale applications (e.g. transport of organic matter and pollutants, connectivity studies, data assimilation into models, etc.). Therefore, aiming to improve **the strategy of the ocean observatories to respond to regional needs for a** better understanding of region-specific processes towards a fit-for-purpose design, an increased monitoring effort by expanding and improving the HFR network is required, allowing for a covering of a large geographical area on a routine basis. Accordingly, **a review of major scientific and social questions** is needed **including** the environmental stressors and their impacts in the Mediterranean waters and blue **economy** sectors, identifying the benefit of the new deployments, in coordination with the current monitoring actions (e.g. to identify gaps for monitoring these risks, ensuring cost-effectiveness of observations, etc.). To this end, the cross-border coordination activities are key for the involvement of other countries bordering the Mediterranean Sea in the eastern and southern coastlines and to address issues related to frequency sharing for avoiding interferences, as highlighted in Lorente et al., (2021b).

**j) Further development of emerging HFR applications in the Mediterranean.** The extension of the HFR surface current to fit for multiple purposes, aiming to address from single to multiple environmental threats, scientific questions and societal needs, requires a multidisciplinary integrative approach and coordinated monitoring of different essential **ocean** variables. In this context, it **is worth mentioning** that **the HFRs multi-parameter monitoring of the sea state allows the development of diverse applications to tackle a wide range of coastal threats:** (i) to monitor eutrophication in high-productive coastal waters, combining HFR surface currents with thermistor chains, oxygen and turbidity sensors at various depth increments, and to address physical-biological interactions in coastal basins (Cianelli et al., 2017; Hernández-Carrasco et al., 2018a); (ii) to monitor the transport of floating marine litter and other contaminants using surface current fields from HFRs and models (Declerck et al., 2019); (iii) for ship-tracking (Dzvonkovskaya et al., 2007; Laws et al., 2016); (iv) for early tsunami **meteotsunami** detection (Lipa et al. 2006; Monserrat et al., 2006; Guérin et al., 2008 ; Lipa et al. 2011 & 2012; Gurgel et al. 2011, Dzvonkovskaya et al. 2012); (v) for freshwater monitoring (Meadows et al., 2013); (vi) for extracting new information from the HFR signals aiming to advance the understanding of key processes at the coastal areas, such as stratification (Shrira and Forget, 2015), air-sea interaction (Berta et al., 2018) and mixing in the upper ocean, near-surface current shear, etc.; (vii) for promoting the HFR use for supporting marine renewable energy resource assessment (i.e. winds, currents, waves) in the coastal zone (Wyatt, 2012, 2021; Basáñez and Pérez-Nuñuzuri, 2021; Mundaca-Moraga et al., 2021), etc. Additionally, since the intensity of the multiple stressors (e.g. climate change effects, habitat loss and degradation, eutrophication, introduction of alien species, fishing practices) is increasing throughout most of the Mediterranean basin, **trend**

Eliminado: the MONGOOS-HFR

Eliminado: submitted to this Special Issue

Eliminado: and

Eliminado: de

Eliminado: the

Eliminado: etc

Eliminado: regionalization

Eliminado: for

Eliminado: , it

Eliminado: a previous review of major scientific and social questions,

Eliminado: etc

Eliminado: submitted to this Special Issue

**Reinforcing the Mediterranean's leadership** for continuing to be a major European focus of HFR activity. The Mediterranean institutions are key players in the European and international HFR research effort in multidisciplinary fields and in the development of applications, as mostly covered in the Sect. 2 of this work. In addition to that, HFR experts from the Mediterranean institutions are currently and actively contributing in the definition of the European HFR network roadmap, leading crucial tasks aiming to define the standard model, increase the availability and accuracy of the HFR wave parameters and to reach a consensus on the methodology for the provision of the HFR data gap-filling products (Rubio et al., 2021). The creation of partnerships between different research groups and institutions in the context of European, regional and national projects (Lorente et al., submitted to this Special Issue) is contributing to move forward both the expansion of the HFR network and the main research areas, also fostering the HFR data interoperability [6]

**Movido hacia arriba[2]: Enhancing data discoverability,**

Eliminado: observing

Eliminado: should be noted

Eliminado: applications are diverse being able to focus on [7]

Eliminado: - and different compartment, widening their uses [8]

Con formato: Sin Resaltar

Eliminado: meteo-tsunami

Eliminado:

Eliminado: i

Eliminado: , etc

Eliminado: temporal

755 analysis is an essential process in assessing the state of the ocean of a region. This will contribute to effectively informing current and future marine policies and management actions as well as to underpin longer-term scientific objectives.

760 **k) Extension of the Mediterranean HFR time series** that would enable the widespread implementation of novel data science methodologies. It is expected that the HFR measurements will be expanded in the next decade, both in space (i.e. new HFR systems) and time (i.e. longer time series). This will increase the availability of multi-year surface current datasets, thus contributing to boost the application of the HFR derived STPs that uses self-learning algorithms to other Mediterranean locations. For such sites, the stability of SOM-solutions in time may be tested as well, or the self-learning and training of SOM solutions might change in time to properly reflect long-term changes in oceanographic conditions in a coastal area. The further development of short-term predictive systems based upon HFR surface current fields and their adaptation to the Mediterranean HFR network by incorporating non-tidal component of current will enhance the STPs' integration into operational maritime safety applications, where it has been demonstrated their capacity to reduce the searching area (Roarty et al., 2010).

770 **l) Regional contribution to long-term major effort** towards building a sustained and fit-for-purpose European Ocean Observing System capable to support the UN Decade of Ocean Science for Sustainable Development and the European Green Deal should be two-fold: (i) On the one hand, the Mediterranean HFR network outcomes should be scientifically grounded to further ensure the extension of the science-based added-value products into societal relevant downstream services (Tintoré et al., 2019) and, (ii) on the other hand, the Mediterranean HFR community's long-standing cooperation must be further strengthened towards a co-designed and sustained regional network, contributing to and, simultaneously, benefited by the European HFR Task Team (Corgnati et al., 2021, Rubio et al., 2021) endorsement, roadmap and main achievements (as recommended by Lorente et al., 2021b).

## 5 Summary and conclusions

775 The socio-economically vital and environmentally stressed coastal areas of the Mediterranean Sea are some of the most exposed regions in the world due to the impact of climate change, being also highly vulnerable target regions for maritime safety, oil and marine litter pollution, fish stocks overexploitation and met-ocean hazards. The high spatio-temporal variability of the coastal dynamics requires the monitoring of these (sub)mesoscale processes at the right scale. HFRs are nowadays the only technology for continuously monitoring surface currents (increasingly waves and winds) at unprecedented high spatio-temporal resolution over coastal areas and with relatively low cost-effort, when compared with other traditional ocean observing platforms. Their integration in ocean observing has boosted the progress in the research of small-scale features and their interaction with larger scales, also underpinning the further development of applications. In this work, we present a review of the existing mature and emerging scientific and societal applications using HFR data, developed to address the major challenges identified in the Mediterranean coastal waters, organized around three main topics: (i) maritime safety; (ii) extreme hazards and (iii) environmental transport processes. In addition to previous studies carried out at global and at the European scale on this topic, this work also provides a list of strengths, weaknesses, opportunities and threats of the existing HFR

Eliminado: e

Eliminado: are progressively needed

Eliminado: effective

Eliminado: , also contributing

Eliminado: : by guaranteeing the long-term sustainability

Eliminado: , i

Eliminado: ing

Eliminado: ,

Eliminado: for the benefit of

Eliminado: , allowing also to test

Eliminado: <#>Fostering the HFR data integration with other *in-situ* and satellite data: Exploiting the nature of their measurements, HFRs are currently being used for filling the gaps of other sparse or lower spatio-temporal resolution observations in coastal areas, as well as for improving and assessing satellite observations. In this context, it should be considered the opportunity that will offer the launch of the wide-swath Surface Water & Ocean Topography (SWOT) altimeter in 2022, which should be complemented with other remote and *in-situ* sensors to fully resolve the typical Mediterranean mesoscale structures of 10-100 km (Gómez-Navarro et al., 2018). Additional complementarities might be fostered with the monitoring of surface current worldwide using the information from the Automatic Identification System -AIS- data streams (Benaïchouche et al., 2021), where HFR measurements can be used as a consistent ground-truth dataset for validation purposes and for increasing the spatial resolution of the AIS-reconstructed fields at coastal areas. The integration of HFR measurements with other multi-platform observations (e.g. ADCP as in Manso-Narvarte et al., 2020, glider data) have already been implemented and tested, particularly under the umbrella of the Jerico-Next project (see Griffa et al., 2019), for a better understanding of the three-dimensional coastal circulation, allowing the broadening of the HFR applications (i.e. below the surface).

Movido hacia arriba[3]: <#>Training of the new generations of HFR technicians and scientists are needed

Eliminado: <#>Strengthening partnerships: (i) at the regional level, by enhancing inter-institutional collaboration

Eliminado: <#>

Eliminado: <#>submitted to this Special Issue

Eliminado: and heavily human

Eliminado: ones

Eliminado: remotely

Eliminado: in the

Eliminado: advanced

applications in the Mediterranean Sea. Finally, we discuss the prospects for the future of the HFR applications and we provide a set of recommendations aiming to maximize the contribution in extending the science-based HFR products into societal relevant downstream services (Tintoré et al., 2019) to support the blue growth in the Mediterranean coastal areas, helping to meet the UN's Decade of Ocean Science for Sustainable Development and EU's Green Deal goals.

950 Considering the steadily growing integration of HFRs in the COOSs of the Mediterranean Sea and once their capabilities as an active and expanding field of investigation has been demonstrated by a wide range of practical applications, we can conclude that this consolidated land-based remote sensing technology plays a key role in the development of fit-for-purpose services for marine and maritime end-users. However, still major efforts should be done for unlocking the HFR interoperable data access and potential as well as for the further development of HFR scientific and societal applications at the regional level, thus, 955 delivering greater uptake, use and value. Fortunately, the opportunities provided in the framework of the UN Decade of Ocean Science for Sustainable Development and the European Green Deal can help to ensure the full exploitation of this HFR potential that will contribute to further deepen our understanding of coastal ocean dynamics and support the sustainable blue growth in the Mediterranean Sea. In this sense, the collaboration at regional level is crucial to address region-specific processes towards a fit-for-purpose and coordinated design of the monitoring actions, to identify the environmental threats and their 960 impacts in the environment and in the blue sectors, to easily identify the existing stakeholders, also fostering the interaction with them and to engage the potential users. This will help improve the long-term sustainability together with the training activities to the next generations and the seeking for funding. Certainly, this regional approach to strengthen collaborations should always be aligned with the global and European strategies to ensure the integration, benefiting from the European HFR roadmap and the availability of near real-time and long-term HFR interoperable data that will boost the research and to 965 underpin the further development of the HFR scientific and societal applications in the Mediterranean coastal areas.

This manuscript constitutes the second part of a double contribution. Both parts support each other in an integrative way and should be interpreted as a single entity. The first part from Lorente et al., (2021b) provides a comprehensive overview on the current status, achievements, challenges, coordinated efforts and the roadmap to transform individual HFR systems into a fully 970 integrated HFR network in the Mediterranean. Additionally, this work shows how these joint efforts have benefited and boosted the HFR data integration into services and the development of a broad range of multidisciplinary science-based and fit-for-purpose applications, contributing to leverage the HFR data to its fullest potential.

#### Author Contributions

ER and PL conceived the idea of this manuscript and fostered the collaboration as MONGOOS HFR Task Team co-chairs, being in charge of overall direction and planning. All authors contributed to the writing of the different sections of the 975 manuscript, as follows:

Eliminado: the

Eliminado: of the existing HFR applications

Eliminado: it

Eliminado: be

Eliminado: d

Eliminado: HFR

Eliminado: and its increasingly integration in the operational ocean monitoring systems is

Eliminado: ing

Eliminado: production and use of services for continuous advances in the scientific understanding of coastal ocean dynamics, technological development and in support of the sustainable blue growth in the Mediterranean Sea.

Con formato: Sin Resaltar

Eliminado: regionalization

Eliminado:

Eliminado: at regional level

Eliminado: ,

Eliminado: which complements the

Eliminado: of the

Eliminado: ,

Eliminado: provided in the first part (Lorente et al., submitted to this Special Issue).

Eliminado: ¶

Eliminado: -

!000 ER took the lead in writing the abstract, and Sect. 1, 3, 4 and 5, contributing also to Sect. 2.1. Other authors contributed in the edition of Sect. 1 (CAG, DD, MB, SS) and Sect. 4 (YT, MB, RG). MB also contributed to the summary of HFR capabilities in Sect. 3 and Sect. 5.  
CRS, VC, ML, HM, AD, AG, AM, AR and ER (designed the Fig. 1) collected the information from the Maritime Safety and Rescue Agencies for their respective countries.

!005 CRS and ML (designed the Fig. 3) contributed to the introduction of the Sect. 2.1 and, together with VC, AR (designed the Fig. 2), JT and ER they shaped the Sect. 2.1.1.  
PL (designed the Fig. 4), BM, JHL (designed the Fig. 5), EA, and ER wrote the Sect. 2.1.2.  
IHC, AO, HM (designed Fig. 6), IV, VD took the lead in writing the Sect. 2.1.3.  
MB (designed Fig. 7), AG, LC, CM contributed to the data analysis and text drafting in Sect. 2.2.1, in particular for the case study in the Ligurian Sea. In this section, PL (designed Fig. 8) and ER addressed two cases studies in the Delta Ebro and one in the Strait of Gibraltar.

!010 CAG took the lead in writing the Sect. 2.2.2, where BM, ML and MJF also contributed.  
AM, ACE, IHC (designed Fig.10 and Fig.11), AO contributed to the writing of the Sect. 2.3.1.  
MBen - Consorzio LaMMA - (designed the Fig. 12 and Fig. 13), CB, ST, BD, MU, MF, PF, EZ, HM, IV wrote the Sect. 2.3.2.

!015 MM, DC (designed the Fig. 14), RS (designed the Fig. 15), FC (designed the Fig. 16), CG, MB, AG, IHC, AO contributed to the Sect. 2.3.3. Particularly, RS and MM focused in the Gulf of Manfredonia; DC in the Gulf of Naples and FC in the Malta-Sicily case studies.  
AM, IV, CAG, JT and the MONGOOS co-chairs, VC and AO provided critical feedback and helped shape the final version of the manuscript during the internal review process.

!020 All authors have read and agreed to the submission of the manuscript for publication.

### **Acknowledgements**

This work has been possible thanks to MONGOOS (Mediterranean Operational Network for the Global Ocean Observing System) collaborative network, aimed toward long-term synergies between multi-disciplinary working groups in the Mediterranean Sea in order to launch strategic initiatives and pursue funding for innovative research projects.

!025 This work was supported by the EuroSea (EU Horizon 2020 research and innovation programme, grant agreement ID 862626). We also thank the partial support of the project CMEMS-INSTAC phase II, which provides the context of the activities for HFR data harmonization, standardization and distribution, and to the IBISAR CMEMS User-Uptake project (67-UU-DO-CMEMS-DEM4\_LOT7). Eva Aguiar and Baptiste Mourre are also very grateful for the MEDCLIC project (LCF/PR/PR14/11090002) supported by La Caixa Foundation, contributing to the development of the WMOP model.

!030 The methodology for the extreme events monitoring in the Ligurian Sea (Sect. 2.2.1) has been developed under the framework of the CARTHE III project (Prime Award n. SA 18-14, subcontract agreement SPC-000649) and the CALYPSO Departmental

Research Initiative (Grant number N00014-18-1-2782). The HFR network in the Ligurian Sea has been supported by the IMPACT project (EU funded, PC Interreg VA IFM 2014-2020, Prot. ISMAR n. 0002269). Investigation of Mediterranean Sea dynamics and applications of HFR observations are also supported by the JERICO-S3 project (EU Horizon 2020 research and  
!035 innovation programme, grant agreement no. 871153). The assimilation of HFR data in WMOP (Sect. 2.1.2) and the biological connectivity application in the Gulf of Manfredonia (Sect. 2.3.3) have been developed under the JERICO-NEXT project (EU Horizon 2020, grant agreement no. 654410). In the latter case, the COCONET project (EU FP7, grant agreement no. 287844) and the Italian national projects SSD-PESCA and RITMARE should also be acknowledged. Recent upgrades in the radar installations of the MIO in Toulon were supported by the SICOMAR-PLUS EU Interreg Marittimo project.

!040 Pier Falco and Enrico Zambianchi acknowledge partial funding from the Italian Ministry for University and Research through the “Exploring the fate of Mediterranean microplastics: from distribution pathways to biological effects” (EMME) PRIN Project.

We are furthermore grateful for the valuable information about the Maritime Rescue activity for 2019 provided by the Spanish Maritime Search and Rescue Agency, the Italian Coast Guard, the French CROSSMED, the Ministry of Maritime Affairs,  
!045 Transport and Infrastructure from Croatia, and the Search and Rescue Coordination Centers from the SRR (Search and Rescue Regions) of Slovenia and Malta. We also acknowledge the Spanish Meteorological Agency AEMET for providing HARMONIE atmospheric fields. The authors would like to thank Stephan Grilli, from the University of Rhode Island (USA) for the design of Fig. 9 (from Sect. 2.2.2) and to Leonardo Bagagli for processing the data shown in Fig.12 (from Sect. 2.3.2). Finally, authors would like to express their gratitude to the internal reviewers, Anne Molcard, Ivica Vilibić, Charles-Antoine  
!050 Guèrin and Joaquin Tintoré and to the MONGOOS co-chairs, Vanessa Cardin and Alejandro Orfila, for their careful and meticulous reading of the manuscript. Their detailed and comprehensive reviews have been very helpful to improve the structure, the reading and to finalize the manuscript.

#### **Code availability**

Corgnati, L. (2019, December 10). LorenzoCorgnati/HFR\_Node\_\_Historical\_Data\_Processing:  
!055 EU\_HFR\_NODE\_Historical\_Data\_Processing (Version v2.1.1.6). Zenodo. <http://doi.org/10.5281/zenodo.3569519>  
Corgnati, L. (2020, May 26). LorenzoCorgnati/HFR\_Node\_tools: EU\_HFR\_NODE\_Tools (Version v2.1.2). Zenodo. <http://doi.org/10.5281/zenodo.3855461>

#### **Data availability**

IMO data, mentioned in Sect. 1, is available in the Flow Monitoring Displacement Tracking Matrix website:  
!060 <https://migration.iom.int/europe?type=arrivals>

Eurostat statistics for Maritime transport of goods, mentioned in the Introduction, are available in: [https://ec.europa.eu/eurostat/statistics-explained/index.php?title=Maritime transport of goods - quarterly data&oldid=485429#EU\\_ports\\_activity](https://ec.europa.eu/eurostat/statistics-explained/index.php?title=Maritime_transport_of_goods_-_quarterly_data&oldid=485429#EU_ports_activity)

The "Sub-regional Mediterranean Sea Indicators" tool, mentioned in the Sect. 1, is available in the website:

!065 <https://apps.socib.es/subregmed-indicators/>

The SAR incidences in France, included in Sect. 2.1.1, were obtained from the website of the French Ministry of the Sea:

<https://www.mer.gouv.fr/surveillance-et-sauvetage-en-mer>

SOCIB HFR-Ibiza data, used in Sect. 2.1.1 (Fig. 2), Sect. 2.1.2 (Fig.5), Sect. 2.3.1. (Fig. 10 and Fig. 11), are available in the <https://doi.org/10.25704/17gs-2b59>.

!070 SOCIB drifter's data, used in Sect. 2.1.1., are available in <https://doi.org/10.25704/mhbg-q265> for 2014 (they have also been used in Sect. 2.1.2, Fig. 5), <https://doi.org/10.25704/bb7m-zv61> for 2016 and <https://doi.org/10.25704/84ze-sf42> for 2018.

SOCIB's WMOP simulations are available upon request to [info@socib.es](mailto:info@socib.es)

Standardized HFR data is available in the Thredds Server from the European HFR Node for some of the HFR systems mentioned in this research ([http://150.145.136.27:8080/thredds/HF\\_RADAR/HFRadar\\_CMEMS\\_INSTAC\\_catalog.html](http://150.145.136.27:8080/thredds/HF_RADAR/HFRadar_CMEMS_INSTAC_catalog.html))

!075 MIO's HFR-Toulon data is available <http://hfradar.univ-tln.fr/HFRADAR/squel.php?content=accueil> and real-time total currents (hourly data) in standard format are available for 2020 and 2021 in [https://erddap.osupytheas.fr/erddap/files/cmems\\_nc\\_cf0e\\_c84a\\_8ead/](https://erddap.osupytheas.fr/erddap/files/cmems_nc_cf0e_c84a_8ead/)

HFR-LaMMA data, used in Sect. 2.3.2, can be viewed in <http://www.lamma.rete.toscana.it/meteo/osservazioni-e-dati/radar-hf>.

!080 HFR data for the Northern Adriatic, used in Sect. 2.1.3 (Fig. 6), can be viewed in [http://jadran.izor.hr/hazardr/geoserver\\_en2.html](http://jadran.izor.hr/hazardr/geoserver_en2.html)

HFR-NAdr data, used in Sect. 2.1.1. (Fig. 3), can be viewed in <http://www.nib.si/mbp/en/oceanographic-data-and-measurements/other-oceanographic-data/hf-radar-2>

### Competing interests

!085 Authors MF, RG and PL are currently employed at Qualitas Instruments Lda, at HELZEL Messtechnik GmbH and at NOLOGIN Consulting SL, respectively. However, authors have not advertised commercial products and the research has not been sponsored by any one of the companies.

AO and VC are guest members of the editorial board of the Special Issue from the Journal. The peer-review process was guided and overseen by another member of the editorial board.

!090 The remaining authors declare that there are no relevant financial or non-financial competing interests to report.

## References

- Abascal, A. J., Castanedo, S., Medina, R., Losada, I. J. and Álvarez-Fanjul, E.: Application of HF radar currents to oil spill modelling, *Mar. Pollut. Bull.*, 58(2), 238–248, doi:<https://doi.org/10.1016/j.marpolbul.2008.09.020>, 2009.
- Abascal, A. J., Castanedo, S., Fernández, V. and Medina, R.: Backtracking drifting objects using surface currents from high-frequency (HF) radar technology, *Ocean Dyn.*, 62(7), 1073–1089, doi:[10.1007/s10236-012-0546-4](https://doi.org/10.1007/s10236-012-0546-4), 2012.
- Abascal, A. J., Sánchez, J., Chiri, H., Ferrer, M. I., Cárdenas, M., Gallego, A., Castanedo, S., Medina, R., Alonso-Martirena, A., Berx, B., Turrell, W. R. and Hughes, S. L.: Operational oil spill trajectory modelling using HF radar currents: A northwest European continental shelf case study, *Mar. Pollut. Bull.*, 119(1), 336–350, doi:[10.1016/j.marpolbul.2017.04.010](https://doi.org/10.1016/j.marpolbul.2017.04.010), 2017.
- Aguiar, E., Moure, B., Juza, M., Reyes, E., Hernández-Lasheras, J., Cutolo, E., Mason, E. and Tintoré, J.: Multi-platform model assessment in the Western Mediterranean Sea: impact of downscaling on the surface circulation and mesoscale activity, *Ocean Dyn.*, 70(2), doi:[10.1007/s10236-019-01317-8](https://doi.org/10.1007/s10236-019-01317-8), 2020.
- Allou, A., Forget, P. and Devenon, J.-L.: Submesoscale vortex structures at the entrance of the Gulf of Lions in the Northwestern Mediterranean Sea, *Cont. Shelf Res.*, 30, 724–732, doi:[10.1016/j.csr.2010.01.006](https://doi.org/10.1016/j.csr.2010.01.006), 2010.
- Álvarez-Fanjul, E., Gómez, B. P. and Arevalo, I. R. S.: Nivmar: a storm surge forecasting system for Spanish waters, *Sci. Mar.*, 65, 145–154, 2001.
- Alvera-Azcárate, A., Barth, A., Rixen, M., and Beckers, J.-M.: Reconstruction of incomplete oceanographic data sets using Empirical Orthogonal Functions. Application to the Adriatic Sea, *Ocean Modelling*, 9, 325–346, 2005
- Amores, A., Marcos, M., Carrió, D. S. and Gómez-Pujol, L.: Coastal impacts of Storm Gloria (January 2020) over the north-western Mediterranean, *Nat. Hazards Earth Syst. Sci.*, 20(7), 1955–1968, doi:[10.5194/nhess-20-1955-2020](https://doi.org/10.5194/nhess-20-1955-2020), 2020.
- Archer, M. R., Roughan, M., Keating, S. R. and Schaeffer, A.: On the Variability of the East Australian Current: Jet Structure, Meandering, and Influence on Shelf Circulation, *J. Geophys. Res. Ocean.*, 122(11), 8464–8481, doi:<https://doi.org/10.1002/2017JC013097>, 2017.
- Arunraj, K. S., Jena, B. K., Suseentharan, V. and Rajkumar, J.: Variability in Eddy Distribution Associated With East India Coastal Current From High-Frequency Radar Observations Along Southeast Coast of India, *J. Geophys. Res. Ocean.*, 123(12), 9101–9118, doi:<https://doi.org/10.1029/2018JC014041>, 2018.
- Astraldi, M. and Gasparini, G. P.: The seasonal characteristics of the circulation in the north Mediterranean basin and their relationship with the atmospheric-climatic conditions, *J. Geophys. Res. Ocean.*, 97(C6), 9531–9540, doi:<https://doi.org/10.1029/92JC00114>, 1992.
- Bagagli, L., Falco, P. and Zambianchi, E.: Eddy Detection in HF Radar-Derived Surface Currents in the Gulf of Naples, *Remote Sens.*, 12(1), doi:[10.3390/rs12010097](https://doi.org/10.3390/rs12010097), 2020.
- Barrick, D. E.: A coastal radar system for tsunami warning, *Remote Sens. Environ.*, 8(4), 353–358, doi:[https://doi.org/10.1016/0034-4257\(79\)90034-8](https://doi.org/10.1016/0034-4257(79)90034-8), 1979.



- Barrick, D. and Lipa, B.: Correcting for distorted antenna patterns in CODAR ocean surface measurements, *IEEE J. Ocean. Eng.*, 11(2), 304–309, doi:10.1109/JOE.1986.1145158, 1986.
- !125 Barrick, D., Fernandez, V., Ferrer, M. I., Whelan, C. and Breivik, Ø.: A short-term predictive system for surface currents from a rapidly deployed coastal HF radar network, *Ocean Dyn.*, 62(5), 725–740, doi:10.1007/s10236-012-0521-0, 2012.
- Barth, A., Alvera-Azcárate, A. and Weisberg, R. H.: Assimilation of high-frequency radar currents in a nested model of the West Florida Shelf, *J. Geophys. Res. Ocean.*, 113(8), doi:10.1029/2007JC004585, 2008.
- Barth, A., Troupin, C., Reyes, E., Alvera-Azcárate, A., Beckers, J.-M. and Tintoré, J.: Variational interpolation of high-frequency radar surface currents using DIVAnd, *Ocean Dyn.*, doi:10.1007/s10236-020-01432-x, 2021.
- !130 Basañez, A., Lorente, P., Montero, P., Álvarez-Fanjul, E. and Pérez-Muñuzuri, V.: Quality assessment and practical interpretation of the wave parameters estimated by HF radars in NW Spain, *Remote Sens.*, 12(4), doi:10.3390/rs12040598, 2020.
- Basañez, A. and Pérez-Muñuzuri, V.: HF Radars for Wave Energy Resource Assessment Offshore NW Spain, *Remote Sens.*, 13(11), doi:10.3390/rs13112070, 2021.
- !135 Beckers, J. M. and Rixen, M.: EOF Calculations and Data Filling from Incomplete Oceanographic Datasets, *J. Atmos. Ocean. Technol.*, 20(12), 1839–1856, doi:10.1175/1520-0426(2003)020<1839:ECADFF>2.0.CO;2, 2003.
- Behrenfeld, M. J., O'Malley, R. T., Siegel, D. A., McClain, C. R., Sarmiento, J. L., Feldman, G. C., Milligan, A. J., Falkowski, P. G., Letelier, R. M. and Boss, E. S.: Climate-driven trends in contemporary ocean productivity, *Nature*, 444(7120), 752–755, doi:10.1038/nature05317, 2006.
- !140 Benaïchouche, S., Legoff, C., Guichoux, Y., Rousseau, F. and Fablet, R.: Unsupervised Reconstruction of Sea Surface Currents from AIS Maritime Traffic Data Using Trainable Variational Models, *Remote Sens.*, 13(16), doi:10.3390/rs13163162, 2021.
- Berta, M., Bellomo, L., Magaldi, M. G., Griffà, A., Molcard, A., Marmain, J., Borghini, M. and Taillandier, V.: Estimating Lagrangian transport blending drifters with HF radar data and models: Results from the TOSCA experiment in the Ligurian Current (North Western Mediterranean Sea), *Prog. Oceanogr.*, 128, 15–29, doi:10.1016/j.pocean.2014.08.004, 2014a.
- !145 Berta, M., Ursella, L., Nencioli, F., Doglioli, A. M., Petrenko, A. A. and Cosoli, S.: Surface transport in the Northeastern Adriatic Sea from FSLE analysis of HF radar measurements, *Cont. Shelf Res.*, 77, 14–23, doi:https://doi.org/10.1016/j.csr.2014.01.016, 2014b.
- Berta, M., Bellomo, L., Griffà, A., Magaldi, M. G., Molcard, A., Mantovani, C., Gasparini, G. P., Marmain, J., Vetrano, A., Béguery, L., Borghini, M., Barbin, Y., Gaggelli, J. and Quentin, C.: Wind-induced variability in the Northern Current (northwestern Mediterranean Sea) as depicted by a multi-platform observing system, *Ocean Sci.*, 14(4), 689–710, doi:10.5194/os-14-689-2018, 2018.
- !150 Berta, M., Corgnati, L., Magaldi, M. G., Griffà, A., Mantovani, C., Rubio, A., Reyes, E. and Mader, J.: Small scale ocean weather during an extreme wind event in the Ligurian Sea. In: Copernicus Marine Service Ocean State Report, Issue 4, *J. Oper. Oceanogr.*, 13(S1), S149–S155, doi:10.1080/1755876X.2020.1785097, 2020.
- !155

- Bettencourt, J., López, C., Hernández-García, E., Montes, I., Sudre, J., Dewitte, B., Paulmier, A., and Garçon, V.: Boundaries of the Peruvian oxygen minimum zone shaped by coherent mesoscale dynamics, *Nature Geoscience*, 8, 937–940, <https://doi.org/doi:10.1038/ngeo2570>, 2015.
- Bjorkstedt, E., and J. Roughgarden: Larval transport and coastal upwelling: An application of HF radar in ecological research. *Oceanography* 10(2):64–67, <https://doi.org/10.5670/oceanog.1997.25>, 1997
- !160 Bolado-Penagos, M., Sala, I., Gomiz-Pascual, J. J., Romero-Cózar, J., González-Fernández, D., Reyes-Pérez, J., Vázquez, A. and Bruno, M.: Revising the effects of local and remote atmospheric forcing on the Atlantic Jet and Western Alboran Gyre dynamics, *J. Geophys. Res. Ocean.*, 126, e2020JC016173, doi:<https://doi.org/10.1029/2020JC016173>, 2021.
- Bourg, N. and Molcard, A.: Northern boundary current variability and mesoscale dynamics: a long-term HF RADAR monitoring in the North-Western Mediterranean Sea, *Ocean Dyn.*, doi:10.1007/s10236-021-01466-9, 2021.
- !165 Breivik, Ø. and Satra, Ø.: Real time assimilation of HF radar currents into a coastal ocean model, *J. Mar. Syst.*, 28(3–4), 161–182, doi:10.1016/S0924-7963(01)00002-1, 2001.
- Breivik, Ø., Allen, A. A., Maisondieu, C. and Olagnon, M.: Advances in search and rescue at sea Topical Collection on Advances in Search and Rescue at Sea, *Ocean Dyn.*, 63(1), 83–88, doi:10.1007/s10236-012-0581-1, 2013.
- !170 BRGM/RP-55765-FR : Tsunamis: étude de cas au niveau de la côte méditerranéenne française, Rapport de synthèse, Décembre 2007
- Brzezinski, M. A. and Washburn, L.: Phytoplankton primary productivity in the Santa Barbara Channel: Effects of wind-driven upwelling and mesoscale eddies, *J. Geophys. Res. Ocean.*, 116(C12), doi:<https://doi.org/10.1029/2011JC007397>, 2011.
- Bué, I., Semedo, Á. and Catalão, J.: Evaluation of HF Radar Wave Measurements in Iberian Peninsula by Comparison with Satellite Altimetry and in Situ Wave Buoy Observations, *Remote Sens.*, 12(21), doi:10.3390/rs12213623, 2020.
- !175 Caballero, A., Mulet, S., Ayoub, N., Manso-Narvarte, I., Davila, X., Boone, C., Toublanc, F. and Rubio, A.: Integration of HF Radar Observations for an Enhanced Coastal Mean Dynamic Topography, *Front. Mar. Sci.*, 7, doi:10.3389/fmars.2020.588713, 2020.
- Caldeira, R. M. A., Couvelard, X., Casella, E. and Vetrano, A.: Asymmetric eddy populations in adjacent basins—a high resolution numerical study of the Tyrrhenian and Ligurian Seas, *Ocean Sci. Discuss.*, 9(6), 3521–3566, doi:10.5194/osd-9-3521-2012, 2012.
- !180 Candela, J., Mazzola, S., Sammari, C., Limeburner, R., Lozano, C. J., Patti, B. and Bonanno, A.: The “Mad Sea” Phenomenon in the Strait of Sicily, *J. Phys. Oceanogr.*, 29(9), 2210–2231, doi:10.1175/1520-0485(1999)029<2210:TMSPTIT>2.0.CO;2, 1999.
- !185 Capet, A., Fernández, V., She, J., Dabrowski, T., Umgiesser, G., Staneva, J., Mészáros, L., Campuzano, F., Ursella, L., Nolan, G. and El Serafy, G.: Operational Modeling Capacity in European Seas—An EuroGOOS Perspective and Recommendations for Improvement, *Front. Mar. Sci.*, 7, 129 [online]. Available from: <https://www.frontiersin.org/article/10.3389/fmars.2020.00129>, 2020.

- Capodici, F., Ciraolo, G., Cosoli, S., Maltese, A., Mangano, M. C. and Sarà, G.: Downscaling hydrodynamics features to depict causes of major productivity of Sicilian-Maltese area and implications for resource management, *Sci. Total Environ.*, 628–629, 815–825, doi:<https://doi.org/10.1016/j.scitotenv.2018.02.106>, 2018.
- Charney, J. G.: Geostrophic Turbulence, *J. Atmos. Sci.*, 28(6), 1087–1095, doi:[10.1175/1520-0469\(1971\)028<1087:GT>2.0.CO;2](https://doi.org/10.1175/1520-0469(1971)028<1087:GT>2.0.CO;2), 1971.
- Chelton, D. B., Schlax, M. G. and Samelson, R. M.: Global observations of nonlinear mesoscale eddies, *Prog. Oceanogr.*, 91(2), 167–216, doi:<https://doi.org/10.1016/j.pocean.2011.01.002>, 2011.
- Cianelli, D., Uttieri, M., Guida, R., Menna, M., Buonocore, B., Falco, P., Zambardino, G. and Zambianchi, E.: Land-based remote sensing of coastal basins: Use of an HF radar to investigate surface dynamics and transport processes in the Gulf of Naples, in *Remote Sensing: Techniques, Applications and Technologies*, pp. 1–30., 2013.
- Cianelli, D., D’Alelio, D., Uttieri, M., Samo, D., Zingone, A., Zambianchi, E. and D’Alcalà, M. R.: Disentangling physical and biological drivers of phytoplankton dynamics in a coastal system, *Sci. Rep.*, 7(1), 1–15, doi:[10.1038/s41598-017-15880-x](https://doi.org/10.1038/s41598-017-15880-x), 2017.
- Ciuffardi, T., Napolitano, E., Iacono, R., Reseghetti, F., Raiteri, G. and Bordone, A.: Analysis of surface circulation structures along a frequently repeated XBT transect crossing the Ligurian and Tyrrhenian Seas, *Ocean Dyn.*, 66(6), 767–783, doi:[10.1007/s10236-016-0954-y](https://doi.org/10.1007/s10236-016-0954-y), 2016.
- Cohuet, J. B., Romero, R., Homar, V., Ducrocq, V. and Ramis, C.: Initiation of a severe thunderstorm over the Mediterranean Sea, *Atmos. Res.*, 100(4), 603–620, doi:<https://doi.org/10.1016/j.atmosres.2010.11.002>, 2011.
- Coll, M., Piroddi, C., Steenbeek, J., Kaschner, K., Ben Rais Lasram, F., Aguzzi, J., Ballesteros, E., Bianchi, C. N., Corbera, J., Dailianis, T., Danovaro, R., Estrada, M., Frogliani, C., Galil, B. S., Gasol, J. M., Gertwagen, R., Gil, J., Guilhaumon, F., Kesner-Reyes, K., Kitsos, M.-S., Koukouras, A., Lampadariou, N., Laxamana, E., López-Fé de la Cuadra, C. M., Lotze, H. K., Martin, D., Mouillot, D., Oro, D., Raicevich, S., Rius-Barile, J., Saiz-Salinas, J. I., San Vicente, C., Somot, S., Templado, J., Turon, X., Vafidis, D., Villanueva, R. and Voultsiadou, E.: The Biodiversity of the Mediterranean Sea: Estimates, Patterns, and Threats, *PLoS One*, 5(8), e11842 [online] Available from: <https://doi.org/10.1371/journal.pone.0011842>, 2010.
- Conti, D., Orfila, A., Mason, E., Sayol, J. M., Simarro, G. and Balle, S.: An eddy tracking algorithm based on dynamical systems theory, *Ocean Dyn.*, 66(11), 1415–1427, doi:[10.1007/s10236-016-0990-7](https://doi.org/10.1007/s10236-016-0990-7), 2016.
- Cornati, L.; Mantovani, C.; Novellino, A.; Rubio, A. and Mader, J: Recommendation Report 2 on improved common procedures for HFR QC analysis. JERICO-NEXT WP5-Data Management, Deliverable 5.14, Version 1.0. Brest, France, IFREMER, 82pp, (JERICO-NEXT-WP5-D5.14-V1.). DOI: <http://dx.doi.org/10.25607/OBP-944>, 2018.
- Cornati, L. P., Mantovani, C., Griffla, A., Berta, M., Penna, P., Celentano, P., Bellomo, L., Carlson, D. F. and D’Adamo, R.: Implementation and Validation of the ISMAR High-Frequency Coastal Radar Network in the Gulf of Manfredonia (Mediterranean Sea), *IEEE J. Ocean. Eng.*, 44(2), 424–445, doi:[10.1109/JOE.2018.2822518](https://doi.org/10.1109/JOE.2018.2822518), 2019a.

- Corgnati, L., Mantovani, C., Novellino, A., Jousset, S., Cramer, R. N., and Thijsse, P.: SeaDataNet data management protocols for HF Radar data, WP9 - Deliverable D9.12. Version 1.6. SeaDataNet, 83pp. DOI: <http://dx.doi.org/10.25607/OBP-1011>, 2019b.
- !225 Corgnati, L.: LorenzoCorgnati/HFR\_Node\_Historical\_Data\_Processing: EU\_HFR\_NODE\_Historical\_Data\_Processing, <https://doi.org/10.5281/zenodo.3569519>, 10 December 2019c.
- Corgnati, L.: LorenzoCorgnati/HFR\_Node\_tools: EU\_HFR\_NODE\_Tools, <https://doi.org/10.5281/zenodo.3855461>, 26 May 2020.
- !230 [Corgnati, L., Mantovani, C., Rubio, A., Reyes, E., Rotllan, P., Novellino, A., Gorringer, P., Solabarrieta, L., Griffa, A. and Mader, J.: The Eurogoos High Frequency radar task team: a success story of collaboration to be kept alive and made growing, in 9th EuroGOOS International conference, pp. 467–474, Brest, France. \[online\] Available from: <https://hal.archives-ouvertes.fr/hal-03328829>, 2021](https://hal.archives-ouvertes.fr/hal-03328829)
- Coulliette, C., Lekien, F., Paduan, J. D., Haller, G. and Marsden, J. E.: Optimal Pollution Mitigation in Monterey Bay Based on Coastal Radar Data and Nonlinear Dynamics, *Environ. Sci. Technol.*, 41(18), 6562–6572, doi:10.1021/es0630691, 2007.
- !235 Cózar, A., Sanz-Martín, M., Martí, E., González-Gordillo, J. I., Ubeda, B., Gálvez, J. Á., Irigoien, X. and Duarte, C. M.: Plastic Accumulation in the Mediterranean Sea, *PLoS One*, 10(4), e0121762 [online] Available from: <https://doi.org/10.1371/journal.pone.0121762>, 2015.
- !240 Davidson, F., Alvera-Azcárate, A., Barth, A., Brassington, G. B., Chassignet, E. P., Clementi, E., De Mey-Frémaux, P., Divakaran, P., Harris, C., Hernandez, F., Hogan, P., Hole, L. R., Holt, J., Liu, G., Lu, Y., Lorente, P., Maksymczuk, J., Martin, M., Mehra, A., Melsom, A., Mo, H., Moore, A., Oddo, P., Pascual, A., Pequignet, A.-C., Kourafalou, V., Ryan, A., Siddorn, J., Smith, G., Spindler, D., Spindler, T., Stanev, E. V., Staneva, J., Storto, A., Tanajura, C., Vinayachandran, P. N., Wan, L., Wang, H., Zhang, Y., Zhu, X. and Zu, Z.: Synergies in Operational Oceanography: The Intrinsic Need for Sustained Ocean Observations, *Front. Mar. Sci.*, 6, 450, doi:10.3389/fmars.2019.00450, 2019.
- !245 Davila, X., Rubio, A., Artigas, L. F., Puillat, I., Manso-Narvarte, I., Lazare, P. and Caballero, A.: Coastal submesoscale processes and their effect on phytoplankton distribution in the southeastern Bay of Biscay, *Ocean Sci.*, 17(3), 849–870, doi:10.5194/os-17-849-2021, 2021.
- De Alfonso, M., Lin-Ye, J., García-Valdecasas, J. M., Pérez-Rubio, S., Luna, M. Y., Santos-Muñoz, D., Ruiz, M. I., Pérez-Gómez, B. and Álvarez-Fanjul, E.: Storm Gloria: Sea State Evolution Based on in situ Measurements and Modeled Data and Its Impact on Extreme Values, *Front. Mar. Sci.*, 8, 270, doi:10.3389/fmars.2021.646873, 2021.
- !250 De Dominicis, M., Pinarđi, N., Zodiatis, G. and Lardner, R.: MEDSLIK-II, a Lagrangian marine surface oil spill model for short-term forecasting – Part 1: Theory, *Geosci. Model Dev.*, 6(6), 1851–1869, doi:10.5194/gmd-6-1851-2013, 2013a.
- De Dominicis, M., Pinarđi, N., Zodiatis, G. and Archetti, R.: MEDSLIK-II, a Lagrangian marine surface oil spill model for short-term forecasting – Part 2: Numerical simulations and validations, *Geosci. Model Dev.*, 6(6), 1871–1888, doi:10.5194/gmd-6-1871-2013, 2013b.

- De Mey-Frémaux, P., Ayoub, N., Barth, A., Brewin, R., Charria, G., Campuzano, F., Ciavatta, S., Cirano, M., Edwards, C. A.,  
!255 Federico, I., Gao, S., Garcia Hermosa, I., Garcia Sotillo, M., Hewitt, H., Hole, L. R., Holt, J., King, R., Kourafalou, V., Lu,  
Y., Mourre, B., Pascual, A., Staneva, J., Stanev, E. V., Wang, H. and Zhu, X.: Model-Observations Synergy in the Coastal  
Ocean, *Front. Mar. Sci.*, 6, 436, doi:10.3389/fmars.2019.00436, 2019.
- Declerck, A., Delpy, M., Rubio, A., Ferrer, L., Basurko, O. C., Mader, J. and Louzao, M.: Transport of floating marine litter  
in the coastal area of the south-eastern Bay of Biscay: A Lagrangian approach using modelling and observations, *J. Oper.*  
!260 *Oceanogr.*, 12(sup2), S111–S125, doi:10.1080/1755876X.2019.1611708, 2019.
- Denamiel, C., Šepić, J., Ivanković, D. and Vilibić, I.: The Adriatic Sea and Coast modelling suite: Evaluation of the  
meteotsunami forecast component, *Ocean Model.*, 135, 71–93, doi:10.1016/j.ocemod.2019.02.003, 2019.
- Di Muccio, S., Rak, G., Giordano, P., Mannozi, M., Sammarini, V., Alcaro, L., de la Fuente Origlia, A., Amato, E., & Renzi,  
P.: Quaderni delle Emergenze Ambientali in Mare. 05-Modalità di campionamento degli idrocarburi in mare e lungo la costa.  
!265 La valutazione della contaminazione del litorale a seguito di oil spill. ISBN 978-88-448-0579-1, 2020.
- Domps, B., Marmain, J. and Guérin, C.-A.: A Reanalysis of the October 2016 "Meteotsunami" in British Columbia With  
Help of High-Frequency Radars and Autoregressive Modeling, *arXiv Atmos. Ocean. Phys.*, 2020.
- Dong, C., McWilliams, J. C., Liu, Y. and Chen, D.: Global heat and salt transports by eddy movement, *Nat. Commun.*, 5(1),  
3294, doi:10.1038/ncomms4294, 2014.
- !270 Drago, A.: Numerical modelling of coastal seiches in Malta, *Phys. Chem. Earth, Parts A/B/C*, 33(3), 260–275,  
doi:https://doi.org/10.1016/j.pce.2007.02.001, 2008.
- Dumas, D. and Guérin, C.-A.: Self-calibration and antenna grouping for bistatic oceanographic High-Frequency Radars, 2020.
- Dzvonkovskaya, A.: Ocean surface current measurements using HF radar during the 2011 Japan tsunami hitting Chilean coast,  
2012 IEEE Int. Geosci. Remote Sens. Symp., 7605–7608, 2012.
- !275 Dzvonkovskaya, A. L. and Rohling, H.: HF radar ship detection and tracking using WERA system, in 2007 IET International  
Conference on Radar Systems, pp. 1–5., https://doi.org/10.1049/cp:20070478, 2007.
- Dzvonkovskaya, A., Petersen, L. and Insua, T. L.: Real-time capability of meteotsunami detection by WERA ocean radar  
system, in 2017 IEEE18th International Radar Symposium (IRS), pp. 1–10., DOI: 10.23919/IRS.2017.8008096, 2017.
- Ebling, J. and Scheuermann, G.: Clifford convolution and pattern matching on vector fields. In *IEEE Visualization*, 2003. VIS  
!280 2003., 193–200, DOI: 10.1109/VISUAL.2003.1250372, 2003.
- European Commission: The EU Blue Economy Report 2020. Publications Office of the European Union. Luxembourg.  
https://op.europa.eu/s/u0bL, 2020.
- Falco, P., Buonocore, B., Cianelli, D., De Luca, L., Giordano, A., Iermano, I., Kalampokis, A., Saviano, S., Uttieri, M.,  
Zambardino, G. and Zambianchi, E.: Dynamics and sea state in the Gulf of Naples: potential use of high-frequency radar data  
!285 in an operational oceanographic context, *J. Oper. Oceanogr.*, 9(sup1), s33–s45, doi:10.1080/1755876X.2015.1115633, 2016.
- Fang, F. and Morrow, R.: Evolution, movement and decay of warm-core Leeuwin Current eddies, *Deep Sea Res. Part II Top.*  
*Stud. Oceanogr.*, 50(12), 2245–2261, doi:https://doi.org/10.1016/S0967-0645(03)00055-9, 2003.

- Fossi, M. C., Romeo, T., Bains, M., Panti, C., Marsili, L., Campani, T., Canese, S., Galgani, F., Druon, J.-N., Airoldi, S., Taddei, S., Fattorini, M., Brandini, C. and Lapucci, C.: Plastic Debris Occurrence, Convergence Areas and Fin Whales Feeding Ground in the Mediterranean Marine Protected Area Pelagos Sanctuary: A Modeling Approach, *Front. Mar. Sci.*, 4, 167, doi:10.3389/fmars.2017.00167, 2017.
- Fox-Kemper, B., Adcroft, A., Böning, C. W., Chassignet, E. P., Curchitser, E., Danabasoglu, G., Eden, C., England, M. H., Gerdes, R., Greatbatch, R. J., Griffies, S. M., Hallberg, R. W., Hanert, E., Heimbach, P., Hewitt, H. T., Hill, C. N., Komuro, Y., Legg, S., Le Sommer, J., Masina, S., Marsland, S. J., Penny, S. G., Qiao, F., Ringler, T. D., Treguier, A. M., Tsujino, H., Uotila, P. and Yeager, S. G.: Challenges and Prospects in Ocean Circulation Models, *Front. Mar. Sci.*, 6:65, doi:10.3389/fmars.2019.00065, 2019.
- Frolov, S., Paduan, J., Cook, M. and Bellingham, J.: Improved statistical prediction of surface currents based on historic HF-radar observations, *Ocean Dyn.*, 62, 1111–1122, doi:10.1007/s10236-012-0553-5, 2012.
- Fujii, S., Heron, M. L., Kim, K., Lai, J.-W., Lee, S.-H., Wu, X., Wu, X., Wyatt, L. R. and Yang, W.-C.: An overview of developments and applications of oceanographic radar networks in Asia and Oceania countries, *Ocean Sci. J.*, 48(1), 69–97, doi:10.1007/s12601-013-0007-0, 2013.
- Gabrie, C., Lagabrielle, E., Bissery, C., Crochelet, E., Meola, B., Webster, C., Claudet, J., Chassanite, A., Marinesque, S., Robert, P., Goutx, M. and Quod, C.: The Status of Marine Protected Areas in the Mediterranean Sea. MedPAN & RAC/SPA. Ed: MedPAN Collection., 2012.
- García-Lafuente, J., Delgado, J. and Criado, F.: Inflow interruption by meteorological forcing in the Strait of Gibraltar, *Geophys. Res. Lett.*, 29(19), 20–24, doi:https://doi.org/10.1029/2002GL015446, 2002.
- [García-Sánchez, G., Mancho, A. M., Ramos, A. G., Coca, J. and Wiggins, S.: Structured pathways in the turbulence organizing recent oil spill events in the Eastern Mediterranean, \*Sci. Rep.\*, 12\(1\), 3662, doi:10.1038/s41598-022-07350-w, 2022.](#)
- Garrett, C.J.R.: Variable sea level and strait flows in the Mediterranean: a theoretical study of the response to meteorological forcing. *Oceanologica Acta*, 6 (1), 79-88, 1983.
- Gildor, H., Fredj, E., Steinbuck, J. and Monismith, S.: Evidence for Submesoscale Barriers to Horizontal Mixing in the Ocean from Current Measurements and Aerial Photographs, *J. Phys. Oceanogr.*, 39(8), 1975–1983, doi:10.1175/2009JPO4116.1, 2009.
- Gómez-Navarro, L., Fablet, R., Mason, E., Pascual, A., Mourre, B., Cosme, E. and Le Sommer, J.: SWOT Spatial Scales in the Western Mediterranean Sea Derived from Pseudo-Observations and an Ad Hoc Filtering, *Remote Sens.*, 10(4), doi:10.3390/rs10040599, 2018.
- Gómez, M., Álvarez-Fanjul, E., Carretero, J. C., Pérez-Gómez, B., Rodríguez, I., Serrano, O., Sotillo, M.G.: Oceanographic and atmospheric analysis of the 10-16 November 2001 Storm in the Western Mediterranean. In Proceedings of the 4th EGS Plinius Conference on Mediterranean Storms, Mallorca, 2002.

- !320 Gommenginger, C., Martin, A. C. H., Jacob, B., and Staneva, J.: Multi-year assessment of ocean surface currents from Copernicus Sentinel-1 and HF radar in the German Bight, EGU General Assembly 2021, online, 19–30 Apr 2021, EGU21-15280. <https://doi.org/10.5194/egusphere-egu21-15280>, 2021
- Griffa, A., Horstmann, J., Mader, J., Rubio, A., Berta, M., Orfila, A., Lars, A.: Report on final assessment of methodological improvements and testing. JERICO-NEXT WP3 Innovations in Technology and Methodology, Deliverable D3.4, Version 2.
- !325 Brest, France, IFREMER, 56pp. (JERICO-NEXT-WP3-D3.4-180719-V2). DOI: <http://dx.doi.org/10.25607/OBP-948>, 2019.
- Grilli S.T., Grosdidier S., Guérin CA.: Tsunami Detection by High-Frequency Radar Beyond the Continental Shelf. In: Geist E.L., Fritz H.M., Rabinovich A.B., Tanioka Y. (eds) *Global Tsunami Science: Past and Future*, Volume I. pp 3895-3934. Springer, 2015.
- Guérin, C.-A., Grilli, S., Moran, P., Grilli, A. and Insua, T.: Tsunami detection by high-frequency radar in British Columbia: performance assessment of the time-correlation algorithm for synthetic and real events, *Ocean Dyn.*, 68, 423–438, doi:10.1007/s10236-018-1139-7, 2018.
- !330 Guihou, K., Marmain, J., Ourmieres, Y., Molcard, A., Zakardjian, B., & Forget, P.: A case study of the mesoscale dynamics in the North-Western Mediterranean Sea: a combined data-model approach, *Ocean Dyn.*, 63(7), 793–808, doi:10.1007/s10236-013-0619-z, 2013.
- !335 Gurgel, K., Essen, H. and Schlick, T.: An Empirical Method to Derive Ocean Waves From Second-Order Bragg Scattering: Prospects and Limitations, *IEEE J. Ocean. Eng.*, 31(4), 804–811, doi:10.1109/JOE.2006.886225, 2006.
- Gurgel, K.-W., Dzvonkovskaya, A., Pohlmann, T., Schlick, T. and Gill, E.: Simulation and detection of tsunami signatures in ocean surface currents measured by HF radar, *Ocean Dyn.*, 61(10), 1495–1507, doi:10.1007/s10236-011-0420-9, 2011.
- Haller, G.: Lagrangian Coherent Structures, *Annu. Rev. Fluid Mech.*, 47(1), 137–162, doi:10.1146/annurev-fluid-010313-141322, 2015.
- !340 Haza, A. C., Özgökmen, T. M., Griffa, A., Molcard, A., Poulain, P.-M. and Peggion, G.: Transport properties in small-scale coastal flows: relative dispersion from VHF radar measurements in the Gulf of La Spezia, *Ocean Dyn.*, 60(4), 861–882, doi:10.1007/s10236-010-0301-7, 2010.
- Headrick, J. M. and Thomason, J. F.: Applications of high-frequency radar, *Radio Sci.*, 33(4), 1045–1054, doi:https://doi.org/10.1029/98RS01013, 1998.
- !345 Heiberg, E., Ebberts, T., Wigstrom, L. and Karlsson, M.: Three-dimensional flow characterization using vector pattern matching, *IEEE Trans. Vis. Comput. Graph.*, 9(3), 313–319, doi:10.1109/TVCG.2003.1207439, 2003.
- Hernández-Carrasco, I., Rossi, V., Hernández-García, E., Garçon, V. and López, C.: The reduction of plankton biomass induced by mesoscale stirring: A modeling study in the Benguela upwelling, *Deep Sea Res. Part I Oceanogr. Res. Pap.*, 83, doi:https://doi.org/10.1016/j.dsr.2013.09.003, 2014.
- !350 Hernández-Carrasco, I., Orfila, A., Rossi, V. and Garçon, V.: Effect of small scale transport processes on phytoplankton distribution in coastal seas, *Sci. Rep.*, 8(1), 1–13, doi:10.1038/s41598-018-26857-9, 2018a.

**Eliminado:** Hernández-Carrasco, I., López, C., Hernández-García, E. and Turiel, A.: How reliable are finite-size Lyapunov exponents for the assessment of ocean dynamics?, *Ocean Model.*, 36(3), 208–218, doi:https://doi.org/10.1016/j.ocemod.2010.12.006, 2011.¶

Hernández-Carrasco, I., Solabarrieta, L., Rubio, A., Esnaola, G., Reyes, E. and Orfila, A.: Impact of HF radar current gap-filling methodologies on the Lagrangian assessment of coastal dynamics, *Ocean Sci.*, 14(4), 827–847, doi:10.5194/os-14-827-2018, 2018b.

1360 Hernández-Carrasco, I., Alou-Font, E., Dumont, P.-A., Cabornero, A., Allen, J. and Orfila, A.: Lagrangian flow effects on phytoplankton abundance and composition along filament-like structures, *Prog. Oceanogr.*, 189, 102469, doi:https://doi.org/10.1016/j.pocean.2020.102469, 2020.

Hernández-Lasheras, J., Mourre, B., Orfila, A., Santana, A., Reyes, E. and Tintoré, J.: Evaluating High-Frequency radar data assimilation impact in coastal ocean operational modelling, *Ocean Sci. Discuss.*, 2021, 1–29, doi:10.5194/os-2021-34, 2021.

1365 Hernandez, F., Blockley, E., Brassington, G. B., Davidson, F., Divakaran, P., Drévillon, M., Ishizaki, S., Garcia-Sotillo, M., Hogan, P. J., Lagema, P., Levier, B., Martin, M., Mehra, A., Mooers, C., Ferry, N., Ryan, A., Regnier, C., Sellar, A., Smith, G. C., Sofianos, S., Spindler, T., Volpe, G., Wilkin, J., Zaron, E. D. and Zhang, A.: Recent progress in performance evaluations and near real-time assessment of operational ocean products, *J. Oper. Oceanogr.*, 8(November), s221–s238, doi:10.1080/1755876X.2015.1050282, 2015.

1370 Heron, M. L.: Applying a unified directional wave spectrum to the remote sensing of wind wave directional spreading, *Can. J. Remote Sens.*, 28(3), 346–353, doi:10.5589/m02-030, 2002.

Huang, W., Gill, E., Wu, S., Wen, B., Yang, Z. and Hou, J.: Measuring Surface Wind Direction by Monostatic HF Ground-Wave Radar at the Eastern China Sea, *Ocean. Eng. IEEE J.*, 29, 1032–1037, doi:10.1109/JOE.2004.834175, 2004.

1375 Iermano, I., Moore, A. M. and Zambianchi, E.: Impacts of a 4-dimensional variational data assimilation in a coastal ocean model of southern Tyrrhenian Sea, *J. Mar. Syst.*, 154, 157–171, doi:https://doi.org/10.1016/j.jmarsys.2015.09.006, 2016.

In: Copernicus Marine Service Ocean State Report, Issue 4, *J. Oper. Oceanogr.*, 13(S1), s54–s59, doi:10.1080/1755876X.2020.1785097, 2020.

Isern-Fontanet, J., García-Ladona, E. and Font, J.: Identification of Marine Eddies from Altimetric Maps, *J. Atmos. Ocean. Technol.*, 20(5), 772–778, doi:10.1175/1520-0426(2003)20<772:IOMEFA>2.0.CO;2, 2003.

Janeković, I., Mihanović, H., Vilibić, I., Grčić, B., Ivatek-Šahdan, S., Tudor, M. and Djakovac, T.: Using multi-platform 4D-Var data assimilation to improve modeling of Adriatic Sea dynamics, *Ocean Model.*, 146, 101538, doi:https://doi.org/10.1016/j.ocemod.2019.101538, 2020.

Jansa, A., Monserrat, S. and Gomis, D.: The rissaga of 15 June 2006 in Ciutadella (Menorca), a meteorological tsunami, *Adv. Geosci.*, 12, 1–4, doi:10.5194/adgeo-12-1-2007, 2007.

1385 Jeong, J. and Hussain, F.: On the identification of a vortex, *J. Fluid Mech.*, 285, 69–94, doi:DOI: 10.1017/S0022112095000462, 1995.

Juza, M. and Tintoré, J.: Multivariate Sub-Regional Ocean Indicators in the Mediterranean Sea: From Event Detection to Climate Change Estimations, *Front. Mar. Sci.*, 8, 233 [online] Available from: 1390 https://www.frontiersin.org/article/10.3389/fmars.2021.610589, 2021.



- 1395 Juza, M., Mourre, B., Renault, L., Gómara, S., Sebastián, K., Lora, S., Beltran, J. P., Frontera, B., Garau, B., Troupin, C., Torner, M., Heslop, E., Casas, B., Escudier, R., Vizoso, G. and Tintoré, J.: SOCIB operational ocean forecasting system and multi-platform validation in the western mediterranean sea, *J. Oper. Oceanogr.*, 9(August), s155–s166, doi:10.1080/1755876X.2015.1117764, 2016.
- 1400 Kaplan, D. M. and Lekien, F.: Spatial interpolation and filtering of surface current data based on open-boundary modal analysis, *J. Geophys. Res. Ocean.*, 112(12), 1–20, doi:10.1029/2006JC003984, 2007.
- Kaplan, A., Kushnir, Y., Cane, M. A. and Blumenthal, M. B.: Reduced space optimal analysis for historical data sets: 136 years of Atlantic sea surface temperatures, *J. Geophys. Res. Ocean.*, 102(C13), 27835–27860, doi:https://doi.org/10.1029/97JC01734, 1997.
- 1405 Kazeminezhad, M. H., Vilibić, I., Denamiel, C., Ghafarian, P. and Negah, S.: Weather radar and ancillary observations of the convective system causing the northern Persian Gulf meteotsunami on 19 March 2017, *Nat. Hazards*, 106, 1747–1769, doi:10.1007/s11069-020-04208-0, 2020.
- Kim, S. Y., Terrill, E. J. and Cornuelle, B. D.: Mapping surface currents from HF radar radial velocity measurements using optimal interpolation, *J. Geophys. Res. Ocean.*, 113(10), 1–16, doi:10.1029/2007JC004244, 2008.
- 1410 Kirincich, A.: Remote Sensing of the Surface Wind Field over the Coastal Ocean via Direct Calibration of HF Radar Backscatter Power, *J. Atmos. Ocean. Technol.*, 33(7), 1377–1392, doi:10.1175/JTECH-D-15-0242.1, 2016a.
- Kirincich, A.: The Occurrence, Drivers, and Implications of Submesoscale Eddies on the Martha’s Vineyard Inner Shelf, *J. Phys. Oceanogr.*, 46(9), 2645–2662, doi:10.1175/JPO-D-15-0191.1, 2016b.
- Kohonen, T.: Self-organized formation of topologically correct feature maps, *Biol. Cybern.*, 43(1), 59–69, doi:10.1007/BF00337288, 1982.
- 1415 Kohonen, T.: *Self-Organizing Maps*, 3rd ed., Springer, Berlin, Heidelberg., 2001.
- Kohonen, T., Kaski, S., Lagus, K., Salojärvi, J., Honkela, J., Paatero, V. and Saarela, A.: Self organization of a massive document collection, *IEEE Trans. neural networks*, 11 3, 574–585, 2000.
- Kourafalou, V. H., De Mey, P., Staneva, J., Ayoub, N., Barth, A., Chao, Y., Cirano, M., Fiechter, J., Herzfeld, M., Kurapov, A., Moore, A. M., Oddo, P., Pullen, J., van der Westhuysen, A. and Weisberg, R. H.: Coastal Ocean Forecasting: science foundation and user benefits, *J. Oper. Oceanogr.*, 8(sup1), s147–s167, doi:10.1080/1755876X.2015.1022348, 2015a.
- Kourafalou, V. H., De Mey, P., Staneva, J., Ayoub, N., Barth, A., Chao, Y., Cirano, M., Fiechter, J., Herzfeld, M., Kurapov, A., Moore, A. M., Oddo, P., Pullen, J., van der Westhuysen, A. and Weisberg, R. H.: Coastal Ocean Forecasting: science foundation and user benefits, *J. Oper. Oceanogr.*, 8(sup1), s147–s167, doi:10.1080/1755876X.2015.1022348, 2015b.
- 1420 Lai, Y., Zhou, H., Yang, J., Zeng, Y. and Wen, B.: Submesoscale Eddies in the Taiwan Strait Observed by High-Frequency Radars: Detection Algorithms and Eddy Properties, *J. Atmos. Ocean. Technol.*, 34(4), 939–953, doi:10.1175/JTECH-D-16-0160.1, 2017.
- Lana, A., Marmain, J., Fernández, V., Tintoré, J. and Orfila, A.: Wind influence on surface current variability in the Ibiza Channel from HF Radar, *Ocean Dyn.*, 66(4), 483–497, doi:10.1007/s10236-016-0929-z, 2016.

- !425 Laws, K. E., Vesecky, J. F., Lovellette, M. N. and Paduan, J. D.: Ship tracking by HF radar in coastal waters, in OCEANS 2016 MTS/IEEE Monterey, pp. 1–8., <https://doi.org/10.1109/OCEANS.2016.7761012>
- Le Vu, B., Stegner, A. and Arsouze, T.: Angular Momentum Eddy Detection and Tracking Algorithm (AMEDA) and Its Application to Coastal Eddy Formation, *J. Atmos. Ocean. Technol.*, 35(4), 739–762, doi:10.1175/JTECH-D-17-0010.1, 2018.
- Lehahn, Y., d'Ovidio, F., Lévy, M. and Heifetz, E.: Stirring of the northeast Atlantic spring bloom: A Lagrangian analysis based on multisatellite data, *J. Geophys. Res. Ocean.*, 112(C8), doi:<https://doi.org/10.1029/2006JC003927>, 2007.
- !430 Lekien, F., Coulliette, C., Bank, R. and Marsden, J.: Open-boundary modal analysis: Interpolation, extrapolation, and filtering, *J. Geophys. Res. C Ocean.*, 109(12), 1–13, doi:10.1029/2004JC002323, 2004.
- Lekien, F., Coulliette, C., Mariano, A. J., Ryan, E. H., Shay, L. K., Haller, G. and Marsden, J.: Pollution release tied to invariant manifolds: A case study for the coast of Florida, *Phys. D Nonlinear Phenom.*, 210(1), 1–20, doi:<https://doi.org/10.1016/j.physd.2005.06.023>, 2005.
- !435 Ličer, M., Mourre, B., Troupin, C., Kriemeyer, A., Jansá, A. and Tintoré, J.: Numerical study of Balearic meteotsunami generation and propagation under synthetic gravity wave forcing, *Ocean Model.*, 111, 38–45, doi:10.1016/j.ocemod.2017.02.001, 2017.
- Ličer, M., Estival, S., Reyes-Suarez, C., Deponte, D. and Fettich, A.: Lagrangian modelling of a person lost at sea during the Adriatic scirocco storm of 29 October 2018, *Nat. Hazards Earth Syst. Sci.*, 20(8), 2335–2349, doi:10.5194/nhess-20-2335-2020, 2020.
- !440 Lipa, B. and Nyden, B.: Directional wave information from the SeaSonde, *IEEE J. Ocean. Eng.*, 30, 221–231, 2005.
- Lipa, B., Barrick, D. E. and Maresca, J. W.: HF radar measurements of long ocean waves, *J. Geophys. Res.*, 86(C5), 4089–4102, 1981.
- !445 Lipa, B. J., Barrick, D. E., Isaacson, J. and Lilleboe, P. M.: CODAR wave measurements from a North Sea semisubmersible, *IEEE J. Ocean. Eng.*, 15(2), 119–125, doi: 10.1109/48.50697, 1990.
- Lipa, B. J., Barrick, D. E., Bourg, J. and Nyden, B. B.: HF radar detection of tsunamis, *J. Oceanogr.*, 62(5), 705–716, doi:10.1007/s10872-006-0088-9, 2006.
- Lipa, B., Barrick, D., Saitoh, S.-I., Ishikawa, Y., Awaji, T., Largier, J. and Garfield, N.: Japan Tsunami Current Flows Observed by HF Radars on Two Continents, *Remote Sens.*, 3(8), 1663–1679, doi:10.3390/rs3081663, 2011.
- !450 Lipa, B., Isaacson, J., Nyden, B. and Barrick, D.: Lipa, B. et al. Tsunami Arrival Detection with High Frequency (HF) Radar. *Remote Sens.* 2012, 4, 1448-1461, *Remote Sensing*, 4(11), pp. 3363-3363, 4, 3363, doi:10.3390/rs4113363, 2012.
- Lipa, B., Barrick, D. and Isaacson, J.: Evaluating HF Coastal Radar Site Performance for Tsunami Warning, *Remote Sens.*, 11(23), 2773, doi:10.3390/rs11232773, 2019.
- !455 Liu, Y. and Weisberg, R. H.: Evaluation of trajectory modeling in different dynamic regions using normalized cumulative Lagrangian separation, *J. Geophys. Res. Ocean.*, 116(C9), 1–13, doi:<https://doi.org/10.1029/2010JC006837>, 2011.
- Liu, Y., Weisberg, R. H. and Mooers, C. N. K.: Performance evaluation of the self-organizing map for feature extraction, *J. Geophys. Res. Ocean.*, 111(5), 1–14, doi:10.1029/2005JC003117, 2006.

- Liu, Y., Dong, C., Guan, Y., Chen, D., McWilliams, J. and Nencioli, F.: Eddy Analysis in the Subtropical Zonal Band of the North Pacific Ocean, *Deep Sea Res. Part I Oceanogr. Res. Pap.*, 68, 54–67, doi:10.1016/j.dsr.2012.06.001, 2012.
- Long, A. E. and Trizna, D. B.: Measurements and preliminary interpretation of HF radar Doppler spectra from the sea echo of an Atlantic storm, *Naval Research Laboratory: Washington, DC, USA*, p.7456, 1972.
- Long, R., Barrick, D., Largier, J. and Garfield, N.: Wave Observations from Central California: SeaSonde Systems and In Situ Wave Buoys, *J. Sensors*, 1–18, 2011, doi:10.1155/2011/728936, 2011.
- Lorente, P., Piedracoba, S., Soto-Navarro, J. and Álvarez-Fanjul, E.: Evaluating the surface circulation in the Ebro delta (northeastern Spain) with quality-controlled high-frequency radar measurements, *Ocean Sci.*, 11(6), 921–935, doi:10.5194/os-11-921-2015, 2015.
- Lorente, P., Piedracoba, S., Sotillo, M. G., Aznar, R., Amo-Baladrón, A., Pascual, A., Soto-Navarro, J. and Álvarez-Fanjul, E.: Characterizing the surface circulation in Ebro Delta (NW Mediterranean) with HF radar and modeled current data, *J. Mar. Syst.*, 163, 61–79, doi:10.1016/j.jmarsys.2016.07.001, 2016.
- Lorente, P., García-Sotillo, M., Amo-Baladrón, A., Aznar, R., Levier, B., Sánchez-Garrido, J. C., Sammartino, S., De Pascual-Collar, Á., Reffray, G., Toledano, C. and Álvarez-Fanjul, E.: Skill assessment of global, regional, and coastal circulation forecast models: Evaluating the benefits of dynamical downscaling in IBI (Iberia-Biscay-Ireland) surface waters, *Ocean Sci.*, 15(4), 967–996, doi:10.5194/os-15-967-2019, 2019a.
- Lorente, P., Piedracoba, S., Sotillo, M. G. and Álvarez-Fanjul, E.: Long-term monitoring of the Atlantic jet through the strait of Gibraltar with HF radar observations, *J. Mar. Sci. Eng.*, 7(1), doi:10.3390/jmse7010003, 2019b.
- Lorente, P., Sotillo, M. G., Amo-Baladrón, A., Aznar, R., Levier, B., Aouf, L., Dabrowski, T., Pascual, Á. De, Reffray, G., Dalphiné, A., Toledano, C., Rainaud, R. and Álvarez-Fanjul, E.: The NARVAL Software Toolbox in Support of Ocean Models Skill Assessment at Regional and Coastal Scales, in *ICCS 2019, Lecture Notes in Computer Science: Rodrigues J (ed)* (Cham: Springer). doi: 10.1007/978-3-030-22747-0\_25, 2019c.
- Lorente, P., Lin-Ye, J., García-León, M., Reyes, E., Fernandes, M., Sotillo, M. G., Espino, M., Ruiz, M. I., Gracia, V., Perez, S., Aznar, R., Alonso-Martirena, A. and Álvarez-Fanjul, E.: On the Performance of High Frequency Radar in the Western Mediterranean During the Record-Breaking Storm Gloria, *Front. Mar. Sci.*, 8, 205, doi:10.3389/fmars.2021.645762, 2021a.
- Lorente, P., Aguiar, E., Bendoni, M., Berta, M., Brandini, C., Cáceres-Euse, A., Capodici, F., Cianelli, D., Ciruolo, G., Corgnati, L., Dadić, V., Doronzo, B., Drago, A., Dumas, D., Falco, P., Fattorini, M., Gauci, A., Gómez, R., Griffa, A., Guérin, C.-A., Hernández-Carrasco, I., Hernández-Lasheras, J., Ličer, M., Magaldi, M., Mantovani, C., Mihanović, H., Molcard, A., Mourre, B., Orfila, A., Révelard, A., Reyes, E., Sánchez, J., Saviano, S., Sciascia, R., Taddei, S., Tintoré, J., Toledo, Y., Ursella, L., Uttieri, M., Vilibić, I., Zambianchi, E., Cardin, V. (accepted). Coastal HF radars in the Mediterranean: Status of operations and a framework for future development. *Ocean Sci. Discuss.*, 1–58, doi:10.5194/os-2021-119, 2021b.
- Mandal, S., Sil, S., Pramanik, S., Arunraj, K. S. and Jena, B. K.: Characteristics and evolution of a coastal mesoscale eddy in the Western Bay of Bengal monitored by high-frequency radars, *Dyn. Atmos. Ocean.*, 88(August), 101107, doi:10.1016/j.dynatmoe.2019.101107, 2019.

Eliminado: submitted to this Special Issue

- 1495 Manso-Narvarte, I., Caballero, A., Rubio, A., Dufau, C. and Birol, F.: Joint analysis of coastal altimetry and high-frequency (HF) radar data: observability of seasonal and mesoscale ocean dynamics in the Bay of Biscay, *Ocean Sci.*, 14(5), 1265–1281, doi:10.5194/os-14-1265-2018, 2018.
- Manso-Narvarte, I., Fredj, E., Jordà, G., Berta, M., Griffà, A., Caballero, A. and Rubio, A.: 3D reconstruction of ocean velocity from high-frequency radar and acoustic Doppler current profiler: a model-based assessment study, *Ocean Sci.*, 16(3), 575–591, doi:10.5194/os-16-575-2020, 2020.
- 1500 Manso-Narvarte, I., Rubio, A., Jordà, G., Carpenter, J., Merckelbach, L. and Caballero, A.: Three-Dimensional Characterization of a Coastal Mode-Water Eddy from Multiplatform Observations and a Data Reconstruction Method, *Remote Sens.*, 13(4), doi:10.3390/rs13040674, 2021.
- Mantovani, C., Corgnati, L., Horstmann, J., Rubio, A., Reyes, E., Quentin, C., Cosoli, S., Asensio, J. L., Mader, J. and Griffà, A.: Best Practices on High Frequency Radar Deployment and Operation for Ocean Current Measurement, *Front. Mar. Sci.*, 7, doi:10.3389/fmars.2020.00210, 2020.
- 1505 March, D., Metcalfe, K., Tintoré, J. and Godley, B. J.: Tracking the global reduction of marine traffic during the COVID-19 pandemic, *Nat. Commun.*, 12(1), 2415, doi:10.1038/s41467-021-22423-6, 2021.
- Maresca, S., Braca, P., Horstmann, J. and Grasso, R.: Maritime Surveillance Using Multiple High-Frequency Surface-Wave Radars, *IEEE Trans. Geosci. Remote Sens.*, 52(8), doi:10.1109/TGRS.2013.2286741, 2013.
- 1510 Marmain, J., Molcard, A., Forget, P., Barth, A. and Ourmieres, Y.: Assimilation of HF radar surface currents to optimize forcing in the northwestern Mediterranean Sea, *Nonlinear Process. Geophys.*, 21(3), 659–675, doi:10.5194/npg-21-659-2014, 2014.
- McWilliams, J. C.: A survey of submesoscale currents, *Geosci. Lett.*, 6(1), 3, doi:10.1186/s40562-019-0133-3, 2019.
- Meadows, L., Whelan, C., Barrick, D., Kroodsma, R., Ruf, C., Teague, C., Meadows, G. and Wang, S.: High frequency radar and its application to fresh water, *J. Great Lakes Res.*, 39, 183–193, doi:10.1016/j.jglr.2013.01.002, 2013.
- 1515 Medail, F. and Quézel, P.: Hot-Spots Analysis for Conservation of Plant Biodiversity in the Mediterranean Basin, *Ann. Missouri Bot. Gard.*, 84, 112–127, doi:10.2307/2399957, 1997.
- Menemenlis, D., Fukumori, I. and Lee, T.: Atlantic to Mediterranean Sea Level Difference Driven by Winds near Gibraltar Strait, *J. Phys. Oceanogr.*, 37(2), 359–376, doi:10.1175/JPO3015.1, 2007.
- 1520 Meola, B., Webster, C., Agardi, T., Bernal, M., Borg, J. A., Calò, A., Cebrian, D., Cebrian, D., Claudet, J., Daméry, C., David, L., Davis, J., El Asmi, S., Giakoumi, S., Gomei, M., Guidetti, P., Hoyt, E., Grissac, A., Kizilkaya, Z. and Tunesi, L.: The 2016 status of Marine Protected Areas in the Mediterranean, 2019.
- Miles, T., Seroka, G. and Glenn, S.: Coastal ocean circulation during Hurricane Sandy, *J. Geophys. Res. Ocean.*, 122(9), 7095–7114, doi:https://doi.org/10.1002/2017JC013031, 2017.
- 1525 Millot, C.: Circulation in the Western Mediterranean Sea, *J. Mar. Syst.*, 20(1), 423–442, doi:https://doi.org/10.1016/S0924-7963(98)00078-5, 1999.

**Eliminado:** Michels, J., Stippkugel, A., Lenz, M., Wirtz, K. and Engel, A.: Rapid aggregation of biofilm-covered microplastics with marine biogenic particles, *Proc. R. Soc. B Biol. Sci.*, 285(1885), 20181203, doi:10.1098/rspb.2018.1203, 2018.¶

- Mitchell, J., Lowe, J., Wood, R. and Vellinga, M.: Extreme events due to human-induced climate change, *Philos. Trans. A. Math. Phys. Eng. Sci.*, 364, 2117–2133, doi:10.1098/rsta.2006.1816, 2006.
- !535 Mkhinini, N., Coimbra, A. L. S., Stegner, A., Arsouze, T., Taupier-Letage, I. and Béranger, K.: Long-lived mesoscale eddies in the eastern Mediterranean Sea: Analysis of 20 years of AVISO geostrophic velocities, *J. Geophys. Res. Ocean.*, 119(12), 8603–8626, doi:https://doi.org/10.1002/2014JC010176, 2014.
- Molcard, A., Poulain, P. M., Forget, P., Griffà, A., Barbin, Y., Gaggelli, J., De Maistre, J. C. and Rixen, M.: Comparison between VHF radar observations and data from drifter clusters in the Gulf of La Spezia (Mediterranean Sea), *J. Mar. Syst.*, 78, S79–S89, doi:https://doi.org/10.1016/j.jmarsys.2009.01.012, 2009.
- !540 Monserrat, S., Vilibić, I. and Rabinovich, A. B.: Meteotsunamis: atmospherically induced destructive ocean waves in the tsunami frequency band, *Nat. Hazards Earth Syst. Sci.*, 6(6), 1035–1051, doi:10.5194/nhess-6-1035-2006, 2006.
- Moore, A. M., Martin, M. J., Akella, S., Arango, H. G., Balmaseda, M., Bertino, L., Ciavatta, S., Cornuelle, B., Cummings, J., Frolov, S., Lermusiaux, P., Oddo, P., Oke, P. R., Storto, A., Teruzzi, A., Vidard, A. and Weaver, A. T.: Synthesis of Ocean Observations Using Data Assimilation for Operational, Real-Time and Reanalysis Systems: A More Complete Picture of the State of the Ocean, *Front. Mar. Sci.*, 6, 90, doi:10.3389/fmars.2019.00090, 2019.
- !545 Morrow, R., Birol, F., Griffin, D. and Sudre, J.: Divergent pathways of cyclonic and anti-cyclonic ocean eddies, *Geophys. Res. Lett.*, 31(24), doi:https://doi.org/10.1029/2004GL020974, 2004.
- Mourre, B., Aguiar, E., Juza, M., Hernandez-Lasheras, J., Reyes, E., Heslop, E., Escudier, R., Cutolo, E., Ruiz, S., Mason, E., Pascual, A. and Tintoré, J.: Assessment of High-Resolution Regional Ocean Prediction Systems Using Multi-Platform Observations: Illustrations in the Western Mediterranean Sea, *New Front. Oper. Oceanogr.*, 663–694, doi:10.17125/gov2018.ch24, 2018.
- Mourre, B., Santana, A., Buils, A., Gautreau, L., Ličer, M., Jansà, A., Casas, B., Amengual, B. and Tintoré, J.: On the potential of ensemble forecasting for the prediction of meteotsunamis in the Balearic Islands: sensitivity to atmospheric model parameterizations, *Nat. Hazards*, 106(2), 1315–1336, doi:10.1007/s11069-020-03908-x, 2020.
- !555 Mundaca-Moraga, V., Abarca-del-Rio, R., Figueroa, D. and Morales, J.: A Preliminary Study of Wave Energy Resource Using an HF Marine Radar, Application to an Eastern Southern Pacific Location: Advantages and Opportunities, *Remote Sens.*, 13(2), doi:10.3390/rs13020203, 2021.
- Nencioli, F., Dong, C., Dickey, T., Washburn, L. and McWilliams, J. C.: A Vector Geometry- Based Eddy Detection Algorithm and Its Application to a High-Resolution Numerical Model Product and High-Frequency Radar Surface Velocities in the Southern California Bight, *J. Atmos. Ocean. Technol.*, 27(3), 564–579, doi:10.1175/2009JTECHO725.1, 2010.
- !560 Nishimoto, M. M. and Libe Washburn: Patterns of coastal eddy circulation and abundance of pelagic juvenile fish in the Santa Barbara Channel, California, USA, *Mar. Ecol. Prog. Ser.*, 241, 183–199 [online] Available from: https://www.int-res.com/abstracts/meps/v241/p183-199/, 2002.
- Oke, P. R., Allen, J. S., Miller, R. N., Egbert, G. D. and Kosro, P. M.: Assimilation of surface velocity data into a primitive equation coastal ocean model, *J. Geophys. Res. Ocean.*, 107(C9), 5–25, doi:https://doi.org/10.1029/2000JC000511, 2002.

- Okubo, A.: Horizontal dispersion of floatable particles in the vicinity of velocity singularities such as convergences, *Deep Sea Res. Oceanogr. Abstr.*, 17(3), 445–454, doi:[https://doi.org/10.1016/0011-7471\(70\)90059-8](https://doi.org/10.1016/0011-7471(70)90059-8), 1970.
- Orasi, A., Picone, M., Drago, A., Capodici, F., Gauci, A., Nardone, G., Inghilesi, R., Azzopardi, J., Galea, A., Ciraolo, G., Sánchez Musulin, J. and Alonso-Martirena, A.: HF radar for wind waves measurements in the Malta-Sicily Channel, *Meas. J. Int. Meas. Confed.*, 128(June), 446–454, doi:[10.1016/j.measurement.2018.06.060](https://doi.org/10.1016/j.measurement.2018.06.060), 2018.
- Orfila, A., Balle, S. and Simarro, G.: Topographic enhancement of long waves generated by an idealized moving pressure system, *Sci. Mar.*, 75(3), 595–603, doi:[10.3989/scimar.2011.75n3595](https://doi.org/10.3989/scimar.2011.75n3595), 2011.
- Orfila, A., Molcard, A., Sayol, J. M., Marmain, J., Bellomo, L., Quentin, C. and Barbin, Y.: Empirical forecasting of HF-radar velocity using genetic algorithms, *IEEE Trans. Geosci. Remote Sens.*, 53(5), 2875–2886, doi:[10.1109/TGRS.2014.2366294](https://doi.org/10.1109/TGRS.2014.2366294), 2015.
- Orlić, M.: The first attempt at cataloguing tsunami-like waves of meteorological origin in Croatian coastal waters, *Acta Adriat. Int. J. Mar. Sci.*, 56(1), 83–95, 2015.
- Paduan, J. D. and Graber, H. C.: Introduction to high-frequency radar: Reality and myth, *Oceanography*, 10(SPL.ISS. 2), 36–39, doi:[10.5670/oceanog.1997.18](https://doi.org/10.5670/oceanog.1997.18), 1997.
- Paduan, J. D. and Shulman, I.: HF radar data assimilation in the Monterey Bay area, *J. Geophys. Res. C Ocean.*, 109(7), 1–17, doi:[10.1029/2003JC001949](https://doi.org/10.1029/2003JC001949), 2004.
- Paduan, J. D. and Washburn, L.: High-frequency radar observations of ocean surface currents, *Ann. Rev. Mar. Sci.*, 5(1), 115–136, doi:[10.1146/annurev-marine-121211-172315](https://doi.org/10.1146/annurev-marine-121211-172315), 2013.
- Papadopoulos, G. A.: On some exceptional seismic (?) sea-waves in the Greek archipelago, *Sci. Tsunami Hazards*, 11, 25–34, 1993.
- Pérez, Á., Teles-Machado, A., Marchesiello, P., Dubert, J. and Lafuente, J.: Filament generation off the Strait of Gibraltar in response to Gap winds, *Dyn. Atmos. Ocean.*, 46, 36–45, doi:[10.1016/j.dynatmoce.2008.08.002](https://doi.org/10.1016/j.dynatmoce.2008.08.002), 2009.
- Piedracoba, S., Rosón, G. and Varela, R. A.: Origin and development of recurrent dipolar vorticity structures in the outer Ría de Vigo (NW Spain), *Cont. Shelf Res.*, 118, 143–153, doi:[10.1016/j.csr.2016.03.001](https://doi.org/10.1016/j.csr.2016.03.001), 2016.
- Ponsford, A. M., Sevgi, L. and Chan, H.: An integrated maritime surveillance system based on high-frequency surface-wave radars. 2. Operational status and system performance, *Antennas Propag. Mag. IEEE*, 43, 52–63, doi:[10.1109/74.979367](https://doi.org/10.1109/74.979367), 2001.
- Poulain, P.-M., Mauri, E., Gerin, R., Chiggiato, J., Schroeder, K., Griffà, A., Borghini, M., Zambianchi, E., Falco, P., Testor, P. and Mortier, L.: On the dynamics in the southeastern Ligurian Sea in summer 2010, *Cont. Shelf Res.*, 196, 104083, doi:[10.1016/j.csr.2020.104083](https://doi.org/10.1016/j.csr.2020.104083), 2020.
- Preisendorfer, Mobley, Curtis D., R. W.: *Principal component analysis in meteorology and oceanography*, Elsevier; Distributors for the U.S. and Canada, Elsevier Science Pub. Co., Amsterdam; New York; New York, NY, U.S.A., 1988.
- Ren, L., Hu, Z. and Hartnett, M.: Short-Term Forecasting of Coastal Surface Currents Using High Frequency Radar Data and Artificial Neural Networks, *Remote Sens.*, 10(6), doi:[10.3390/rs10060850](https://doi.org/10.3390/rs10060850), 2018.

- Révelard, A., Reyes, E., Moure, B., Hernández-Carrasco, I., Rubio, A., Lorente, P., Fernández, C. D. L., Mader, J., Álvarez-Fanjul, E. and Tintoré, J.: Sensitivity of Skill Score Metric to Validate Lagrangian Simulations in Coastal Areas: Recommendations for Search and Rescue Applications, *Front. Mar. Sci.*, 8, 191 [online] Available from: <https://www.frontiersin.org/article/10.3389/fmars.2021.630388>, 2021.
- Reyes, E.: A high-resolution modeling study of the ocean response to wind forcing within the Strait of Gibraltar, 27 February., PhD Thesis, 230 pp, DOI: 10.13140/RG.2.2.28881.07525, 2015.
- Reyes, E., Rotllán-García, P., Rubio, A., Corgnati, L., Mader, J., and Mantovani, C.: Guidelines on how to sync your High Frequency (HF) radar data with the European HF Radar node (Version 1.2), Balearic Islands Coastal Observing and Forecasting System, SOCIB, doi:10.25704/9XPF-76G7, 2019.
- Reyes, E., Hernández-Carrasco, I., Révelard, A., Moure, B., Rotllán, P., Comerma, E., Bakhsh, T.T., Rubio, A., Mader, J., Ferrer, L., De Lera Fernández, C., Álvarez-Fanjul, E., and Tintoré, J.: IBISAR service for real-time data ranking in the IBI area for emergency responders and SAR operators. In: Copernicus Marine Service Ocean State Report, Issue 4, *J. Oper. Oceanogr.*, 13(S1), s92–s99, doi:10.1080/1755876X.2020.1785097, 2020.
- Rinaldi, E., Buongiorno Nardelli, B., Zambianchi, E., Santoleri, R. and Poulain, P.-M.: Lagrangian and Eulerian observations of the surface circulation in the Tyrrhenian Sea, *J. Geophys. Res. Ocean.*, 115(C4), doi:<https://doi.org/10.1029/2009JC005535>, 2010.
- Roarty, H., Glenn, S., Kohut, J., Gong, D., Handel, E., Rivera, E., Garner, T., Atkinson, L., Brown, W., Jakubiak, C., Muglia, M., Haines, S. and Seim, H.: Operation and Application of a Regional High-Frequency Radar Network in the Mid-Atlantic Bight, *Mar. Technol. Soc. J.*, 44, 133–145, 2010.
- Roarty, H., Cook, T., Hazard, L., Harlan, J., Cosoli, S., Wyatt, L., Fanjul, E. A., Terrill, E., Otero, M., Largier, J., Glenn, S., Ebuchi, N., Whitehouse, B., Bartlett, K., Mader, J., Rubio, A., Corgnati, L. P., Mantovani, C., Griffa, A., Reyes, E., Lorente, P., Flores-Vidal, X., Rogowski, P., Prukpitikul, S., Lee, S. H., Lai, J. W., Guerin, C., Sanchez, J., Hansen, B., Grilli, S. and Matta, K. S.: The global high frequency radar network, *Front. Mar. Sci.*, 6(MAR), doi:10.3389/fmars.2019.00164, 2019.
- Robinson, A. R.: Overview and Summary of Eddy Science BT - Eddies in Marine Science, edited by A. R. Robinson, pp. 3–15, Springer Berlin Heidelberg, Berlin, Heidelberg., 1983.
- Robinson, I.: *Discovering the Ocean from Space*, *Discov. Ocean from Sp.* by Ian S. Robinson. Berlin Springer, 2010. ISBN 978-3-540-24430-1, doi:10.1007/978-3-540-68322-3\_1, 2010.
- Romero, R., Vich, M.-M. and Ramis, C.: A pragmatic approach for the numerical prediction of meteotsunamis in Ciutadella harbour (Balearic Islands), *Ocean Model.*, 142, 101441, doi:10.1016/j.ocemod.2019.101441, 2019.
- Rubio, A., Mader, J., Corgnati, L., Mantovani, C., Griffa, A., Novellino, A., Quentin, C., Wyatt, L., Schulz-Stellenfleth, J., Horstmann, J., Lorente, P., Zambianchi, E., Hartnett, M., Fernandes, C., Zervakis, V., Gorringe, P., Melet, A. and Puillat, I.: HF Radar activity in European coastal seas: Next steps toward a Pan-European HF Radar network, *Front. Mar. Sci.*, 4(JAN), 1–17, doi:10.3389/fmars.2017.00008, 2017.

- Rubio, A., Caballero, A., Orfila, A., Hernández-Carrasco, I., Ferrer, L., González, M., Solabarrieta, L. and Mader, J.: Eddy-induced cross-shelf export of high Chl-a coastal waters in the SE Bay of Biscay, *Remote Sens. Environ.*, 205(October 2017), 290–304, doi:10.1016/j.rse.2017.10.037, 2018.
- !635 Rubio, A., I. Hernández-Carrasco, A. Orfila, M. González, E. Reyes, L. Corgnati, M. Berta, A. Griffà and J. Mader: A Lagrangian approach to monitor local particle retention conditions in coastal areas. In: Copernicus Marine Service Ocean State Report, Issue 4, *J. Oper. Oceanogr.*, 13:sup1, s54–s59; DOI: 10.1080/1755876X.2020.1785097, 2020.
- Rubio, A., Reyes, E., Mantovani, C., Corgnati, L., Lorente, P., Solabarrieta, L., Mader, J., Fernández, V., Pouliquen, S., Novellino, A., Karstensen, J. and Petihakis, G.: European High Frequency Radar network governance, D3.4 . EuroSea Deliverable, 41 pp., doi:10.3289/eurosea\_d3.4, 2021.
- !640 Ruiz-Parrado I., , A. Genua-Olmedo, E. Reyes, B. Murre, P. Rotllán, P. Lorente, M. García-Sotillo and J. Tintoré: Coastal ocean variability related to the most extreme Ebro River discharge over the last 15 years. In: Copernicus Marine Service Ocean State Report, Issue 4, *J. Oper. Oceanogr.*, 13(S1), s160–s165, doi:10.1080/1755876X.2020.1785097, 2020.
- Ryabinin, V., Barbière, J., Haugan, P., Kullenberg, G., Smith, N., McLean, C., Troisi, A., Fischer, A., Aricò, S., Aarup, T., Pissierssens, P., Visbeck, M., Enevoldsen, H. O. and Rigaud, J.: The UN Decade of Ocean Science for Sustainable Development . *Front. Mar. Sci.* , 6 [online] Available from: <https://www.frontiersin.org/article/10.3389/fmars.2019.00470.2019>.
- !645 Ryan, P. G., Moore, C. J., van Franeker, J. A. and Moloney, C. L.: Monitoring the abundance of plastic debris in the marine environment, *Philos. Trans. R. Soc. B Biol. Sci.*, 364(1526), 1999–2012, doi:10.1098/rstb.2008.0207, 2009.
- !650 Sadarjoen, I. A., Post, F. H., Ma, B., Banks, D. C. and Pagendarm, H.-G.: Selective visualization of vortices in hydrodynamic flows, in *Proceedings Visualization '98* (Cat. No.98CB36276), pp. 419–422., 1998.
- Sahal, A., Roger, J., Allgeyer, S., Lemaire, B., Hébert, H., Schindelé, F. and Lavigne, F.: The tsunami triggered by the 21 May 2003 Boumerdès-Zemmouri (Algeria) earthquake: field investigations on the French Mediterranean coast and tsunami modelling, *Nat. Hazards Earth Syst. Sci.*, 9(6), 1823–1834, doi:10.5194/nhess-9-1823-2009, 2009.
- !655 Sánchez-Arcilla, A., García-León, M. and Gracia, V.: Hydro-morphodynamic modelling in Mediterranean storms &ndash; errors and uncertainties under sharp gradients, *Nat. Hazards Earth Syst. Sci.*, 14(11), 2993–3004, doi:10.5194/nhess-14-2993-2014, 2014.
- Sánchez-Garrido, J. C., García Lafuente, J., Álvarez Fanjul, E., Sotillo, M. G. and de los Santos, F. J.: What does cause the collapse of the Western Alboran Gyre? Results of an operational ocean model, *Prog. Oceanogr.*, 116(Complete), 142–153, doi:10.1016/j.pocan.2013.07.002, 2013.
- !660 Saviano, S., Kalampokis, A., Zambianchi, E. and Uttieri, M.: A year-long assessment of wave measurements retrieved from an HF radar network in the Gulf of Naples (Tyrrhenian Sea, Western Mediterranean Sea), *J. Oper. Oceanogr.*, 12(1), 1–15, doi:10.1080/1755876X.2019.1565853, 2019.



- Saviano, S., Cianelli, D., Zambianchi, E., Conversano, F. and Uttieri, M.: An Integrated Reconstruction of the Multiannual Wave Pattern in the Gulf of Naples (South-Eastern Tyrrhenian Sea, Western Mediterranean Sea), *J. Mar. Sci. Eng.*, 8(5), doi:10.3390/jmse8050372, 2020.
- Saviano, S., Esposito, G., Di Lemma, R., de Ruggiero, P., Zambianchi, E., Pierini, S., Falco, P., Buonocore, B., Cianelli, D. and Uttieri, M.: Wind Direction Data from a Coastal HF Radar System in the Gulf of Naples (Central Mediterranean Sea), *Remote Sens.*, 13(7), doi:10.3390/rs13071333, 2021.
- Sayol, J. M., Orfila, A., Simarro, G., Conti, D., Renault, L. and Molcard, A.: A Lagrangian model for tracking surface spills and SaR operations in the ocean, *Environ. Model. Softw.*, 52, 74–82, doi:https://doi.org/10.1016/j.envsoft.2013.10.013, 2014.
- Schaeffer, A., Molcard, A., Forget, P., Fraunić, P. and Garreau, P.: Generation mechanisms for mesoscale eddies in the Gulf of Lions: radar observation and modeling, *Ocean Dyn.*, 61(10), 1587–1609, doi:10.1007/s10236-011-0482-8, 2011.
- Sciascia, R., Berta, M., Carlson, D. F., Griffa, A., Panfili, M., La Mesa, M., Corgnati, L., Mantovani, C., Domenella, E., Fredj, E., Magaldi, M. G., D'Adamo, R., Paziienza, G., Zambianchi, E. and Poulain, P.-M.: Linking sardine recruitment in coastal areas to ocean currents using surface drifters and HF radar: a case study in the Gulf of Manfredonia, Adriatic Sea, *Ocean Sci.*, 14(6), 1461–1482, doi:10.5194/os-14-1461-2018, 2018.
- Šepić, J., Vilibić, I. and Belušić, D.: Source of the 2007 Ist meteotsunami (Adriatic Sea), *J. Geophys. Res. Ocean.*, 114(C3), doi:https://doi.org/10.1029/2008JC005092, 2009.
- Šepić, J., Vilibić, I., Rabinovich, A. B. and Monserrat, S.: Widespread tsunami-like waves of 23–27 June in the Mediterranean and Black Seas generated by high-altitude atmospheric forcing, *Sci. Rep.*, 5(1), 11682, doi:10.1038/srep11682, 2015.
- Shay, L. K., Graber, H. C., Ross, D. B. and Chapman, R. D.: Mesoscale Ocean Surface Current Structure Detected by High-Frequency Radar, *J. Atmos. Ocean. Technol.*, 12(4), 881–900, doi:10.1175/1520-0426(1995)012<0881:MOSCSD>2.0.CO;2, 1995.
- Shay, L., Cook, T., Haus, B., Martinez-Pedraja, J., Peters, H., Mariano, A., VanLeer, J., An, P., Smith, S., Soloviev, A., Weisberg, R. and Luther, M.: VHF radar detects oceanic submesoscale vortex along Florida Coast, *EOS Trans.*, 81(19), 209–213, doi:10.1029/00EO00143, 2000.
- Shchepetkin, A. F. and McWilliams, J. C.: A method for computing horizontal pressure-gradient force in an oceanic model with a nonaligned vertical coordinate, *J. Geophys. Res. Ocean.*, 108(C3), doi:https://doi.org/10.1029/2001JC001047, 2003.
- Shchepetkin, A. F. and McWilliams, J. C.: The regional oceanic modeling system (ROMS): a split-explicit, free-surface, topography-following-coordinate oceanic model, *Ocean Model.*, 9(4), 347–404, doi:https://doi.org/10.1016/j.ocemod.2004.08.002, 2005.
- Shen, W., Gurgel, K.-W., Voulgaris, G., Schlick, T. and Stammer, D.: Wind-speed inversion from HF radar first-order backscatter signal, *Ocean Dyn.*, 62(1), 105–121, doi:10.1007/s10236-011-0465-9, 2012.
- Shen, W. and Gurgel, K. W.: Wind direction inversion from narrow-beam HF radar backscatter signals in low and high wind conditions at different radar frequencies, *Remote Sens.*, 10(9), doi:10.3390/rs10091480, 2018.

- Shrira, V. I. and Forget, P.: On the Nature of Near-Inertial Oscillations in the Uppermost Part of the Ocean and a Possible Route toward HF Radar Probing of Stratification, *J. Phys. Oceanogr.*, 45(10), 2660–2678, doi:10.1175/JPO-D-14-0247.1, 2015.
- 700 [Sikora, A.: European Green Deal – legal and financial challenges of the climate change. ERA Forum, 21\(4\), 681–697, doi:10.1007/s12027-020-00637-3, 2021.](#)
- Solabarrieta, L., Frolov, S., Cook, M., Paduan, J., Rubio, A., González, M., Mader, J. and Charria, G.: Skill assessment of HF radar-derived products for Lagrangian simulations in the Bay Of Biscay, *J. Atmos. Ocean. Technol.*, 33(12), 2585–2597, doi:10.1175/JTECH-D-16-0045.1, 2016.
- 705 Solabarrieta, L., Hernández-Carrasco, I., Rubio, A., Campbell, M., Esnaola, G., Mader, J., Jones, B. H. and Orfila, A.: A new Lagrangian-based short-term prediction methodology for high-frequency (HF) radar currents, *Ocean Sci.*, 17(3), 755–768, doi:10.5194/os-17-755-2021, 2021.
- Sotillo, M. G., Cailleau, S., Lorente, P., Levier, B., Aznar, R., Reffray, G., Amo-Baladrón, A., Chanut, J., Benkiran, M. and Álvarez-Fanjul, E.: The MyOcean IBI ocean forecast and reanalysis systems: Operational products and roadmap to the future copernicus service, *J. Oper. Oceanogr.*, 8(1), 63–79, doi:10.1080/1755876X.2015.1014663, 2015.
- 710 Sotillo, M. G., Moure, B., Mestres, M., Lorente, P., Aznar, R., García-León, M., Liste, M., Santana, A., Espino, M. and Álvarez, E.: Evaluation of the Operational CMEMS and Coastal Downstream Ocean Forecasting Services During the Storm Gloria (January 2020), *Front. Mar. Sci.*, 8, 300 [online] Available from: <https://www.frontiersin.org/article/10.3389/fmars.2021.644525>, 2021.
- 715 Soto-Navarro, J., Jordá, G., Compa, M., Alomar, C., Fossi, M. C. and Deudero, S.: Impact of the marine litter pollution on the Mediterranean biodiversity: A risk assessment study with focus on the marine protected areas, *Mar. Pollut. Bull.*, 165, 112169, doi:<https://doi.org/10.1016/j.marpolbul.2021.112169>, 2021.
- Stott, P.: How climate change affects extreme weather events, *Science*, 352(6293), 1517–1518, doi:10.1126/science.aaf7271, 2016.
- 720 Tessier, E., Garnier, C., Mullot, J. Ulrich, Lenoble, V., Arnaud, M., Raynaud, M. and Mounier, S.: Study of the spatial and historical distribution of sediment inorganic contamination in the Toulon Bay (France), *Mar. Pollut. Bull.*, 62, 2075–2086, doi:10.1016/j.marpolbul.2011.07.022, 2011.
- Tew Kai, E., Rossi, V., Sudre, J., Weimerskirch, H., Lopez, C., Hernandez-Garcia, E., Marsac, F. and Garçon, V.: Top marine predators track Lagrangian coherent structures, *Proc. Natl. Acad. Sci.*, 106(20), 8245 LP – 8250, doi:10.1073/pnas.0811034106, 2009.
- 725 Tintoré, J., Vizoso, G., Casas, B., Heslop, E., Pascual, A., Orfila, A., Ruiz, S., Martínez-Ledesma, M., Torner, M., Cusi, S., Diedrich, A., Balaguer, P., Gómez-Pujol, L., Álvarez-Ellacuria, A., Gómara, S., Sebastian, K., Lora, S., Beltrán, J. P., Renault, L., Juzà, M., Álvarez, D., March, D., Garau, B., Castilla, C., Cañellas, T., Roque, D., Lizarán, I., Pitarch, S., Carrasco, M. A., Lana, A., Mason, E., Escudier, R., Conti, D., Sayol, J. M., Barceló, B., Alemany, F., Reglero, P., Massutí, E., Vélez-Belchí, P., Ruiz, J., Oguz, T., Gómez, M., Álvarez, E., Ansorena, L. and Manriquez, M.: SOCIB: The Balearic islands coastal ocean
- 730

- observing and forecasting system responding to science, technology and society needs, *Mar. Technol. Soc. J.*, 47(1), 101–117, doi:10.4031/MTSJ.47.1.10, 2013.
- Tintoré, J., Lana, A., Marmain, J., Fernández, V., and Orfila, A.: SOCIB EXP RADAR Sep2014 (Version 1.0) [Data set]. Brussels: Balearic Islands Coastal Observing and Forecasting System, SOCIB, doi: 10.25704/MHBG-Q265, 2014.
- !735 Tintoré, J., Pinardi, N., Álvarez-Fanjul, E., Aguiar, E., Álvarez-Berastegui, D., Bajo, M., Balbin, R., Bozzano, R., Nardelli, B. B., Cardin, V., Casas, B., Charcos-Llorens, M., Chiggiato, J., Clementi, E., Coppini, G., Coppola, L., Cossarini, G., Deidun, A., Deudero, S., D’Ortenzio, F., Drago, A., Drudi, M., El Serafy, G., Escudier, R., Farcy, P., Federico, I., Fernández, J. G., Ferrarin, C., Fossi, C., Frangoulis, C., Galgani, F., Gana, S., García Lafuente, J., Sotillo, M. G., Garreau, P., Gertman, I., Gómez-Pujol, L., Grandi, A., Hayes, D., Hernández-Lasheras, J., Herut, B., Heslop, E., Hilmi, K., Juzza, M., Kallos, G., Korres, G., Lecci, R., Lazzari, P., Lorente, P., Liubartseva, S., Louanchi, F., Malacic, V., Mannarini, G., March, D., Marullo, S., Mauri, E., Meszaros, L., Mourre, B., Mortier, L., Muñoz-Mas, C., Novellino, A., Obaton, D., Orfila, A., Pascual, A., Pensieri, S., Pérez Gómez, B., Pérez Rubio, S., Perivoliotis, L., Petihakis, G., de la Villéon, L. P., Pistoia, J., Poulain, P. M., Pouliquen, S., Prieto, L., Raimbault, P., Reglero, P., Reyes, E., Rotllan, P., Ruiz, S., Ruiz, J., Ruiz, I., Ruiz-Orejón, L. F., Salihoglu, B., Salon, S., Sammartino, S., Sánchez Arcilla, A., Sannino, G., Sannino, G., Santoleri, R., Sardá, R., Schroeder, K., Simoncelli, S., Sofianos, S., Sylaios, G., Tanhua, T., Teruzzi, A., Testor, P., Tezcan, D., Torner, M., et al.: Challenges for Sustained Observing and Forecasting Systems in the Mediterranean Sea, *Front. Mar. Sci.*, 6, doi:10.3389/fmars.2019.00568, 2019.
- !740 Tintoré, J., Lana, A., Marmain, J., Fernández, V., Casas, B., & Reyes, E.: HF Radar Ibiza data from date 2012-06-01 (Version 1.0.1) [Data set]. Balearic Islands Coastal Observing and Forecasting System, SOCIB. <https://doi.org/10.25704/17GS-2B59>, 2020
- !750 Trevisanut, S.: Search and Rescue Operations in the Mediterranean: Factor of Cooperation or Conflict?, *Int. J. Mar. Coast. Law*, 25(4), 523–542, doi:<https://doi.org/10.1163/157180810X526754>, 2010.
- Tudor, M., Ivatek-Šahdan, S., Stanešić, A., Horvath, K., Bajčić, A.: Forecasting weather in Croatia using ALADIN numerical weather prediction model. In: *Climate Change and Regional/Local Responses* (Eds. Ray P. and Zhang Y.), InTech, Rijeka, Croatia, pp. 59–88, 2013.
- !755 Ullman, D. S., O’Donnell, J., Kohut, J., Fake, T. and Allen, A.: Trajectory prediction using HF radar surface currents: Monte Carlo simulations of prediction uncertainties, *J. Geophys. Res. Ocean.*, 111(12), 1–14, doi:10.1029/2006JC003715, 2006.
- Uttieri, M., Cianelli, D., Nardelli, B. B., Buonocore, B., Falco, P., Colella, S. and Zambianchi, E.: Multiplatform observation of the surface circulation in the Gulf of Naples (Southern Tyrrhenian Sea), *Ocean Dyn.*, 61(6), 779–796, doi:10.1007/s10236-011-0401-z, 2011.
- !760 Vandenbulcke, L., Beckers, J. M. and Barth, A.: Correction of inertial oscillations by assimilation of HF radar data in a model of the Ligurian Sea, *Ocean Dyn.*, 67(1), 117–135, doi:10.1007/s10236-016-1012-5, 2017.
- Vignudelli, S., Birol, F., Benveniste, J., Fu, L.L., Picot, N., Raynal, M. and Roinard, H.: Satellite Altimetry Measurements of Sea Level in the Coastal Zone, *Surv. Geophys.*, 40(6), 1319–1349, doi:10.1007/s10712-019-09569-1, 2019.

- !765 Vignudelli, S., Cipollini, P., Astraldi, M., Gasparini, G. P. and Manzella, G.: Integrated use of altimeter and in situ data for understanding the water exchanges between the Tyrrhenian and Ligurian Seas, *J. Geophys. Res.*, 105(C8), 19633–19649 [online] Available from: <http://nora.nerc.ac.uk/id/eprint/108799/>, 2000.
- Vilibić, I. and Šepić, J.: Destructive meteotsunamis along the eastern Adriatic coast: Overview, *Phys. Chem. Earth, Parts A/B/C*, 34(17), 904–917, doi:<https://doi.org/10.1016/j.pce.2009.08.004>, 2009.
- !770 Vilibić, I., Šepić, J., Mihanović, H., Kalinić, H., Cosoli, S., Janeković, I., Žagar, N., Jesenko, B., Tudor, M., Dadić, V. and Ivanković, D.: Self-Organizing Maps-based ocean currents forecasting system, *Sci. Rep.*, 6(1), 22924, doi:10.1038/srep22924, 2016.
- Vilibić, I., Denamiel, C., Zemunik, P. and Monserrat, S.: The Mediterranean and Black Sea meteotsunamis: an overview, *Nat. Hazards J. Int. Soc. Prev. Mitig. Nat. Hazards*, 106(2), 1223–1267, doi:10.1007/s11069-020-04306-, 2021.
- !775 Vučetić, T., Vilibić, I., Tinti, S. and Maramai, A.: The Great Adriatic flood of 21 June 1978 revisited: An overview of the reports, *Phys. Chem. Earth, Parts A/B/C*, 34(17), 894–903, doi:<https://doi.org/10.1016/j.pce.2009.08.005>, 2009.
- Wang, X. and Liu, P. L.-F.: A Numerical Investigation of Boumerdes-Zemmouri (Algeria) Earthquake and Tsunami, *Comput. Model. Eng. & Sci.*, 10(2), doi:10.3970/cmcs.2005.010.171, 2005.
- Weiss, J.: The dynamics of enstrophy transfer in two-dimensional hydrodynamics, *Phys. D Nonlinear Phenom.*, 48(2), 273–294, doi:[https://doi.org/10.1016/0167-2789\(91\)90088-Q](https://doi.org/10.1016/0167-2789(91)90088-Q), 1991.
- !780 Wilkin, J. L. and Hunter, E. J.: An assessment of the skill of real-time models of Mid-Atlantic Bight continental shelf circulation, *J. Geophys. Res. Ocean.*, 118(6), 2919–2933, doi:10.1002/jgrc.20223, 2013.
- Wyatt, L. R.: Wave mapping with HF radar. In: 2011 IEEE/OES 10th Curr. Waves Turbul. Meas., 25–30, 2011.
- Wyatt, L. R.: Use of HF radar for marine renewable applications, in 2012 Oceans - Yeosu, pp. 1–5, <https://doi.org/10.1109/OCEANS-Yeosu.2012.6263439>, 2012.
- !785 Wyatt, L. R.: High frequency radar applications in coastal monitoring, planning and engineering, *Aust. J. Civ. Eng.*, 12(1), 1–15, doi:10.7158/14488353.2014.11463992, 2014.
- [Wyatt, L.: Spatio-Temporal Metocean Measurements for Offshore Wind Power. \*J. Energy Power Technol.\*, 3, doi:10.21926/jept.2101005, 2021.](https://doi.org/10.21926/jept.2101005)
- !790 Wyatt, L. R. and Green, J. J.: Measuring high and low waves with HF radar, *Ocean. 2009-EUROPE*, 1–5 [online] Available from: <https://eprints.whiterose.ac.uk/10590/>, 2009.
- Wyatt, L. R., Green, J. J., Middleditch, A., Moorhead, M. D., Howarth, J., Holt, M. and Keogh, S.: Operational Wave, Current, and Wind Measurements With the Pisces HF Radar, *IEEE J. Ocean. Eng.*, 31(4), 819–834, doi:10.1109/JOE.2006.888378, 2006.
- !795 Yaremchuk, M. and Sentchev, A.: A combined EOF/variational approach for mapping radar-derived sea surface currents, *Cont. Shelf Res.*, 31, doi:10.1016/j.csr.2011.01.009, 2011.
- Zelenke, B.: An Empirical Statistical Model Relating Winds and Ocean Surface Currents: Implications for Short-term Current Forecasts., Master of Science in Oceanography - Thesis, Oregon State University, 2005.

1800

Zemunik, P., Bonanno, A., Mazzola, S., Giacalone, G., Fontana, I., Genovese, S., Basilone, G., Candela, J., Šepić, J., Vilibić, I. and Aronica, S.: Observing meteotsunamis (“Marrobbio”) on the southwestern coast of Sicily, *Nat. Hazards*, 106, 1337-1363, doi:10.1007/s11069-020-04303-2, 2020.

Zeng, Y., Zhou, H., Roarty, H. and Wen, B.: Wind Speed Inversion in High Frequency Radar Based on Neural Network, edited by K. El-Darymli, *Int. J. Antennas Propag.*, 2016, ID. 2706521, doi:10.1155/2016/2706521, 2016.

Zeng, Y., Zhou, H., Lai, Y. and Wen, B.: Wind-Direction Mapping With a Modified Wind Spreading Function by Broad-Beam High-Frequency Radar, *IEEE Geosci. Remote Sens. Lett.*, 15, 679–683, 2018.

1805

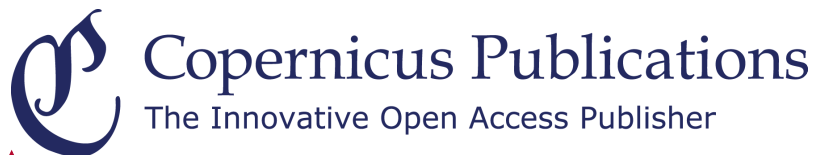

Con formato: Revisar la ortografía y la gramática

▼ ▲  
**Página 19: [1] Eliminado** Emma Reyes 25/3/22 7:10:00

▼ ▲  
**Página 20: [2] Eliminado** Emma Reyes 3/4/22 18:49:00

▼ ▲  
**Página 24: [3] Eliminado** Emma Reyes 3/4/22 19:50:00

▼ ▲  
**Página 24: [4] Eliminado** Emma Reyes 8/3/22 13:05:00

▼ ▲  
**Página 38: [5] Eliminado** Emma Reyes 4/4/22 12:51:00

▼ ▲  
**Página 42: [6] Eliminado** Emma Reyes 4/4/22 3:40:00

▼ ▲  
**Página 42: [7] Eliminado** Emma Reyes 25/3/22 5:43:00

▼ ▲  
a) **Página 42: [8] Eliminado** Emma Reyes 25/3/22 5:47:00

▼ ▲  
b) **Página 43: [9] Eliminado** Emma Reyes 4/4/22 3:23:00

▼ ▲  
**Página 43: [10] Eliminado** Emma Reyes 4/4/22 3:16:00
